# Supplementary material for: Transformation of mortality in a remote Australian Aboriginal community: a retrospective observational study
Source: PubMed Central journal article supplement — BMJ Open. 2017 Aug 11;7(8):e016094. doi: 10.1136/bmjopen-2017-016094 (PMC5629742; doi:10.1136/bmjopen-2017-016094), 2017-08-11
Supplement: bmjopen-2017-016094.draft_revisions.pdf [file bmjopen-2017-016094.draft_revisions.pdf]

# BMJ Open

BMJ Open is committed to open peer review. As part of this commitment we make the peer review history of every article we publish publicly available.

When an article is published we post the peer reviewers' comments and the authors' responses online. We also post the versions of the paper that were used during peer review. These are the versions that the peer review comments apply to.

The versions of the paper that follow are the versions that were submitted during the peer review process. They are not the versions of record or the final published versions. They should not be cited or distributed as the published version of this manuscript.

BMJ Open is an open access journal and the full, final, typeset and author-corrected version of record of the manuscript is available on our site with no access controls, subscription charges or pay-per-view fees (<http://bmjopen.bmj.com>).

If you have any questions on BMJ Open's open peer review process please email [editorial.bmjopen@bmj.com](mailto:editorial.bmjopen@bmj.com)

# BMJ Open

## Transformation of mortality in a remote Australian Aboriginal community: a retrospective observational study

|                                 |                                                                                                                                                                                                                                                                                                                                                    |
|---------------------------------|----------------------------------------------------------------------------------------------------------------------------------------------------------------------------------------------------------------------------------------------------------------------------------------------------------------------------------------------------|
| Journal:                        | <i>BMJ Open</i>                                                                                                                                                                                                                                                                                                                                    |
| Manuscript ID                   | bmjopen-2017-016094                                                                                                                                                                                                                                                                                                                                |
| Article Type:                   | Research                                                                                                                                                                                                                                                                                                                                           |
| Date Submitted by the Author:   | 24-Jan-2017                                                                                                                                                                                                                                                                                                                                        |
| Complete List of Authors:       | Hoy, Wendy; The University of Queensland, Centre for Chronic Disease, UQCCR, Faculty of Medicine<br>Mott, Susan; The University of Queensland, Centre for Chronic Disease, UQCCR, Faculty of Medicine<br>McLeod, Beverly ; The University of Queensland, Centre for Chronic Disease, UQCCR, Faculty of Medicine; Menzies School of Health Research |
| <b>Primary Subject Heading</b>: | Epidemiology                                                                                                                                                                                                                                                                                                                                       |
| Secondary Subject Heading:      | Public health                                                                                                                                                                                                                                                                                                                                      |
| Keywords:                       | Australian Aboriginal, Mortality transition, Demographic profile, Remote-living, Chronic disease                                                                                                                                                                                                                                                   |
|                                 |                                                                                                                                                                                                                                                                                                                                                    |

SCHOLARONE™  
Manuscripts

1  
2  
3 **Transformation of mortality in a remote Australian Aboriginal community: a retrospective**  
4  
5 **observational study**  
6

7 **Hoy WE**

8 *Corresponding author,*

9  
10 The University of Queensland,

11  
12 Director of the CKD.CRE and the Centre for Chronic Disease and Professor of Medicine

13  
14 Centre for Chronic Disease, Faculty of Medicine, The University of Queensland, Health  
15  
16 Sciences Building, Level 8, Royal Brisbane & Women's Hospital , Herston, Queensland 4029,  
17  
18 Australia. w.hoy@uq.edu.au, +61 7 3346 4809;  
19

20  
21 **Mott SA**

22  
23 The University of Queensland,

24  
25 Senior Research Officer,

26  
27 Centre for Chronic Disease, Faculty of Medicine, The University of Queensland, Health  
28  
29 Sciences Building, Level 8, Royal Brisbane & Women's Hospital , Herston, Queensland 4029,  
30  
31 Australia;  
32

33 **McLeod BJ**

34  
35 Retired,

36  
37 Centre for Chronic Disease, Faculty of Medicine, The University of Queensland, Health  
38  
39 Sciences Building, Level 8, Royal Brisbane & Women's Hospital , Herston, Queensland 4029,  
40  
41 Australia; and Menzies School of Health Research, Royal Darwin Hospital Campus, PO Box  
42  
43 41096, Casuarina NT 0811.

44 **Word count, excluding title page, abstract, references, figures and tables: 3,187**  
45  
46  
47  
48  
49  
50  
51  
52  
53  
54  
55  
56  
57  
58  
59  
60

## Abstract

**Objectives** To describe trends in ages and causes of deaths in a remote-living Australian Aboriginal group over a recent 50 year period.

**Design** A retrospective observational study, from 1960 to 2010, of deaths and people starting dialysis, using data from local clinic, parish, dialysis and birthweight registers.

**Setting** A remote island community in the Top End of Australia's Northern Territory, where a Catholic Mission was established in 1911. The estimated Aboriginal population was about 800 in 1960 and 2,260 in 2011.

**Participants** All Aboriginal residents of this community whose deaths had been recorded.

**Outcome measures** Annual frequencies and rates of terminal events (deaths and dialysis starts) by age-group and cause of death.

**Results** In all, and against a background of high rates of low birthweight, 223 deaths in infants and children and 934 deaths in adults (age  $\geq 15$  years) were recorded; 88% were of natural causes. Most deaths in the 1960s were in infants and children. However, these fell dramatically, across the birthweight spectrum, while adult deaths progressively increased. The leading causes of adult natural deaths were chronic lung disease, cardiovascular disease and, more recently, renal failure, and rates were increased two-fold in those of low birthweight. However, rates of natural adult deaths have been falling briskly since 1986, most markedly among people of age 45+ years. The population is increasing and its age structure is maturing.

**Conclusions** The changes in death profiles, the expression of the Barker hypothesis and the ongoing increases in adult life expectancy, reflect epidemiologic and health transitions of astonishing rapidity. These probably flow from advances in public health policy and health care delivery, as well as improved inter-sectoral services, which are all to be celebrated. Other remote communities in Australia are experiencing the same phenomena, and similar events are well advanced in many developing countries.

## Strengths and limitations of this study

- The broad sweep and historical depth of this study, the unique data sources and the integration of clinical and demographic information have allowed delineation of the profound and recent transformation of mortality not previously appreciated in the Australian Aboriginal setting.
- Although the failure to have captured some deaths is inevitable, it has probably resulted in understatement of the magnitude of this transition.

## Introduction

Recent literature describes a rapid shift in patterns and causes of death in most countries and regions. Infant and childhood deaths have decreased, life expectancy has increased,<sup>1</sup> and more deaths in adults are associated with non-communicable chronic diseases.<sup>2</sup> Here we describe such a transition in a remote-living Aboriginal Australian group over the last 51 years.

The Tiwi people live in three major communities (and several smaller ones) on Bathurst and Melville Islands off the coast of the Northern Territory (NT), about 90 km by sea from Darwin (Figure 1). They lived in relative isolation for perhaps 7,000 to 15,000 years, and consider themselves distinct from mainland Aboriginal people, with their own unique origins, language, and customs.<sup>3</sup>

In 1911, a Catholic mission was established by the Missionaries of the Sacred Heart (MSC), led by Father Francis Xavier Gsell.<sup>4</sup> Changes followed in lifestyle (from nomadic hunter gatherers to living in fixed dwellings), in diet (from food from the bush and sea to depot supplies of less perishable, high caloric density food, of flour, fat, meat and sugar), in family and community structures (from polygamy and networks of carers within extended families to monogamy), and in the establishment of dormitories, schools and clinics. Transition has been especially accelerated since World War 2. Cigarettes were widely introduced around this time. The 1967 referendum formally recognised Aboriginal people in Australia,<sup>5</sup> and they were thenceforth included as residents in the national census. Legal access to alcohol began around that time. The first social club, serving alcohol, was opened in the largest Tiwi community in 1967.

Some early insights into remote-living Aboriginal people in the NT are provided by Ellen Kettle, the first Rural Survey Sister in the NT, who pioneered mobile health work in isolated areas and established health records for individuals, and by Dr John Hargrave, the first Aboriginal Health Officer, who personally examined members of many communities in 1957/1958. Both advanced understanding of Aboriginal health and development of services and policy. They described endemic conditions (yaws, malaria, infestations, trachoma), imported conditions like leprosy, syphilis (arguably), tuberculosis, measles, small pox and influenza. They documented florid malnutrition and frank starvation, high infant and maternal mortality and conspicuously low birthweight. They then described, over time, dramatic reductions in infant mortality, the appearance of alcohol related disorders, and of occasional overweight and obesity, as well as the emergence of non-communicable chronic diseases.<sup>6,7</sup>

These phenomena occurred against a background of continuous improvements in remote Aboriginal health services, including management of infections and infestations, immunisations, better obstetric services, better maternal and child care, and cancer surveillance. Chronic non-communicable diseases, predominantly type 2 diabetes,

1  
2  
3 cardiovascular disease, chronic lung disease and chronic kidney disease now dominate the  
4 adult health profile and are the focus of most of health service provision for remote-living  
5 Australian Aboriginal adults.<sup>8</sup>  
6

7  
8 Clinical services were established by the mission, starting as first aid facilities on the beach  
9 at Nguuu (now Wurrumiyanga) on Bathurst Island. These eventually evolved into a clinic and  
10 local hospital, run by the Sisters of the Order of Our Lady of Sacred Heart (OLSH), with  
11 additional clinics in the Melville Island communities of Milikapiti and Pirlangimpi. Medical  
12 records were established for individuals, along with clinic-based registers for births and  
13 deaths. Doctors from Darwin eventually provided backup support. More recently, there  
14 have been resident doctors for intermittent periods. Local hospital beds were closed in the  
15 early 1990s, and all persons needing hospital admission were thenceforth streamed to the  
16 Royal Darwin Hospital, transported by small plane. Responsibility for clinical services was  
17 transferred from the mission to the NT government in the early/mid-1990s.  
18  
19

20  
21  
22 Anthropologist Charles Hart enumerated a Tiwi population of 1,062 in 1928.<sup>3</sup> Dr John  
23 Hargrave estimated the Tiwi population at about 800 to 900 in 1957, compatible with a  
24 1954 Commonwealth Government estimate of 920.<sup>9,10</sup> Regular government census  
25 estimates have been published every five years since 1986.  
26  
27

28  
29 Traditionally, Tiwi people have only occasionally transmigrated, usually for purposes of  
30 intermarriage according to tribal edicts. The destinations of people who travel, and the  
31 movements and locations of community members, are known by all. Deaths of people who  
32 die out of community (usually in Darwin or while visiting other communities) are  
33 documented in their medical records on in their “home” community clinic and added to the  
34 death register.  
35  
36

37  
38 Death rates in the Tiwi community, along with those in Aboriginal people in Arnhem Land,  
39 have among been the highest in Australia: in the 1990s, with age-standardisation, they were  
40 six times those of the Australian mainstream.<sup>11</sup> Cases of kidney failure began to attract  
41 attention in the 1980s;<sup>12</sup> for several decades Tiwi people had the highest rates of renal  
42 failure yet described, and the first hemodialysis unit in a remote Aboriginal location was  
43 established in Wurrumiyanga on Bathurst Island in the late 1990s. We have previously  
44 described the high rates of low birthweight in this community and the risk exacerbations for  
45 natural deaths in infants, children and young adults associated with low birthweight.<sup>13,14</sup>  
46  
47  
48

## 49 **Methods**

50  
51 Data sources were the written logs of deaths maintained by the clinics, dialysis unit records  
52 of NT Renal Services, and in this staunchly Catholic community, records maintained by the  
53 parish priests of all funerals and burials. We report recorded deaths over the 51 year period  
54 from 1960 to 2010, beginning when clinic recording of details of death (age, date and  
55 explanation) was becoming more systematic.  
56  
57  
58  
59  
60

1  
2  
3 Starting in the 1980s, maintenance dialysis has been available to Tiwi persons with end-  
4 stage renal disease; numbers of patients starting treatment increased steadily until  
5 apparently stabilising at about 6 persons a year in the early 2000s. In this study, initiation of  
6 dialysis is considered a natural (renal) death, occurring when dialysis began, because  
7 without that treatment all participants would have died shortly thereafter.  
8  
9

10 Description of cause of death became more detailed over time. In the early years the only  
11 discrimination for some deaths was of natural versus unnatural causes, while, in later years,  
12 there was more detailed narrative on cause(s) and associations of death. In the early years,  
13 deaths in people over 60 years of age often received a causal assignment of “old age” or  
14 “debility”, but with time “disease or organ-specific” assignments increased for them as well.  
15 In the context of sometimes sparse clinical detail, and conforming to the methodology for  
16 the Global Burden of Disease study, we derived and assigned a principal cause of death only.  
17  
18  
19

20 Unnatural deaths, or deaths of misadventure, included those due to accidents, drownings,  
21 fire (burns and smoke inhalation), homicide, suicide, poisonings, jelly fish stings, crocodile  
22 and shark attacks etc. We defined the main categories of natural deaths as cardiovascular  
23 (heart attack, congestive heart failure, ischemic heart disease, coronary artery disease and  
24 stroke), respiratory (chronic lung disease, chronic obstructive airways disease, chronic  
25 bronchitis, bronchiectasis, pneumonia), renal (death with terminal renal failure, and also,  
26 after 1985, institution of dialysis in people with terminal renal failure), various other causes  
27 (eg sepsis, liver failure, lupus, cancer etc.), and debility or old age. When there was  
28 uncertainty about deaths or persons, data were checked with several senior community  
29 members, who had lived through much of the study interval and had known most  
30 community members.  
31  
32  
33  
34  
35

36 Analyses were conducted using Stata 14 (StataCorp. 2015. *Stata Statistical Software:  
37 Release 14*. College Station, TX: StataCorp LP). Numbers and rates of deaths were calculated  
38 by age-group and cause of death. Five-year moving averages were created using the  
39 tssmooth package. Mortality rates, per 100,000 population, could be calculated only since  
40 1986, the first year of the subsequent quinquennial national census that specifically  
41 enumerated Aboriginal Tiwi people. Total population estimates were also taken from census  
42 figures.<sup>15</sup>  
43  
44  
45  
46

### 47 **Patient involvement**

48 This study has retrospectively reviewed combined records of forerunning studies. There was  
49 no direct contact with patients or individuals. No patients were involved in setting the  
50 research questions or the outcome measures, nor were they involved in developing plans  
51 for recruitment, design, or implementation of the study. No patients were asked to advise  
52 on interpretation or writing up of results.  
53  
54  
55  
56  
57  
58  
59  
60

## Results

1,190 deaths were recorded, and age was documented or age group could be inferred in 1,156 (97.1%) of these (for 95.0% of deaths in the first two decades, and 98.6% of deaths in the last three decades).

Of these 1,156 deaths, 222 were in infants and children (<1 years and 1 to <15 years respectively), and 934 (78.5%) were deaths of adults (at ages  $\geq 15$  years). Twenty-five (11.3%) deaths of infants and children were deaths of misadventure and 197 (88.7%) were of natural causes. Among adults, 114 (12.2%) of deaths were due to misadventure and 820 (87.8%) were natural deaths.

Figure 2 shows deaths by age-group and interval. Early on, most deaths were in infants and children. These fell rapidly at first, then more slowly. The main categories of death in infants and children were diarrhoea, respiratory disease and failure to thrive, with some cases of sudden infant death, and a few congenital abnormalities.<sup>13</sup> In 1973, a house fire killed six siblings, making a major contribution to deaths due misadventure in this group.

As infant and childhood deaths fell, numbers of deaths of adults increased. Many of these have been among young adults (ages 15 to <49 years) with high numbers of both natural death and deaths of misadventure. The latter include motor vehicle accidents, drownings, homicide, and suicide; there were 50 suicides between 1985 and 2010, of which 47 (94%) were among males.

Most deaths are now in people of  $\geq 45$  years, and most of these are of natural causes. The numbers have not perceptibly increased since the early 1990s. Only 2.6% of these older adult deaths were due to misadventure.

Figure 3 shows the trends in natural deaths in adults over time, by primary causal assignment. Numbers peaked in the later 1980s but have since had an indeterminate or falling trend. Through the mid-1980s there were substantial numbers of natural deaths with no further details and deaths with assignments of "old age" or debility", but there have been more "organ-system" assignments since the early 1990s. Among specific assignments, cardiovascular deaths, and cancer/liver/other deaths were represented over the continuum, while pulmonary (respiratory) deaths became prominent but more recently have been decreasing. Renal deaths become prominent in the 1980s; there were 25 renal deaths in the 1980s, 42 in the 1990s and 52 from 2000 to 2009, constituting 14.7, 24.1 and 31.7% of all natural deaths in those intervals.

Figures 4 A-C show the smoothed estimated rates of natural deaths by age-group since 1986.<sup>15</sup> Rates of death in infants and children have fallen remarkably. There was an early increase in death rates among young adults, followed by a progressive decline since the early 1990s. Death rates of people age  $\geq 45$  years have markedly declined, at least until the



1  
2  
3 last few years of the observation interval. The net effect of all these changes is a decrease  
4 overall death rates of the entire population.  
5

6 These trends are further summarised in Table 1, which shows the rates of natural deaths by  
7 age-group in the first and last 5-year blocks of the observation interval. Death rates of  
8 infants and children fell by 89.5%, those of young adults fell by 23.5%, while of people age  
9  $\geq 45$  years fell by 65.1%. For the population as a whole, rates of natural death fell by 52.2%.  
10  
11

12 Figures 5 A-D show that the population age structure has changed over <40 years to include  
13 higher numbers and proportions of young and middle age adults.<sup>15,16</sup> In addition, the size of  
14 the total population has increased by 85%.  
15  
16

## 17 Discussion

18 This is the most complete description of deaths in any indigenous Australian community. It  
19 shows a profound change in patterns, rates and causes of death over a 51 year interval.  
20 Infant and childhood deaths have fallen dramatically; now most people die as adults ( $\geq 15$   
21 years), and of natural causes. Furthermore, in the last 25 years, rates of natural deaths of  
22 adults have been falling. The population is increasing and is progressively ageing.  
23  
24

25 With continued improvements in prevention and treatment of infectious diseases, adult  
26 deaths are increasingly due to non-communicable diseases, with chronic lung disease,  
27 cardiovascular disease and renal disease making the greatest contribution. These chronic  
28 diseases have usually overlapped and been co-contributors to death, although this is  
29 obscured by our use of mutually exclusive categories of primary cause of adult death.  
30 Among specific assignments, cardiovascular deaths, and cancer/liver/other deaths etc. have  
31 been represented over several decades, while pulmonary deaths became prominent in the  
32 1970s, but have decreased since the early 1990s. Kidney failure has become prominent  
33 since the 1980s, and is now the single leading assignment.  
34  
35

36 The improving but still excessive rates of natural deaths are, in large part, the  
37 representation of the "Barker hypothesis".<sup>17</sup> We have shown that the dramatic reductions in  
38 early life mortality have been experienced across the birthweight spectrum, so that, against  
39 a background of seriously low birthweights, large cohorts of underweight infants, who were  
40 previously at greatest risk for early death, have now survived to adult life. As adults, they  
41 have enhanced susceptibility to chronic disease, as the hypothesis proposes and as we have  
42 demonstrated.<sup>13,18,19</sup> Through 2010, rates of natural adult deaths before the age of 41 years  
43 in the Tiwi populations was twice that of those with higher birthweights, with the greatest  
44 accentuation of risk being for pulmonary deaths, a 6-fold increase (Med J Aust, submitted  
45 Jan 2017).<sup>14</sup>  
46  
47

48 The continued evolution of the chronic disease rates and patterns and rates over time is  
49 probably influenced by improving birthweights, changing age structure among adults,  
50 improved prevention, screening and management of chronic disease and changes in  
51  
52  
53  
54  
55  
56  
57  
58  
59  
60

1  
2  
3 competing causes of deaths. With reductions in deaths from pulmonary disease and  
4 postponement of cardiovascular deaths, flowing from a secular increase in birthweights,<sup>13</sup>  
5 and from better medical management, coexisting nephropathy has more opportunity to  
6 pursue its more leisurely course to renal failure.<sup>20</sup>  
7  
8

9  
10 Availability and use of the clinic-based death records and the supporting parish burial  
11 records sets this study apart. The NT-wide government register of deaths dates only back to  
12 the mid-1980s, and in that register, community assignment has sometimes been  
13 incomplete. Moreover, government records do not capture the full burden of renal failure,  
14 due to deficient documentation of a renal cause of death, both in people receiving renal  
15 replacement therapy (RRT), and in those dying of renal failure without receiving RRT.<sup>21,22</sup>  
16 Our composite definition of “renal deaths” as the start of RRT and a renal death without RRT  
17 more fully reveals the burden of renal failure disease. That approach is necessary for  
18 monitoring, prevention and intervention strategies, especially in the context of the burden  
19 and costs of RRT.<sup>23,24</sup> Furthermore, it is the only way that kidney failure rates can be  
20 compared with populations in other countries for whom RRT is not widely available.  
21  
22  
23

24  
25 Our data also reveal an excess of deaths by misadventure in young adults in more recent  
26 years. Such deaths, often alcohol or drug-fuelled, are prominent among young Aboriginal  
27 adults nationwide, and are of grave concern.<sup>25,26</sup>  
28  
29

30  
31 Limitations include the fact that some Tiwi deaths were probably not captured in our data  
32 sources. This is more likely in the earlier years, so that that the earlier numbers and rates of  
33 deaths, as well as the subsequent fall in deaths, have probably been understated.  
34 Moreover, from 1985 to 2009, the government agencies recorded 18% fewer deaths for the  
35 Tiwi community than we have recorded, with under-identification varying from 10 to 30%  
36 over five consecutive 5 years intervals (In an email from Y Zhao, ([yuejen.zhao@nt.gov.au](mailto:yuejen.zhao@nt.gov.au))  
37 2016 Oct 24). An additional limitation is assignment of a single category of cause of death,  
38 whereas natural deaths in adults have multiple causes and associated conditions; the  
39 coexistence of cardiovascular risk and lung disease, and of renal disease with cardiovascular  
40 disease are well recognised. However, the use of a single underlying cause of death is  
41 dictated by the detail of the source data. It is also the approach employed until recently for  
42 the mortality component of the study of Global Burden of Disease.  
43  
44  
45  
46

47  
48 Is it credible that about half the deaths in Tiwi people in the 1960s were in subjects less than  
49 15 years of age? The World Health Organization estimated that, in 1955, fully 40% of global  
50 deaths were in children age <5 years, so presumably an even greater proportion were  
51 deaths of people <15 year old).<sup>27</sup> Furthermore, analyses of skeletal remains of some  
52 premodern cultures have suggested that up to 68% of deaths occurred people <15 years old  
53 (Chamberlain cited in Roser, 2006).<sup>1,28</sup> Hart’s comment that, around 1928, five of 15  
54 bestowed wives (females promised in marriage to specific Tiwi community members), died  
55 before puberty, supports a high childhood mortality.<sup>3</sup>  
56  
57  
58  
59  
60

1  
2  
3 Other Aboriginal groups in remote areas of Australia over the same intervals have  
4 undoubtedly experienced similar transitions. NT government agencies have described  
5 similar trends in early life mortality since 1967, and improvements in natural death rates  
6 overall since the late 1980s (Figures 6 and 7).<sup>29</sup> In the Shire of Broome, Western Australia,  
7 Gracey et al. described excessive levels of Aboriginal infant and childhood infection and  
8 under-nutrition in the 1970s and 1980s and increasing deaths by misadventure in young  
9 Aboriginal adults between 1971 and 1994.<sup>30</sup> Our findings are also consistent with events in  
10 many other countries and regions. Figure 8 shows the fall in early life mortality since 1960,  
11 which is most dramatic in disadvantaged populations like Yemen, Afghanistan, Bangladesh  
12 and Nepal,<sup>31</sup> while Figure 9 shows the simultaneous increase in life expectancy at birth,  
13 again most marked in disadvantaged settings.<sup>32</sup> Our Tiwi data show that the improvement in  
14 life expectancy is a function of reduced early life mortality as well as increasing adult  
15 longevity.  
16  
17  
18  
19  
20  
21

22 These changes represent triumphs of inter-sectoral improvements, public health policy and  
23 health care more broadly, which are to be celebrated. This is especially welcome news for  
24 the Tiwi Aboriginal people, whose mortality rates have been the worst in Australia,<sup>11</sup> and for  
25 remote-living Aboriginal people more broadly. It is also comforting for health care providers  
26 and policy makers to see such large scale progress demonstrated through an historical  
27 perspective, and should support resolve to stay the course in ongoing improvements.<sup>8</sup> More  
28 broadly, this information should moderate the negative discourse which has pervaded the  
29 Aboriginal health literature.  
30  
31  
32

33 Encouraging as these trends are, further improvement in adult death rates can still be  
34 anticipated. Birthweights continue to improve, so that accentuated chronic disease risk from  
35 that source should decline; adult health services continue to improve, especially in  
36 prevention, screening and management of chronic disease,<sup>8</sup> and rates of smoking are  
37 falling.<sup>33</sup> Continuing challenges, however, include high rates of obesity,<sup>34</sup> poor diet,  
38 especially sugar excess,<sup>35</sup> drug use, alcohol abuse, and foetal alcohol syndrome.<sup>7</sup>  
39 Interpersonal violence, especially high rates of suicide and accidents, remain serious  
40 challenges. Efforts to improve education, skills training, employment opportunities,  
41 empowerment and socioeconomic status must be unflagging and be robustly supported.  
42  
43  
44  
45  
46  
47  
48  
49  
50  
51  
52  
53  
54  
55  
56  
57  
58  
59  
60

1  
2  
3 Acknowledgements: We are very grateful to Tiwi Land Council and the Tiwi people for their  
4 continuing support of this research. We specifically acknowledge the expertise and  
5 dedication of the sisters of the order of Our Lady of the Sacred Heart (OLSH) who  
6 maintained fastidious clinical records which now underlie much of this report. We are  
7 grateful to the clinic staff in the communities of Wurrumiyanga (previously known as Ngiuu)  
8 on Bathurst Island, and of Milikapiti and Pirlangimpi on Melville Island. We thank the  
9 Catholic Diocese of Darwin for allowing access to the medical records, and supplying records  
10 of deaths and burial recorded by the parish. We thank NT Renal Services for supplying  
11 records of Tiwi people who started dialysis. We thank Centre of Chronic Disease staff for  
12 their contribution to data management and analyses throughout the course of this and  
13 related projects.  
14  
15  
16  
17  
18

19 Contributors: WH conceived and designed this work, collected data, directed data analyses,  
20 interpreted the findings and wrote the manuscript. BMcL conducted field work, and  
21 performed data collection and data preparation. SM prepared data, performed analyses and  
22 contributed to interpretation, produced figures and tables, and coordinated preparation  
23 and editing of the manuscript. All authors had full access to all of the data in the study and  
24 can take responsibility for the integrity of the data and the accuracy of the data analysis. All  
25 authors reviewed, revised and approved the manuscript.  
26  
27  
28  
29

30 Funding: This work has been supported by past grants from the National Health and Medical  
31 Research Council of Australia (NHMRC); #511081, #921134, #951250 and #951342, and  
32 from the Colonial Foundation of Australia. It is currently supported by the NHMRC Centre of  
33 Research Excellence in Chronic Kidney Disease in Australia; # 1079502. Past grants have  
34 specifically supported patient recruitment, data collection and data management of a  
35 broader study within which this study is embedded. Current support has enabled analyses  
36 and preparation of this manuscript. The funders had no role in preparation or conduct of  
37 the study or writing or submission of the manuscript.  
38  
39  
40  
41

42 Competing interests: All authors have completed the ICMJE uniform disclosure form  
43 at [http://www.icmje.org/coi\\_disclosure.pdf](http://www.icmje.org/coi_disclosure.pdf) and declare: no support from any organisation  
44 for the submitted work; no financial relationships with any organisations that might have an  
45 interest in the submitted work in the previous three years; no other relationships or  
46 activities that could appear to have influenced the submitted work.  
47  
48  
49

50 Transparency: The lead author affirms that the manuscript is an honest, accurate, and  
51 transparent account of the study being reported; that no important aspects of the study  
52 have been omitted; and that any discrepancies from the study as planned have been  
53 explained.  
54  
55  
56  
57  
58  
59  
60

1  
2  
3  
4  
5  
6  
7  
8  
9  
10  
11  
12  
13  
14  
15  
16  
17  
18  
19  
20  
21  
22  
23  
24  
25  
26  
27  
28  
29  
30  
31  
32  
33  
34  
35  
36  
37  
38  
39  
40  
41  
42  
43  
44  
45  
46  
47  
48  
49  
50  
51  
52  
53  
54  
55  
56  
57  
58  
59  
60

Ethical approval: Human Research Ethics Committee of the Northern Territory Department of health and Community Services and Menzies School of Health Research (91/20, 94/02 and 03/51).

For peer review only

## References

1. Roser M. Population: Life Expectancy. Child Mortality. [cited 2016 Aug 18]. Available from: <http://ourworldindata.org/>
2. Lorenzo R, Naghavi M, Foreman K, Lim S, Shibuya K, Aboyans V et al., Global and regional mortality from 235 causes of death for 20 age groups in 1990 and 2010: a systematic analysis for the Global Burden of Disease Study 2010. *The Lancet* 2012;380(9858):2095–2128.
3. Hart CWM, Pilling AR, Goodale JC. *The Tiwi of North Australia*. New York: Holt, Rinehart and Winston; 1988.
4. National Archives of Australia. Bishop Francis Xavier Gsell MSC-Fact sheet 151. National Archives of Australia: 2016 [cited 2016, July 7]. Available from: <http://www.naa.gov.au/collection/fact-sheets/fs151.aspx>
5. Commonwealth of Australia. Handbook of the 44th Parliament (2014) "Part 5 - Referendums and Plebiscites - Referendum results". Parliamentary Library of Australia. [cited 2016 Dec 26 ]. Available from: [http://parlinfo.aph.gov.au/parlInfo/download/handbook/newhandbook/2014-10-31/toc\\_pdf\\_repeat/Part%205%20-%20Referendums%20and%20Plebiscites.pdf;fileType=application%2Fpdf](http://parlinfo.aph.gov.au/parlInfo/download/handbook/newhandbook/2014-10-31/toc_pdf_repeat/Part%205%20-%20Referendums%20and%20Plebiscites.pdf;fileType=application%2Fpdf)
6. Kettle E. *Health Services in the Northern Territory – a history 1824-1970. Volume 2*. Australian National University. North Australia Research unit, Darwin; 1991. [cited 2016 Aug 18]. Available from: <https://digitalcollections.anu.edu.au/handle/1885/46992>
7. Hargrave, John C. *The best of both worlds: Aboriginal health then and now. The Seventh Eric Johnston Lecture, 1992. Occasional papers; no. 36*. State Library of the Northern Territory, Darwin; 1993 [cited 2016 Aug 18]. Available from: [https://www.nt.gov.au/\\_\\_data/assets/pdf\\_file/0008/241892/occpaper36.pdf](https://www.nt.gov.au/__data/assets/pdf_file/0008/241892/occpaper36.pdf)
8. Hoy WE. Chronic disease care in remote Aboriginal Australia has been transformed. *Personal View, BMJ* 2013; 347:f6127. doi: <http://dx.doi.org/10.1136/bmj.f6127>
9. Hargrave J. *Medical survey of the Bathurst Island Mission. March-May 1957. Report to the NT Department of health, 1957*. Darwin: Australian Archives, 1957.
10. Commonwealth of Australia. *The Northern Territory Report: 1953-1955*. Commonwealth Government, Canberra; 1956 [cited 2016 Aug 23]. Available from: [http://aiatsis.gov.au/sites/default/files/catalogue\\_resources/59270.pdf](http://aiatsis.gov.au/sites/default/files/catalogue_resources/59270.pdf)
11. Jain SK, editor. *Trends in mortality by causes of death in Australia, the States and Territories during 1971-1992, and in statistical subdivisions during 1991-1992. Cat. No. 3313.0. National Centre for Epidemiology and Population Health and Australian Bureau of Statistics, Canberra, 1994* [cited 2016 Aug 18]. Available from: [http://www.ausstats.abs.gov.au/ausstats/free.nsf/0/8C850BD253D26CE3CA2572250049511/\\$File/33130\\_1971-92.pdf](http://www.ausstats.abs.gov.au/ausstats/free.nsf/0/8C850BD253D26CE3CA2572250049511/$File/33130_1971-92.pdf)
12. Spencer JS, Silva D, Snelling P, Hoy WE. An epidemic of renal failure among Australian Aborigines. *Med J Aust* 168:537–541, 1998.

13. Hoy WE, Nicol JL. Birthweight and natural deaths in a remote Australian Aboriginal community. *Med J Aust.* 2010; 192(1): 14-19.
14. Hoy WE, Nicol JL. The Barker hypothesis confirmed: Association of low birthweight and all- cause natural deaths in adults in a remote Australian Aboriginal community. Submitted to the *Med J Aust*, January, 2016.
15. Australian Bureau of Statistics. Historical Reference and Information. ABS, Commonwealth of Australia, 11 Sept 2013 [cited 2016 Sep 11]. Available from: <http://www.abs.gov.au/websitedbs/censushome.nsf/home/historicalinformation?opendocument&navpos=320>
16. Peterson N, Taylor J. Demographic transition in a hunter-gatherer population the Tiwi case, 1929-1996. *Australian Aboriginal Studies* 1998;1:11-27.
17. Barker DJP, Osmond C, Golding J, et al. Growth in utero, blood pressure in childhood and adult life, and mortality from cardiovascular disease. *Br Med J* 1998;298:564–7.
18. Hoy WE, Rees M, Kile E, Mathews JD, Pugsley DJ, Wang Z. Low birth weight and renal disease in Australian Aborigines. *The Lancet* 352:1826–1827, 1998.
19. Singh GR, Hoy WE. The association between birth weight and current blood pressure: a cross- sectional study in an Australian Aboriginal community. *Med J Aust*, 179:532–535, 2003.
20. Grams ME, Coresh J, Segev DL, Kucirka LM, Tighiouart H, Samak MJ. Vascular Disease, ESRD, and Death: Interpreting Competing Risk Analyses. *Clin J Am Soc Nephrol.* 2012 Oct 5; 7(10): 1606–1614. Published online 2012 Aug 2. doi: [10.2215/CJN.03460412](https://doi.org/10.2215/CJN.03460412)
21. Hoy WE, Mott SA, McDonald, S. An expanded nationwide view of chronic kidney disease in Aboriginal Australians. *Nephrology (Carlton)*. 2016 Apr 14. doi: 10.1111/nep.12798. [Epub ahead of print].
22. Australian Institute of Health and Welfare. Assessment of the coding of ESKD in deaths and hospitalisation data. A working paper using linked hospitalisation and deaths data from Western Australia and New South Wales. Cat. no. PHE 182. Canberra: AIHW; 2014.
23. You J, Hoy WE, Zhao Y, Beaver C, Eager K. End-stage renal disease in the Northern Territory: current and future treatment costs. *Med J Aust* 176(10):461–465, 2002.
24. Australian Indigenous Health/InfoNet. Chronic conditions: Review of kidney disease among Indigenous people. Last update Sept 2015. [cited 2016 Sep 01]. Available from: <http://www.healthinonet.ecu.edu.au/chronic-conditions>
25. Australian Bureau of Statistics. Leading causes of Aboriginal and Torres Strait Islander deaths. 3303.0 Causes of Death, Australia, 2013. Commonwealth of Australia, 2015. [cited 2016 Jan 01]. Available from: <http://www.abs.gov.au/ausstats/abs@.nsf/Lookup/by%20Subject/3303.0~2013~Main%20Features~Leading%20Causes%20of%20Aboriginal%20and%20Torres%20Strait%20Islander%20Deaths~10015>
26. Australian Indigenous Health/InfoNet (2016) Summary of Aboriginal and Torres Strait Islander health, 2015. [cited 2016 Jan 01]. Available from: from <http://www.healthinonet.ecu.edu.au/health-facts/summary>

- 1  
2  
3 27. World Health Organization. 50 Facts: Global health situation and trends 1955-2025.  
4 World Health Report; 2016 [cited 2016 Aug 23]. Available from:  
5 [http://www.who.int/whr/1998/media\\_centre/50facts/en/](http://www.who.int/whr/1998/media_centre/50facts/en/)  
6  
7 28. Hill K. The decline of childhood mortality. John Hopkins University;1990 [cited 2016  
8 Aug 23]. Available from: <https://jscholarship.library.jhu.edu/handle/1774.2/936>  
9  
10 29. Northern Territory Department of Health. Mortality in the Northern Territory 1967-  
11 2006. Factsheet. 2011 [cited 2016, August 26]. Available from:  
12 <http://hdl.handle.net/10137/480>  
13  
14 30. Gracey M, Spargo RM. Deaths in Broome, Western Australia, 1883 to 1994. Aust N Z J  
15 Public Health, 1996; 20: 505-511.  
16  
17 31. UNICEF Global Database. Child Mortality Estimates: country-specific under-five  
18 mortality rate. UNICEF, 2015. [cited 2016 Aug 23]. Available from:  
19 <http://data.unicef.org/child-mortality/under-five.html>  
20  
21 32. The World Bank. Life expectancy at birth, total (years). World development indicators.  
22 World Bank Group IBRD IDA, 2016. [cited 2016 Aug 23]. Available from:  
23 <http://data.worldbank.org/indicator/SP.DYN.LE00.IN> Ditto  
24  
25 33. Australian Bureau of Statistics, National Aboriginal and Torres Strait Islander Social  
26 Survey, 2014-15. Cat no. 4714.0. ABS; 2016 [cited 2016 Aug 23]. Available  
27 from: <http://www.abs.gov.au/ausstats/abs@.nsf/Lookup/4714.0main+features122014-15>  
28  
29  
30 34. Australian Bureau of Statistics. Australian Aboriginal and Torres Strait Islander Health  
31 Survey: Updated results, 2012-2013. Cat no. 4727.0.55.006; 2014 [cited 2016 Aug 23].  
32 Available from:  
33 <http://www.abs.gov.au/ausstats/abs@.nsf/Lookup/by%20Subject/4727.0.55.006~2012%E2%80%9313~Main%20Features~Overweight%20and%20obesity~12>.  
34  
35  
36  
37 35. Hoy WE, Manning RW, Tungatalum L, Hoy PW, Mott SA, Eddy D, Ball PA. A profile of  
38 sales audits of a remote Aboriginal community's general store: 1992 and 2011.  
39 ANZJPH, Letter, 38(1):94. 4 Feb 2014:  
40 <http://onlinelibrary.wiley.com/doi/10.1111/1753-6405.12172/abstract>  
41  
42  
43  
44  
45  
46  
47  
48  
49  
50  
51  
52  
53  
54  
55  
56  
57  
58  
59  
60



## Table

Table 1. Mean (95%CI) natural death rate per 100,000 population by five-year intervals and age-group

| Time interval | <15 years        | 15-44 years      | 45+ years           | All ages           |
|---------------|------------------|------------------|---------------------|--------------------|
| 1986-1990     | 547.4 (406, 689) | 426.3 (240, 613) | 8065.4 (6778, 9353) | 1480.7 (1240,1721) |
| 2006-2010     | 60.5 (-81, 202)  | 326.3 (140, 513) | 2815.2 (1528, 4103) | 716.8 (476,957)    |

Note: The mean of aggregate natural deaths over years 2001-2010 is used for deaths of those <15 years of age.

Sources: 1986-2011 census data, Australian Bureau of Statistics (Catalogues: 1987, #2460.0; 2012,#2002.0).<sup>15</sup>

## Legend of Figures

Figure 1. The Tiwi Islands, Northern Territory, Australia

Note: Wurrumiyanga was formerly named Nguuu.

Source: Adapted from Google Map data. The Tiwi Islands. Google; ©2017 [cited 2017 Jan 10]. Available from: <https://www.google.com.au/maps/@-12.2087082,130.7314414,8.75z>

Figure 2. Numbers of Tiwi deaths by age-group and broad cause of death, 1960-2010

Note: A five-year rolling average of frequencies is presented; people who have started dialysis are included among natural deaths.

Figure 3. Numbers of Tiwi natural adult deaths by age-group and cause of death, 1960-2010

Note: A five-year rolling average of frequencies is presented; people who have started dialysis are included among renal deaths.

Figures 4 A-C. Tiwi natural death rates by age-group, 1986-2010

Note: A five-year rolling average of rates is presented; population data derivation: 1986-2010 from quinquennial Census estimates (Australian Bureau of Statistics Catalogues: 1987, #2460.0; 1993, #2730.7; 2000, #70609; 2007, #2001.0; 2002, #2002.0; 2012, #2002.0);<sup>15</sup> people who started dialysis are included among natural deaths; the low rates of death depicted for those <15 years from 2003 to 2010 are each based upon the average of the very small number of events (four) that occurred between 2001 and 2010.

Figures 5 A-D. Age distribution of the Tiwi population at four time-points, by sex, 1971-2011

Sources: 1971 data was cited in Peterson, 1988;<sup>16</sup> 1986-2011 census data, Australian Bureau of Statistics (Catalogues: 1987, #2460.0; 2000, #70609; 2012, #2002.0).<sup>15</sup>

**Note for figure formatting – please enter the text given below in the top left of each graph for Figure 5 A-D:**

**A. 1971**

**Total population: 1,221**

**B. 1986**

**Total population: 1,806**

**C. 1996**

**Total population: 2,023**

**D. 2011**

1  
2  
3 **Total population: 2,263**  
4

5 Figure 6. Infant mortality, Northern Territory and Australia, 1967-2007  
6

7 Source: Northern Territory Department of Health, 2011.<sup>29</sup>  
8

9  
10 Figure 7. Leading causes of death in the Aboriginal population of the Northern Territory:  
11 1985-2006  
12

13 Source: Northern Territory Department of Health, 2011.<sup>29</sup>  
14

15 Figure 8. Under-five mortality rates for selected countries, 1960-2015  
16

17 Source: adapted from UNICEF Global Database, 2015.<sup>31</sup>  
18

19 Figure 9. Life expectancy at birth for selected countries, 1960-2013  
20

21 Source: adapted from The World Bank, 2016.<sup>32</sup>  
22

23  
24 Source notes: Derived from male and female life expectancy at birth from sources such as:  
25 United Nations Population Division; World Population Prospects; United Nations Statistical  
26 Division. Population and Vital Statistics Report (various years); Census reports and other  
27 statistical publications from national statistical offices; Eurostat: Demographic Statistics;  
28 Secretariat of the Pacific Community: Statistics and Demography Programme; and U.S.  
29 Census Bureau: International Database.  
30  
31  
32  
33  
34  
35  
36  
37  
38  
39  
40  
41  
42  
43  
44  
45  
46  
47  
48  
49  
50  
51  
52  
53  
54  
55  
56  
57  
58  
59  
60

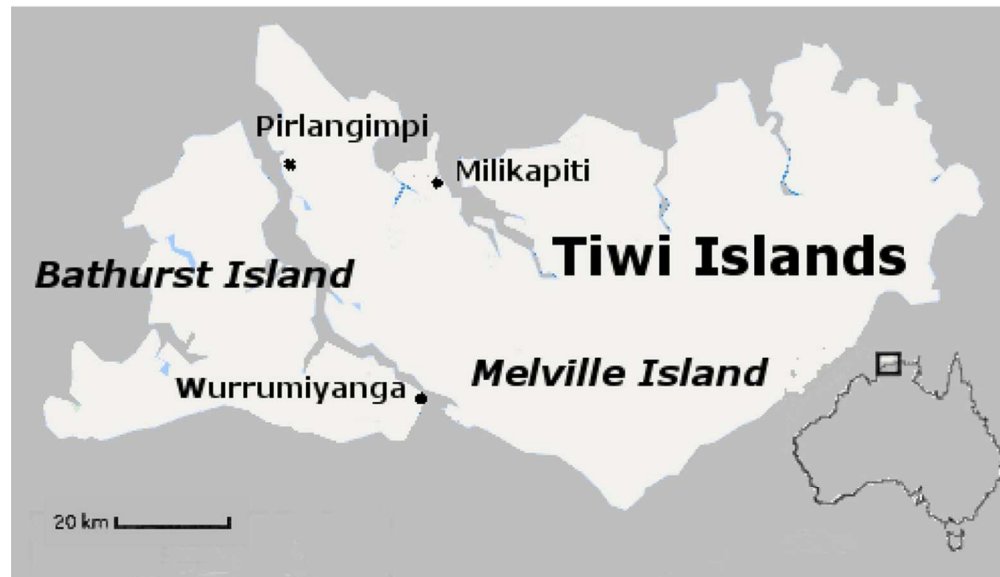

26  
27

Figure 1. The Tiwi Islands, Northern Territory, Australia

Note: Wurrumiyanga was formerly named Nguui.

28  
29  
30

Source: Adapted from Google Map data. The Tiwi Islands. Google; ©2017 [cited 2017 Jan 10]. Available from: <https://www.google.com.au/maps/@-12.2087082,130.7314414,8.75z>

31  
32  
33

100x58mm (300 x 300 DPI)

34  
35  
36  
37  
38  
39  
40  
41  
42  
43  
44  
45  
46  
47  
48  
49  
50  
51  
52  
53  
54  
55  
56  
57  
58  
59  
60

view only

1  
2  
3  
4  
5  
6  
7  
8  
9  
10  
11  
12  
13  
14  
15  
16  
17  
18  
19  
20  
21  
22  
23  
24  
25  
26  
27  
28  
29  
30  
31  
32  
33  
34  
35  
36  
37  
38  
39  
40  
41  
42  
43  
44  
45  
46  
47  
48  
49  
50  
51  
52  
53  
54  
55  
56  
57  
58  
59  
60

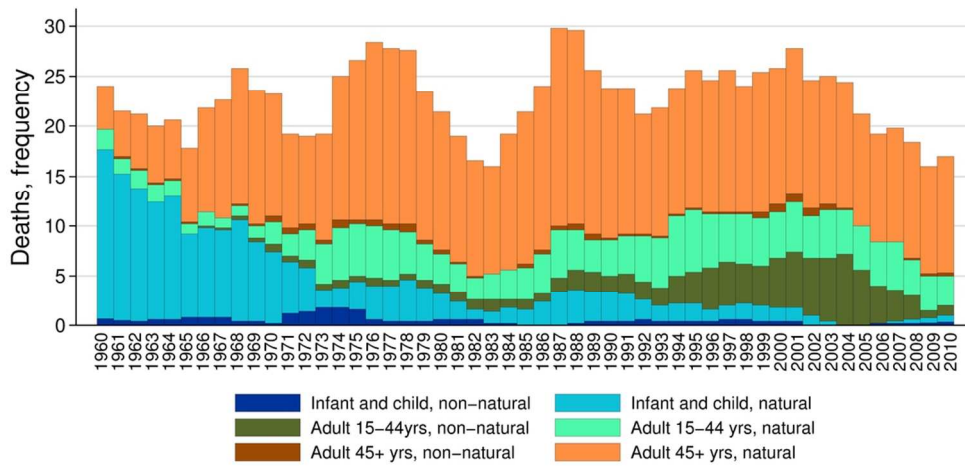

Figure 2. Numbers of Tiwi deaths by age-group and broad cause of death, 1960-2010  
 Note: A five-year rolling average of frequencies is presented; people who have started dialysis are included among natural deaths.

101x50mm (300 x 300 DPI)

Review only

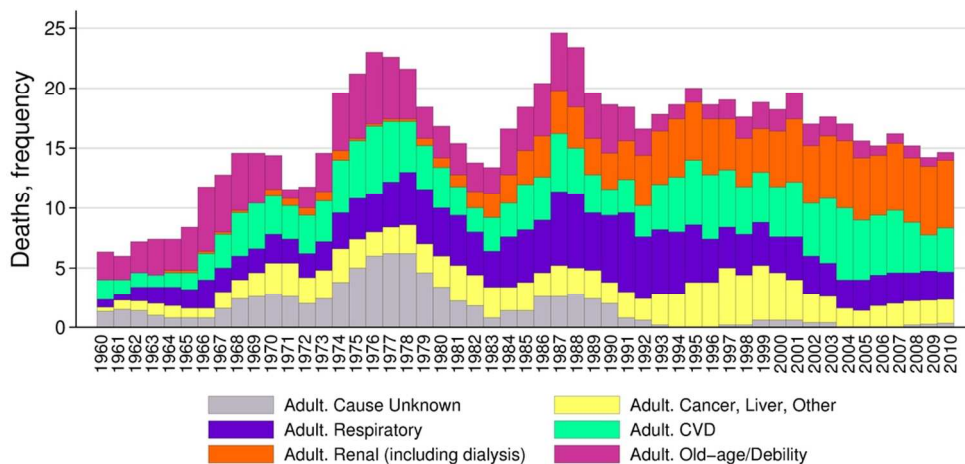

Figure 3. Numbers of Tiwi natural adult deaths by age-group and cause of death, 1960-2010  
 Note: A five-year rolling average of frequencies is presented; people who have started dialysis are included among renal deaths.

101x50mm (300 x 300 DPI)

Review only

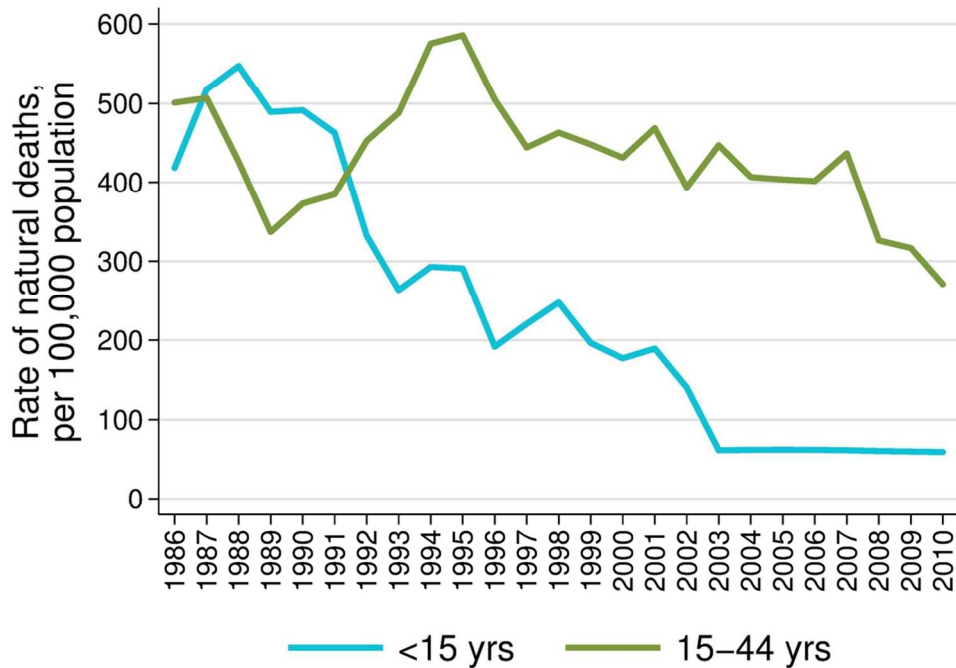

Figures 4 A-C. Tiwi natural death rates by age-group, 1986-2010

Note: A five-year rolling average of rates is presented; population data derivation: 1986-2010 from quinquennial Census estimates (Australian Bureau of Statistics Catalogues: 1987, #2460.0; 1993, #2730.7; 2000, #70609; 2007, #2001.0; 2002, #2002.0; 2012, #2002.0); 15 people who started dialysis are included among natural deaths; the low rates of death depicted for those <15 years from 2003 to 2010 are each based upon the average of the very small number of events (four) that occurred between 2001 and 2010.

101x73mm (300 x 300 DPI)

only

1  
2  
3  
4  
5  
6  
7  
8  
9  
10  
11  
12  
13  
14  
15  
16  
17  
18  
19  
20  
21  
22  
23  
24  
25  
26  
27  
28  
29  
30  
31  
32  
33  
34  
35  
36  
37  
38  
39  
40  
41  
42  
43  
44  
45  
46  
47  
48  
49  
50  
51  
52  
53  
54  
55  
56  
57  
58  
59  
60

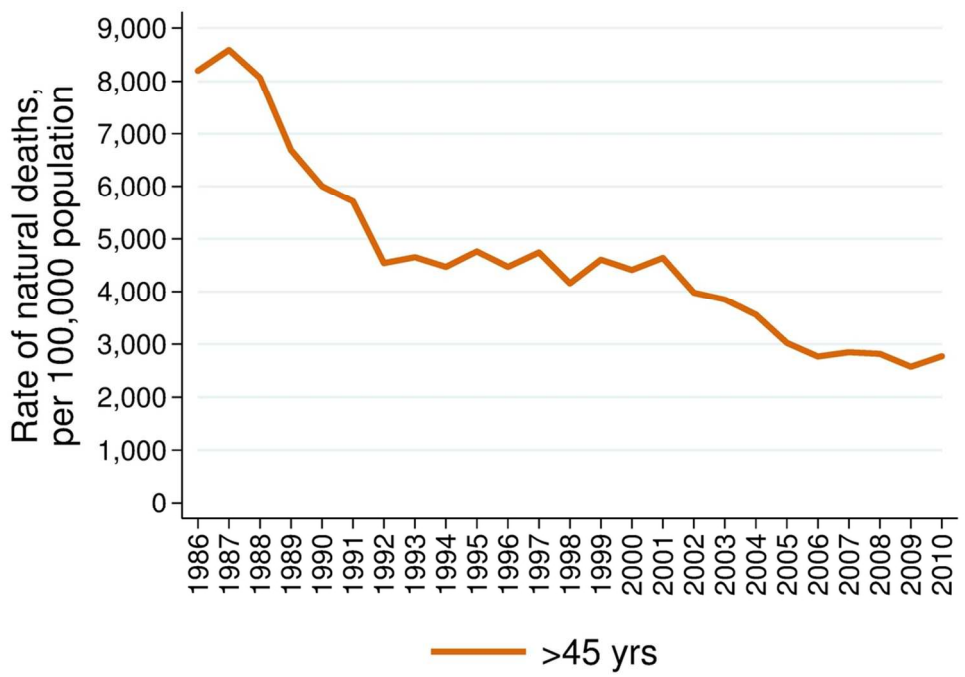

Figures 4 A-C. Tiwi natural death rates by age-group, 1986-2010  
 Note: A five-year rolling average of rates is presented; population data derivation: 1986-2010 from quinquennial Census estimates (Australian Bureau of Statistics Catalogues: 1987, #2460.0; 1993, #2730.7; 2000, #70609; 2007, #2001.0; 2002, #2002.0; 2012, #2002.0); 15 people who started dialysis are included among natural deaths; the low rates of death depicted for those <15 years from 2003 to 2010 are each based upon the average of the very small number of events (four) that occurred between 2001 and 2010.

101x73mm (300 x 300 DPI)

only



1  
2  
3  
4  
5  
6  
7  
8  
9  
10  
11  
12  
13  
14  
15  
16  
17  
18  
19  
20  
21  
22  
23  
24  
25  
26  
27  
28  
29  
30  
31  
32  
33  
34  
35  
36  
37  
38  
39  
40  
41  
42  
43  
44  
45  
46  
47  
48  
49  
50  
51  
52  
53  
54  
55  
56  
57  
58  
59  
60

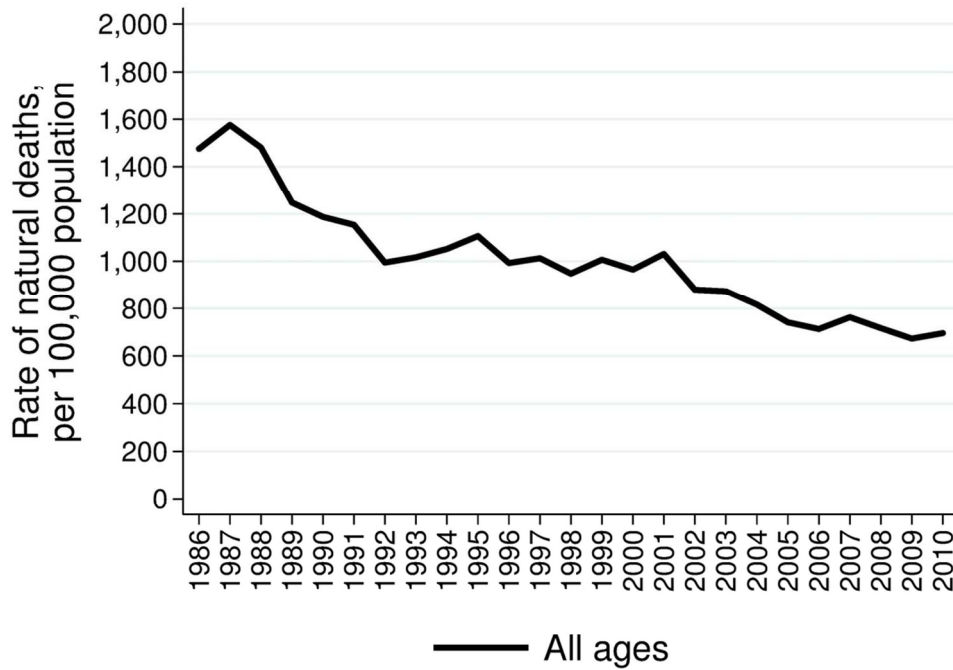

Figures 4 A-C. Tiwi natural death rates by age-group, 1986-2010

Note: A five-year rolling average of rates is presented; population data derivation: 1986-2010 from quinquennial Census estimates (Australian Bureau of Statistics Catalogues: 1987, #2460.0; 1993, #2730.7; 2000, #70609; 2007, #2001.0; 2002, #2002.0; 2012, #2002.0); 15 people who started dialysis are included among natural deaths; the low rates of death depicted for those <15 years from 2003 to 2010 are each based upon the average of the very small number of events (four) that occurred between 2001 and 2010.

101x73mm (300 x 300 DPI)

only

1  
2  
3  
4  
5  
6  
7  
8  
9  
10  
11  
12  
13  
14  
15  
16  
17  
18  
19  
20  
21  
22  
23  
24  
25  
26  
27  
28  
29  
30  
31  
32  
33  
34  
35  
36  
37  
38  
39  
40  
41  
42  
43  
44  
45  
46  
47  
48  
49  
50  
51  
52  
53  
54  
55  
56  
57  
58  
59  
60

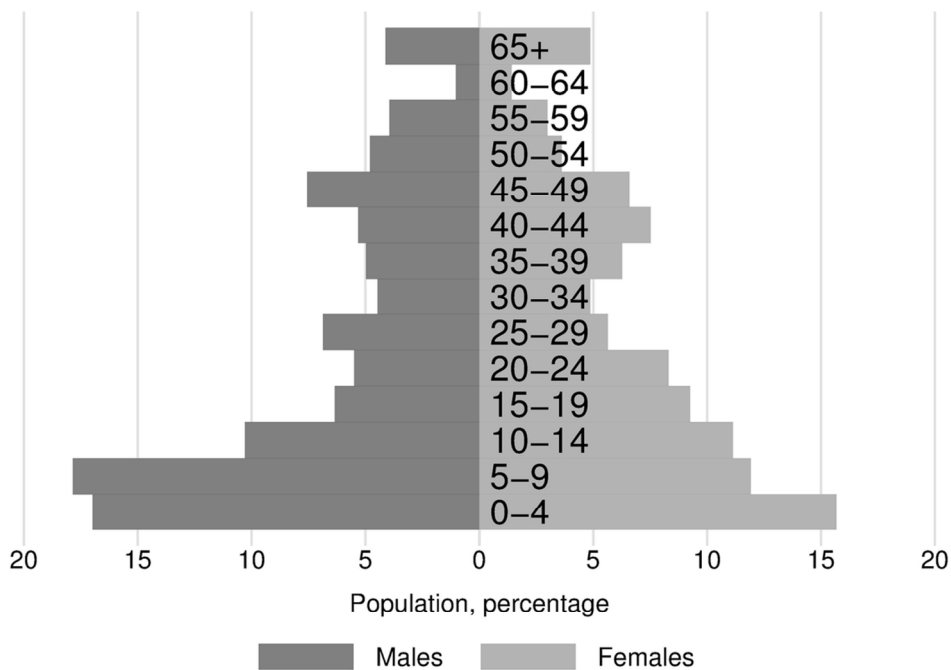

Figures 5 A-D. Age distribution of the Tiwi population at four time-points, by sex, 1971-2011  
Sources: 1971 data was cited in Peterson, 1988; 16 1986-2011 census data, Australian Bureau of Statistics  
(Catalogues: 1987, #2460.0; 2000, #70609; 2012, #2002.0).15

101x73mm (300 x 300 DPI)

For peer review only

1  
2  
3  
4  
5  
6  
7  
8  
9  
10  
11  
12  
13  
14  
15  
16  
17  
18  
19  
20  
21  
22  
23  
24  
25  
26  
27  
28  
29  
30  
31  
32  
33  
34  
35  
36  
37  
38  
39  
40  
41  
42  
43  
44  
45  
46  
47  
48  
49  
50  
51  
52  
53  
54  
55  
56  
57  
58  
59  
60

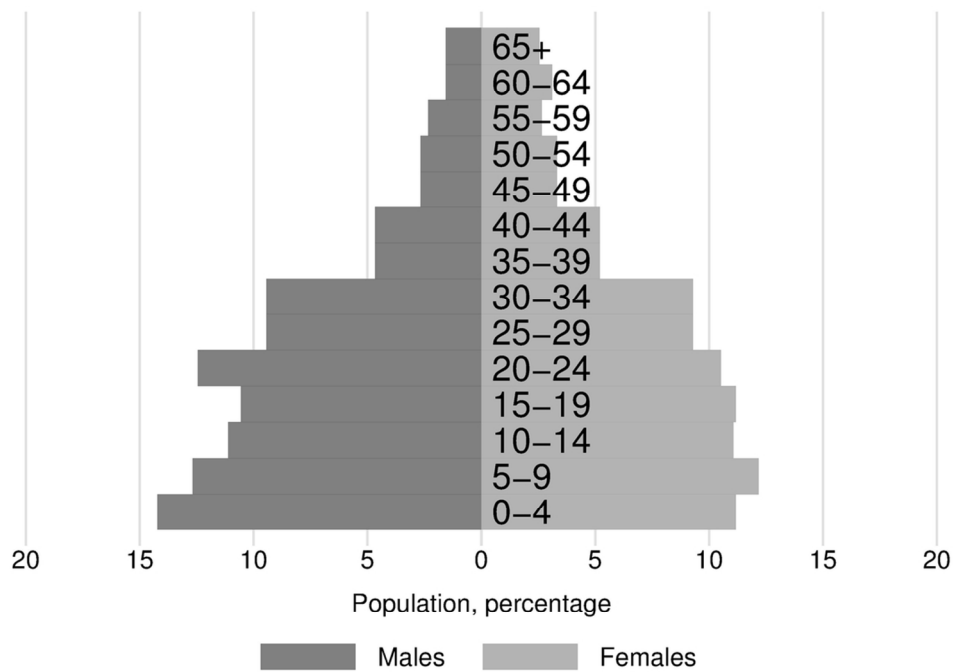

Figures 5 A-D. Age distribution of the Tiwi population at four time-points, by sex, 1971-2011  
 Sources: 1971 data was cited in Peterson, 1988; 16 1986-2011 census data, Australian Bureau of Statistics  
 (Catalogues: 1987, #2460.0; 2000, #70609; 2012, #2002.0).15

101x73mm (300 x 300 DPI)

For peer review only

1  
2  
3  
4  
5  
6  
7  
8  
9  
10  
11  
12  
13  
14  
15  
16  
17  
18  
19  
20  
21  
22  
23  
24  
25  
26  
27  
28  
29  
30  
31  
32  
33  
34  
35  
36  
37  
38  
39  
40  
41  
42  
43  
44  
45  
46  
47  
48  
49  
50  
51  
52  
53  
54  
55  
56  
57  
58  
59  
60

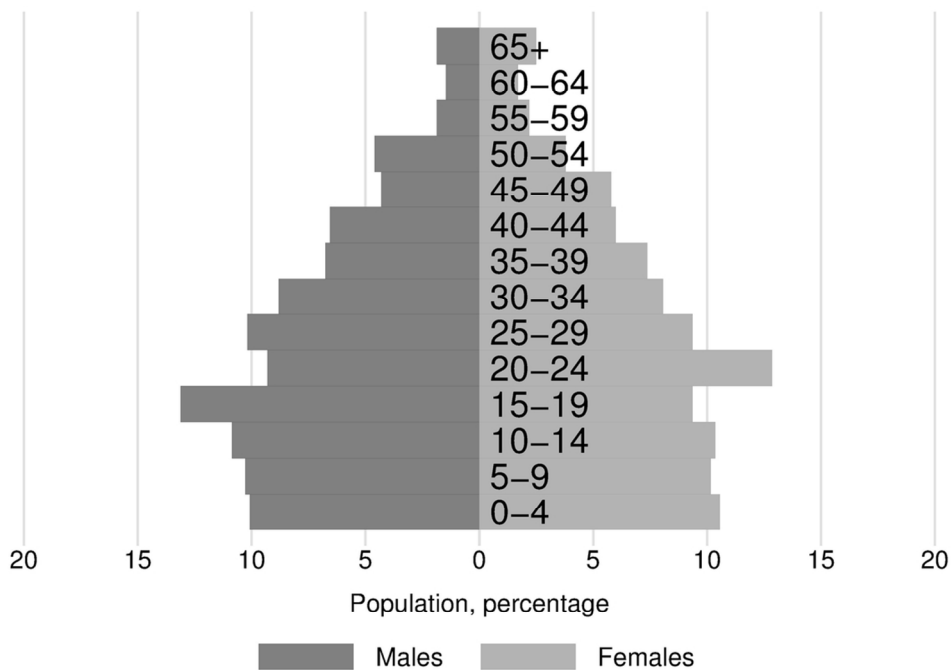

Figures 5 A-D. Age distribution of the Tiwi population at four time-points, by sex, 1971-2011  
Sources: 1971 data was cited in Peterson, 1988; 16 1986-2011 census data, Australian Bureau of Statistics (Catalogues: 1987, #2460.0; 2000, #70609; 2012, #2002.0).15

101x73mm (300 x 300 DPI)

For peer review only

1  
2  
3  
4  
5  
6  
7  
8  
9  
10  
11  
12  
13  
14  
15  
16  
17  
18  
19  
20  
21  
22  
23  
24  
25  
26  
27  
28  
29  
30  
31  
32  
33  
34  
35  
36  
37  
38  
39  
40  
41  
42  
43  
44  
45  
46  
47  
48  
49  
50  
51  
52  
53  
54  
55  
56  
57  
58  
59  
60

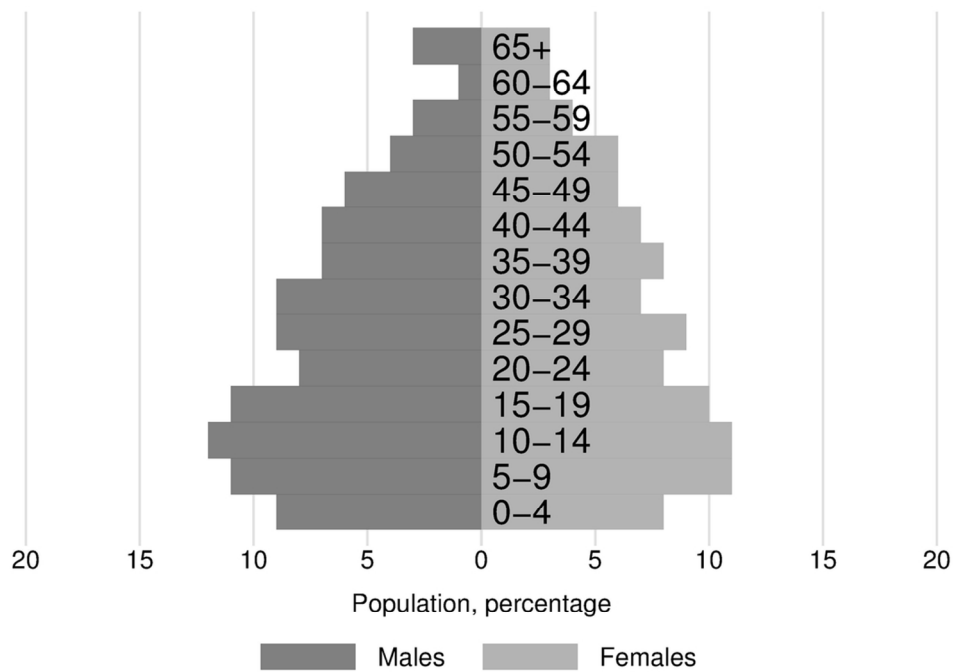

Figures 5 A-D. Age distribution of the Tiwi population at four time-points, by sex, 1971-2011  
 Sources: 1971 data was cited in Peterson, 1988; 16 1986-2011 census data, Australian Bureau of Statistics  
 (Catalogues: 1987, #2460.0; 2000, #70609; 2012, #2002.0).15

101x73mm (300 x 300 DPI)

For peer review only

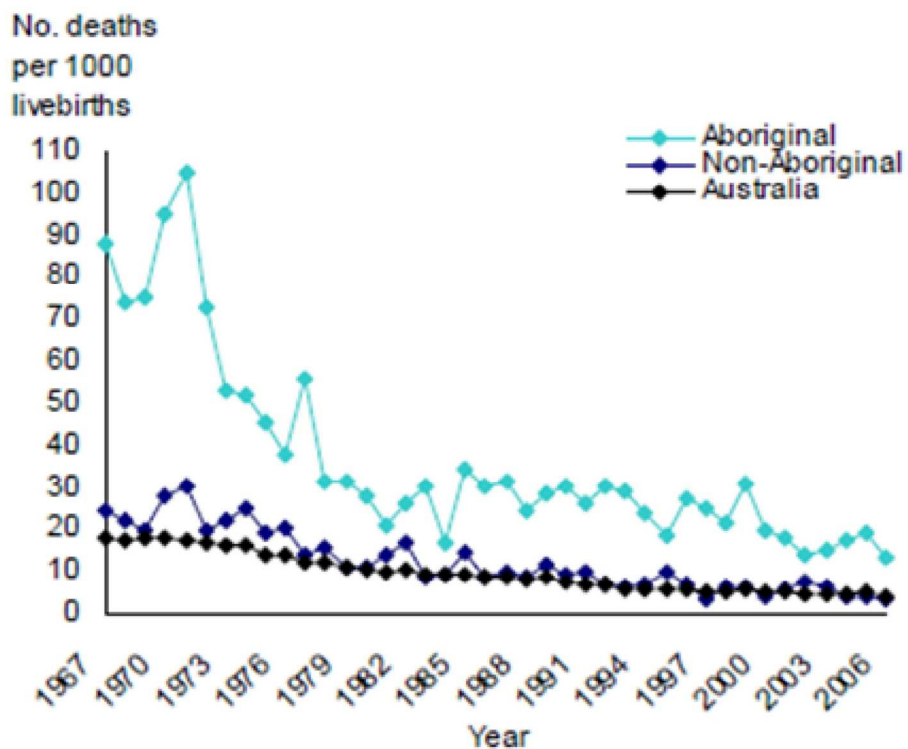

Figure 6. Infant mortality, Northern Territory and Australia, 1967-2007  
 Source: Northern Territory Department of Health, 2011.29

131x103mm (300 x 300 DPI)

Peer Review Only

1  
2  
3  
4  
5  
6  
7  
8  
9  
10  
11  
12  
13  
14  
15  
16  
17  
18  
19  
20  
21  
22  
23  
24  
25  
26  
27  
28  
29  
30  
31  
32  
33  
34  
35  
36  
37  
38  
39  
40  
41  
42  
43  
44  
45  
46  
47  
48  
49  
50  
51  
52  
53  
54  
55  
56  
57  
58  
59  
60

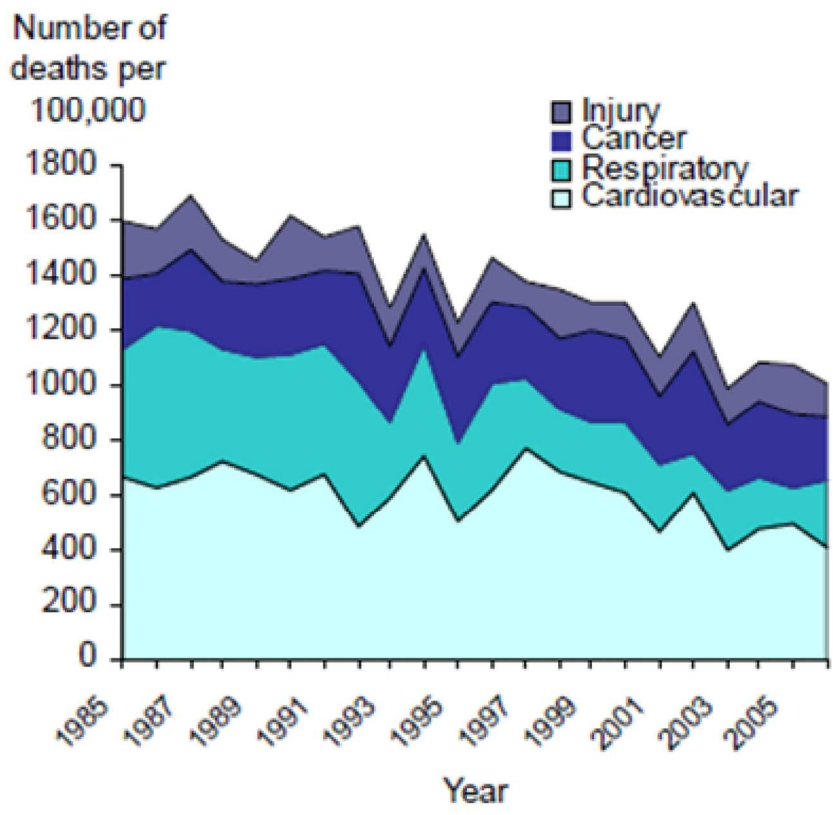

Figure 7. Leading causes of death in the Aboriginal population of the Northern Territory: 1985-2006  
 Source: Northern Territory Department of Health, 2011.29

137x112mm (300 x 300 DPI)

only

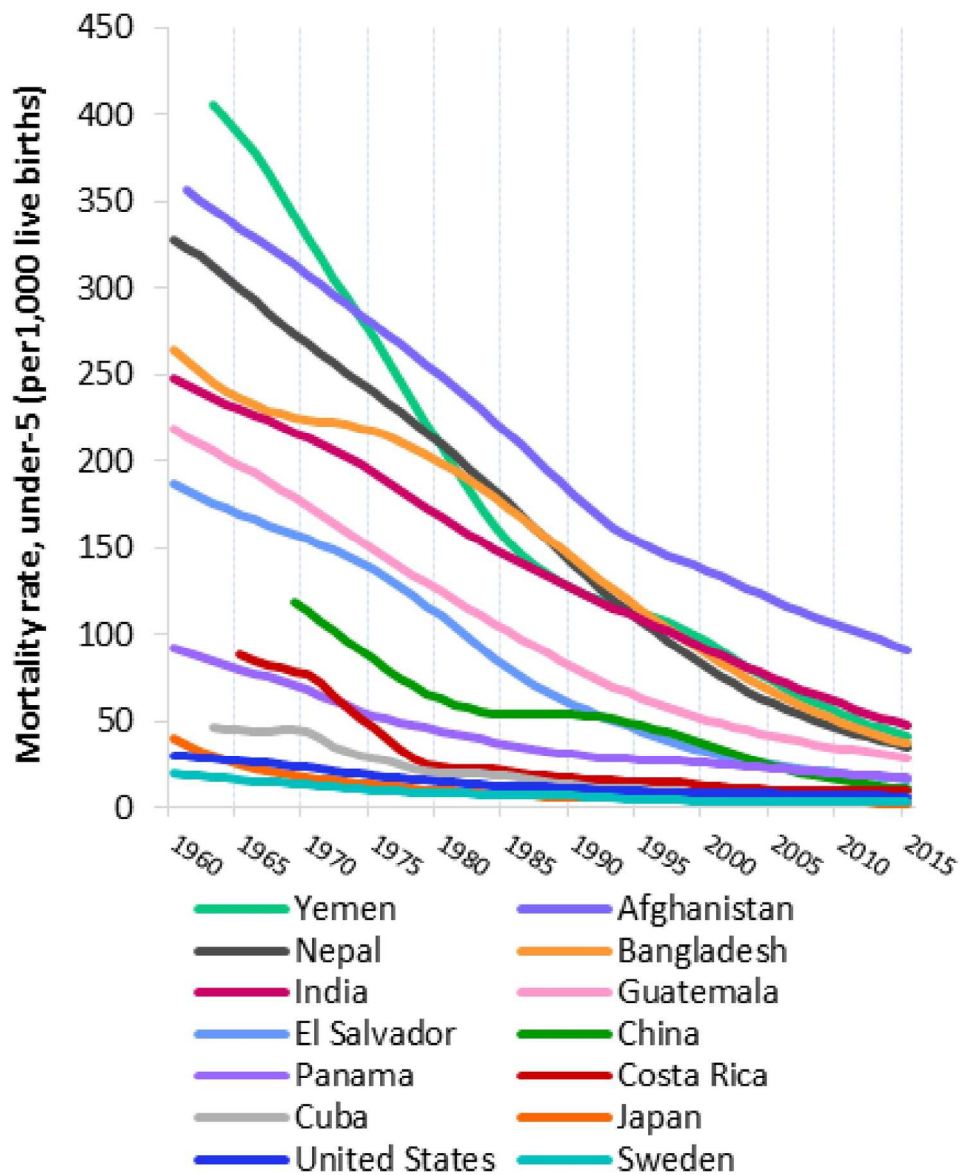

Figure 8. Under-five mortality rates for selected countries, 1960-2015  
 Source: adapted from UNICEF Global Database, 2015.<sup>31</sup>

189x223mm (300 x 300 DPI)



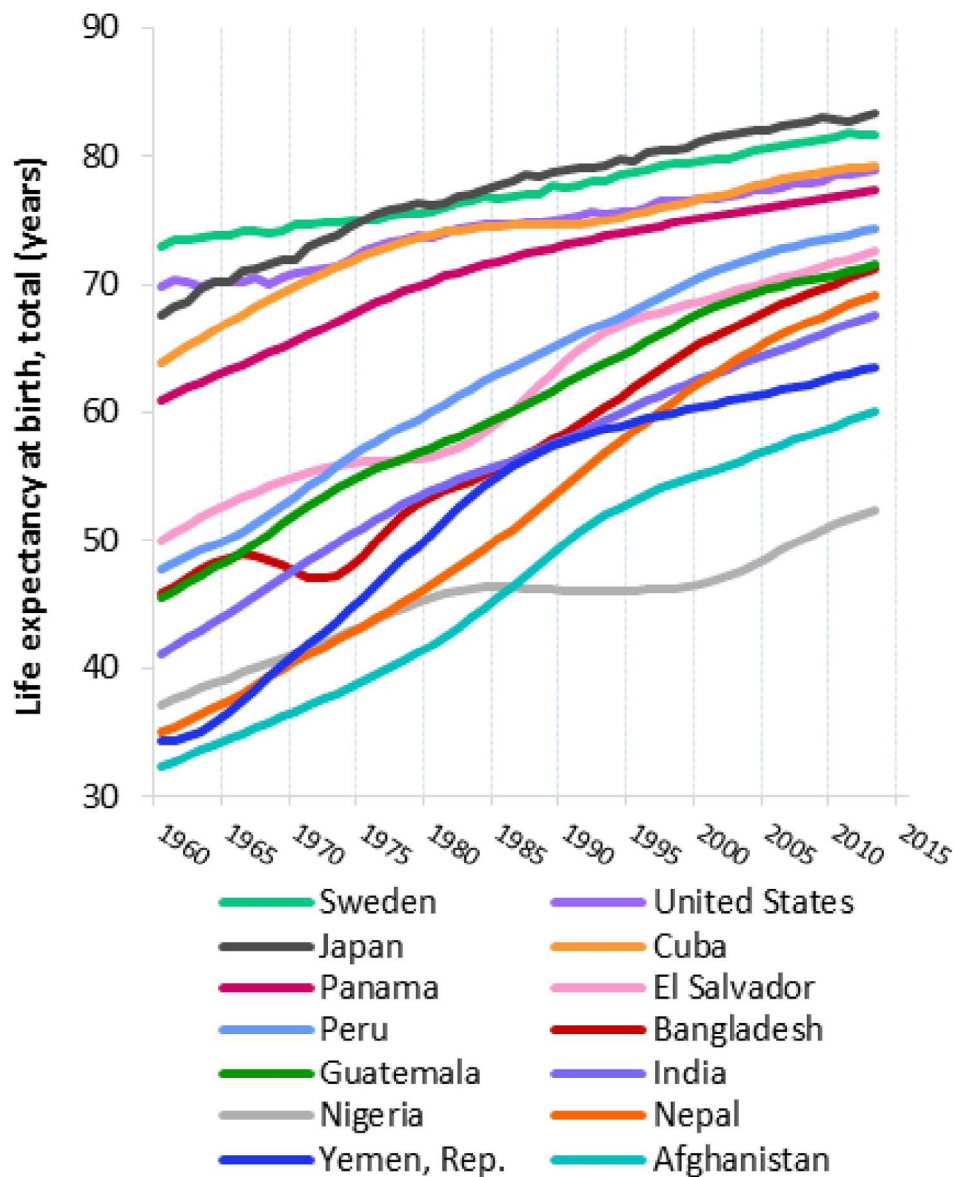

Figure 9. Life expectancy at birth for selected countries, 1960-2013

Source: adapted from The World Bank, 2016.<sup>32</sup>

Source notes: Derived from male and female life expectancy at birth from sources such as: United Nations Population Division; World Population Prospects; United Nations Statistical Division. Population and Vital Statistics Report (various years); Census reports and other statistical publications from national statistical offices; Eurostat: Demographic Statistics; Secretariat of the Pacific Community: Statistics and Demography Programme; and U.S. Census Bureau: International Database.

189x223mm (300 x 300 DPI)

**Note for figure 5A-D formatting**

– please enter the text given below in the top left of each graph for Figure 5 A-D:

**A. 1971**

**Total population: 1,221**

**B. 1986**

**Total population: 1,806**

**C. 1996**

**Total population: 2,023**

**D. 2011**

**Total population: 2,263**

## STROBE Statement—checklist of items that should be included in reports of observational studies

|                           | Item No | Recommendation                                                                                                                                                                                                                                                                                                                                                                                                                                                                                        | Page No.(s) [Paragraph No.(s)] |
|---------------------------|---------|-------------------------------------------------------------------------------------------------------------------------------------------------------------------------------------------------------------------------------------------------------------------------------------------------------------------------------------------------------------------------------------------------------------------------------------------------------------------------------------------------------|--------------------------------|
| <b>Title and abstract</b> | 1       | (a) Indicate the study's design with a commonly used term in the title or the abstract                                                                                                                                                                                                                                                                                                                                                                                                                | 1                              |
|                           |         | (b) Provide in the abstract an informative and balanced summary of what was done and what was found                                                                                                                                                                                                                                                                                                                                                                                                   | 2                              |
| <b>Introduction</b>       |         |                                                                                                                                                                                                                                                                                                                                                                                                                                                                                                       |                                |
| Background/rationale      | 2       | Explain the scientific background and rationale for the investigation being reported                                                                                                                                                                                                                                                                                                                                                                                                                  | 3[1-9]                         |
| Objectives                | 3       | State specific objectives, including any prespecified hypotheses                                                                                                                                                                                                                                                                                                                                                                                                                                      | 3[1]                           |
| <b>Methods</b>            |         |                                                                                                                                                                                                                                                                                                                                                                                                                                                                                                       |                                |
| Study design              | 4       | Present key elements of study design early in the paper                                                                                                                                                                                                                                                                                                                                                                                                                                               | 4[6]-5[5]                      |
| Setting                   | 5       | Describe the setting, locations, and relevant dates, including periods of recruitment, exposure, follow-up, and data collection                                                                                                                                                                                                                                                                                                                                                                       | 4[6]-5[5]                      |
| Participants              | 6       | (a) <i>Cohort study</i> —Give the eligibility criteria, and the sources and methods of selection of participants. Describe methods of follow-up<br><i>Case-control study</i> —Give the eligibility criteria, and the sources and methods of case ascertainment and control selection. Give the rationale for the choice of cases and controls<br><i>Cross-sectional study</i> —Give the eligibility criteria, and the sources and methods of selection of participants                                | 4[4] 5[5]                      |
|                           |         | (b) <i>Cohort study</i> —For matched studies, give matching criteria and number of exposed and unexposed<br><i>Case-control study</i> —For matched studies, give matching criteria and the number of controls per case                                                                                                                                                                                                                                                                                | -                              |
| Variables                 | 7       | Clearly define all outcomes, exposures, predictors, potential confounders, and effect modifiers. Give diagnostic criteria, if applicable                                                                                                                                                                                                                                                                                                                                                              | 4[5]-5[4]                      |
| Data sources/measurement  | 8*      | For each variable of interest, give sources of data and details of methods of assessment (measurement). Describe comparability of assessment methods if there is more than one group                                                                                                                                                                                                                                                                                                                  | 4[5]-5[4]                      |
| Bias                      | 9       | Describe any efforts to address potential sources of bias                                                                                                                                                                                                                                                                                                                                                                                                                                             | 5[1-3] 7[3-4] 8[1,3]           |
| Study size                | 10      | Explain how the study size was arrived at                                                                                                                                                                                                                                                                                                                                                                                                                                                             | 4[5]-5[3]                      |
| Quantitative variables    | 11      | Explain how quantitative variables were handled in the analyses. If applicable, describe which groupings were chosen and why                                                                                                                                                                                                                                                                                                                                                                          | 4[5]-5[4]                      |
| Statistical methods       | 12      | (a) Describe all statistical methods, including those used to control for confounding                                                                                                                                                                                                                                                                                                                                                                                                                 | 5[3]                           |
|                           |         | (b) Describe any methods used to examine subgroups and interactions                                                                                                                                                                                                                                                                                                                                                                                                                                   | 5[4]                           |
|                           |         | (c) Explain how missing data were addressed<br><br>We believe that the ascertainment of deaths overall is as good as it can be. We have accessed the original sources for this information (4[5]). There are no published government estimates prior to 1985. From 1985, our ascertainment compares favourably with that of government agencies (8[3]). Subjects included are those with available death data, plus age at death or age-group and natural or unnatural cause of death classification. |                                |

As a more detailed description of the cause of death was not consistently documented until after 1985 we restricted analyses by cause of death to 1985-2010. Additionally, as census data also became available from that time, death rates were calculated in the same time period.

(d) *Cohort study*—If applicable, explain how loss to follow-up was addressed

*Case-control study*—If applicable, explain how matching of cases and controls was addressed

*Cross-sectional study*—If applicable, describe analytical methods taking account of sampling strategy

(e) Describe any sensitivity analyses

Continued on next page

| Results           |     | Page No.(s)<br>[Paragraph<br>No.(s)]                                                                                                                                                                                                                                                                                                                                                                          |                         |
|-------------------|-----|---------------------------------------------------------------------------------------------------------------------------------------------------------------------------------------------------------------------------------------------------------------------------------------------------------------------------------------------------------------------------------------------------------------|-------------------------|
| Participants      | 13* | (a) Report numbers of individuals at each stage of study—eg numbers potentially eligible, examined for eligibility, confirmed eligible, included in the study, completing follow-up, and analysed<br>(b) Give reasons for non-participation at each stage<br>(c) Consider use of a flow diagram                                                                                                               | 6[1-2]                  |
| Descriptive data  | 14* | (a) Give characteristics of study participants (eg demographic, clinical, social) and information on exposures and potential confounders<br>(b) Indicate number of participants with missing data for each variable of interest<br>(c) <i>Cohort study</i> —Summarise follow-up time (eg, average and total amount)                                                                                           | 6[1-5]<br>Figures 1 & 2 |
| Outcome data      | 15* | <i>Cohort study</i> —Report numbers of outcome events or summary measures over time<br><i>Case-control study</i> —Report numbers in each exposure category, or summary measures of exposure<br><i>Cross-sectional study</i> —Report numbers of outcome events or summary measures                                                                                                                             |                         |
| Main results      | 16  | (a) Give unadjusted estimates and, if applicable, confounder-adjusted estimates and their precision (eg, 95% confidence interval). Make clear which confounders were adjusted for and why they were included<br>(b) Report category boundaries when continuous variables were categorized<br>(c) If relevant, consider translating estimates of relative risk into absolute risk for a meaningful time period |                         |
| Other analyses    | 17  | Report other analyses done—eg analyses of subgroups and interactions, and sensitivity analyses                                                                                                                                                                                                                                                                                                                |                         |
| <b>Discussion</b> |     |                                                                                                                                                                                                                                                                                                                                                                                                               |                         |
| Key results       | 18  | Summarise key results with reference to study objectives                                                                                                                                                                                                                                                                                                                                                      | 7[3]-8[2]               |
| Limitations       | 19  | Discuss limitations of the study, taking into account sources of potential bias or imprecision. Discuss both direction and magnitude of any potential bias                                                                                                                                                                                                                                                    | 8[3]                    |
| Interpretation    | 20  | Give a cautious overall interpretation of results considering objectives, limitations, multiplicity of analyses, results from similar studies, and other relevant evidence                                                                                                                                                                                                                                    | 8[4]-9[3]               |

1  
2  
3  
4  
5  
6  
7  
8  
9  
10  
11  
12  
13  
14  
15  
16  
17  
18  
19  
20  
21  
22  
23  
24  
25  
26  
27  
28  
29  
30  
31  
32  
33  
34  
35  
36  
37  
38  
39  
40  
41  
42  
43  
44  
45  
46  
47  
48  
49  
50  
51  
52  
53  
54  
55  
56  
57  
58  
59  
60

|                  |    |                                                                       |      |
|------------------|----|-----------------------------------------------------------------------|------|
| Generalisability | 21 | Discuss the generalisability (external validity) of the study results | 9[1] |
|------------------|----|-----------------------------------------------------------------------|------|

---

**Other information**

---

|         |    |                                                                                                                                                               |       |
|---------|----|---------------------------------------------------------------------------------------------------------------------------------------------------------------|-------|
| Funding | 22 | Give the source of funding and the role of the funders for the present study and, if applicable, for the original study on which the present article is based | 11[3] |
|---------|----|---------------------------------------------------------------------------------------------------------------------------------------------------------------|-------|

\*Give information separately for cases and controls in case-control studies and, if applicable, for exposed and unexposed groups in cohort and cross-sectional studies.

**Note:** An Explanation and Elaboration article discusses each checklist item and gives methodological background and published examples of transparent reporting. The STROBE checklist is best used in conjunction with this article (freely available on the Web sites of PLoS Medicine at <http://www.plosmedicine.org/>, Annals of Internal Medicine at <http://www.annals.org/>, and Epidemiology at <http://www.epidem.com/>). Information on the STROBE Initiative is available at [www.strobe-statement.org](http://www.strobe-statement.org).

# BMJ Open

## Transformation of mortality in a remote Australian Aboriginal community: a retrospective observational study

|                                 |                                                                                                                                                                                                                                                                                                                                                    |
|---------------------------------|----------------------------------------------------------------------------------------------------------------------------------------------------------------------------------------------------------------------------------------------------------------------------------------------------------------------------------------------------|
| Journal:                        | <i>BMJ Open</i>                                                                                                                                                                                                                                                                                                                                    |
| Manuscript ID                   | bmjopen-2017-016094.R1                                                                                                                                                                                                                                                                                                                             |
| Article Type:                   | Research                                                                                                                                                                                                                                                                                                                                           |
| Date Submitted by the Author:   | 01-Jun-2017                                                                                                                                                                                                                                                                                                                                        |
| Complete List of Authors:       | Hoy, Wendy; The University of Queensland, Centre for Chronic Disease, UQCCR, Faculty of Medicine<br>Mott, Susan; The University of Queensland, Centre for Chronic Disease, UQCCR, Faculty of Medicine<br>McLeod, Beverly ; The University of Queensland, Centre for Chronic Disease, UQCCR, Faculty of Medicine; Menzies School of Health Research |
| <b>Primary Subject Heading</b>: | Epidemiology                                                                                                                                                                                                                                                                                                                                       |
| Secondary Subject Heading:      | Public health                                                                                                                                                                                                                                                                                                                                      |
| Keywords:                       | Australian Aboriginal, Mortality transition, Demographic profile, Remote-living, Chronic disease                                                                                                                                                                                                                                                   |
|                                 |                                                                                                                                                                                                                                                                                                                                                    |

SCHOLARONE™  
Manuscripts

1  
2  
3 **Transformation of mortality in a remote Australian Aboriginal community: a retrospective**  
4  
5 **observational study**  
6

7  
8 **Hoy WE**

9  
10 *Corresponding author,*

11  
12 The University of Queensland,

13  
14 Director of the CKD.CRE and the Centre for Chronic Disease and Professor of Medicine

15  
16 Centre for Chronic Disease, Faculty of Medicine, The University of Queensland, Health  
17 Sciences Building, Level 8, Royal Brisbane & Women's Hospital , Herston, Queensland 4029,  
18 Australia. w.hoy@uq.edu.au, +61 7 3346 4809;  
19

20  
21 **Mott SA**

22  
23 The University of Queensland,

24  
25 Senior Research Officer,

26  
27 Centre for Chronic Disease, Faculty of Medicine, The University of Queensland, Health  
28 Sciences Building, Level 8, Royal Brisbane & Women's Hospital , Herston, Queensland 4029,  
29 Australia;  
30  
31

32  
33 **McLeod BJ**

34  
35 Retired,

36  
37 Centre for Chronic Disease, Faculty of Medicine, The University of Queensland, Health  
38 Sciences Building, Level 8, Royal Brisbane & Women's Hospital , Herston, Queensland 4029,  
39 Australia; and Menzies School of Health Research, Royal Darwin Hospital Campus, PO Box  
40 41096, Casuarina NT 0811.  
41  
42  
43  
44  
45  
46  
47  
48  
49  
50  
51  
52  
53  
54  
55  
56  
57  
58  
59  
60

## Abstract

**Objectives** To describe trends in ages and causes of deaths in a remote-living Australian Aboriginal group over a recent 50 year period.

**Design** A retrospective observational study, from 1960 to 2010, of deaths and people starting dialysis, using data from local clinic, parish, dialysis and birthweight registers.

**Setting** A remote island community in the Top End of Australia's Northern Territory, where a Catholic Mission was established in 1911. The estimated Aboriginal population was about 800 in 1960 and 2,260 in 2011.

**Participants** All Aboriginal residents of this community whose deaths had been recorded.

**Outcome measures** Annual frequencies and rates of terminal events (deaths and dialysis starts) by age-group and cause of death.

**Results** In all, and against a background of high rates of low birthweight, 223 deaths in infants and children and 934 deaths in adults (age  $\geq 15$  years) were recorded; 88% were of natural causes. Most deaths in the 1960s were in infants and children. However, these fell dramatically, across the birthweight spectrum, while adult deaths progressively increased. The leading causes of adult natural deaths were chronic lung disease, cardiovascular disease and, more recently, renal failure, and rates were increased two-fold in those of low birthweight. However, rates of natural adult deaths have been falling briskly since 1986, most markedly among people of age 45+ years. The population is increasing and its age structure is maturing.

**Conclusions** The changes in death profiles, the expression of the Barker hypothesis and the ongoing increases in adult life expectancy, reflect epidemiologic and health transitions of astonishing rapidity. These probably flow from advances in public health policy and health care delivery, as well as improved inter-sectoral services, which are all to be celebrated. Other remote communities in Australia are experiencing the same phenomena, and similar events are well advanced in many developing countries.

## Strengths and limitations of this study

- The broad sweep and historical depth of this study, the unique data sources and the integration of clinical and demographic information have allowed delineation of the profound and recent transformation of mortality not previously appreciated in the Australian Aboriginal setting.
- It is inevitable that we have failed to capture some deaths in the past, which probably resulted in understatement of the magnitude of this transition. In some recorded natural deaths the assignments were approximate and the contribution of multiple causes was underestimated.



## Aims and objectives

To describe trends in mortality over more than fifty years in a remote Aboriginal community in the Northern Territory (NT) of Australia.

## Background

Recent literature describes a rapid shift in patterns and causes of death in most countries and regions. Infant and childhood deaths have decreased, life expectancy has increased,<sup>1</sup> and more deaths in adults are associated with non-communicable chronic diseases.<sup>2</sup> Here we describe such a transition in a remote-living Aboriginal Australian group over the last 51 years.

The Tiwi people live in three major communities (and several smaller ones) on Bathurst and Melville Islands off the coast of the Northern Territory, about 90 km by sea from Darwin (Figure 1). They lived in relative isolation for perhaps 7,000 to 15,000 years, and consider themselves distinct from mainland Aboriginal people, with their own unique origins, language, and customs.<sup>3</sup>

In 1911, a Catholic mission was established by the Missionaries of the Sacred Heart (MSC), led by Father Francis Xavier Gsell.<sup>4</sup> Changes followed in lifestyle (from nomadic hunter gatherers to living in fixed dwellings), in diet (from food from the bush and sea to depot supplies of less perishable, high caloric density food, of flour, fat, meat and sugar), in family and community structures (from polygamy and networks of carers within extended families to monogamy), and in the establishment of dormitories, schools and clinics. Transition has been especially accelerated since World War 2. Cigarettes were widely introduced around this time (anecdotal evidence). The 1967 referendum formally recognised Aboriginal people in Australia<sup>5</sup> and they were thenceforth included as residents in the national census. Legal access to alcohol began around that time. The first social club, serving alcohol, was opened in the largest Tiwi community in 1967.

Some early insights into remote-living Aboriginal people in the NT are provided by Ellen Kettle, the first Rural Survey Sister in the NT, who pioneered mobile health work in isolated areas and established health records for individuals, and by Dr John Hargrave, the first Aboriginal Health Officer, who personally examined members of many communities in 1957/1958. Both advanced understanding of Aboriginal health and development of services and policy. They described endemic conditions (yaws, malaria, infestations, trachoma), imported conditions like leprosy, syphilis (arguably), tuberculosis, measles, small pox and influenza. They documented florid malnutrition and frank starvation, high infant and maternal mortality and conspicuously low birthweight. They then described, over time, dramatic reductions in infant mortality, the appearance of alcohol related disorders, and of occasional overweight and obesity, as well as the emergence of non-communicable chronic diseases.<sup>6,7</sup>

1  
2  
3 These phenomena occurred against a background of continuous improvements in remote  
4 Aboriginal health services, including management of infections and infestations,  
5 immunisations, better obstetric services, better maternal and child care, and cancer  
6 surveillance. Chronic non-communicable diseases, predominantly type 2 diabetes,  
7 cardiovascular disease, chronic lung disease and chronic kidney disease now dominate the  
8 adult health profile and are the focus of most of health service provision for remote-living  
9 Australian Aboriginal adults.<sup>8</sup>

10  
11  
12  
13 Clinical services were established by the mission, starting as first aid facilities on the beach  
14 at Nguuiu (now Wurrumiyanga) on Bathurst Island. These eventually evolved into a clinic and  
15 local hospital, run by the Sisters of the Order of Our Lady of Sacred Heart (OLSH), with  
16 additional clinics in the Melville Island communities of Milikapiti and Pirlangimpi. Medical  
17 records were established for individuals, along with clinic-based registers for births and  
18 deaths. Doctors from Darwin eventually provided backup support. More recently, there  
19 have been resident doctors for intermittent periods. Local hospital beds were closed in the  
20 early 1990s, and all persons needing hospital admission were thenceforth streamed to the  
21 Royal Darwin Hospital, transported by small plane. Responsibility for clinical services was  
22 transferred from the mission to the NT government in the early/mid-1990s.

23  
24  
25  
26  
27  
28 Anthropologist Charles Hart enumerated a Tiwi population of 1,062 in 1928.<sup>3</sup> Dr John  
29 Hargrave estimated the Tiwi population at about 800 to 900 in 1957, compatible with a  
30 1954 Commonwealth Government estimate of 920.<sup>9,10</sup> Regular government census  
31 estimates have been published every five years since 1986.

32  
33  
34 Traditionally, Tiwi people have only occasionally transmigrated, usually for purposes of  
35 intermarriage according to tribal edicts. The destinations of people who travel, and the  
36 movements and locations of community members, are known by all. Deaths of people who  
37 die out of community (usually in Darwin or while visiting other communities) are  
38 documented in their medical records on in their “home” community clinic and added to the  
39 death register.

40  
41  
42  
43 Death rates in the Tiwi community, along with those in Aboriginal people in Arnhem Land,  
44 have among been the highest in Australia: in the 1990s, with age-standardisation, they were  
45 six times those of the Australian mainstream.<sup>11</sup> This generally reflects the much younger age  
46 of Tiwi people at death. Cases of kidney failure began to attract attention in the 1980s;<sup>12</sup> for  
47 several decades Tiwi people had the highest rates of renal failure yet described, and the first  
48 hemodialysis unit in a remote Aboriginal location was established in Wurrumiyanga on  
49 Bathurst Island in the late 1990s. High renal failure rates have followed in other remote  
50 communities. The characteristics and speculative causes of the renal disease have been  
51 described extensively.<sup>12,13,14</sup> We have previously described the high rates of low  
52 birthweight in this community and the risk exacerbations for natural deaths in infants,  
53 children and young adults associated with low birthweight.<sup>15,16</sup>

## Methods

Data sources were the written logs of deaths maintained by the clinics, dialysis unit records of NT Renal Services, and in this staunchly Catholic community, records maintained by the parish priests of all funerals and burials. We report recorded deaths over the 51 year period from 1960 to 2010, beginning when clinic recording of details of death (age, date and explanation) was becoming more systematic.

Starting in the 1980s, maintenance dialysis has been available to Tiwi persons with end-stage renal disease; numbers of patients starting treatment increased steadily until apparently stabilising at about 6 persons a year in the early 2000s. In this study, initiation of dialysis is considered a natural (renal) death, occurring when dialysis began, because without that treatment all participants would have died shortly thereafter. There was no additional assignment of date or cause of death when they finally expired.

Description of cause of death became more detailed over time. In the early years the only discrimination for some deaths was of natural versus unnatural causes, while, in later years, there was more detailed narrative on cause(s) and associations of death. In the early years, deaths in people over 60 years of age often received a causal assignment of “old age” or “debility”, but with time “disease or organ-specific” assignments increased for them as well. In some recorded natural deaths the assignments were approximate and the contribution of multiple causes was underestimated. Cause of death was assigned by clinic directors and always took into account the previous health profile of each deceased person. In the context of sometimes sparse clinical detail, and conforming to the methodology for the Global Burden of Disease study, we derived and assigned a principal cause of death only.

Unnatural deaths, or deaths of misadventure, included those due to vehicular accidents, drownings, fire (burns and smoke inhalation), homicide, suicide, poisonings, jelly fish stings, crocodile and shark attacks etc. We defined the main categories of natural deaths as cardiovascular (heart attack, congestive heart failure, ischemic heart disease, coronary artery disease and stroke), respiratory (chronic lung disease, chronic obstructive airways disease, chronic bronchitis, bronchiectasis, pneumonia), renal (death with terminal renal failure, and also, after 1985, institution of dialysis in people with terminal renal failure), various other causes (eg sepsis, liver failure, lupus, cancer etc.), and debility or old age. When there was uncertainty about deaths or persons, data were checked with several senior community members, who had lived through much of the study interval and had known most community members.

Analyses were conducted using Stata 14 (StataCorp. 2015. *Stata Statistical Software: Release 14*. College Station, TX: StataCorp LP). Numbers and rates of deaths were calculated by age-group and cause of death. Five-year moving averages were created using the `tssmooth` package. Mortality rates, per 100,000 population, could be calculated only since 1986, the first year of the subsequent quinquennial national census that specifically

1  
2  
3 enumerated Aboriginal Tiwi people. Total population estimates were also taken from census  
4 figures.<sup>17</sup>  
5  
6

## 7 Results

8  
9 1,190 deaths were recorded, and age was documented or age group could be inferred in  
10 1,156 (97.1%) of these (for 452 or 95.0% of deaths in the first two decades, and 704 or  
11 98.6% of deaths in the last three decades).  
12

13  
14 Of these 1,156 deaths, 222 (19.2 %) were in infants and children (<1 years and 1 to <15  
15 years respectively), and 934 (78.5%) were deaths of adults (at ages  $\geq 15$  years). Twenty-five  
16 (11.3%) deaths of infants and children were deaths of misadventure and 197 (88.7%) were  
17 of natural causes. Among adults, 114 (12.2%) of deaths were due to misadventure and 820  
18 (87.8%) were natural deaths.  
19

20  
21 Figure 2 shows deaths by age-group and interval (frequencies are tabulated in  
22 Supplementary Table 1). Early on, most deaths were in infants and children. These fell  
23 rapidly at first, then more slowly. The main categories of death in infants and children were  
24 diarrhoea, respiratory disease and failure to thrive, with some cases of sudden infant death,  
25 and a few congenital abnormalities.<sup>15</sup> In 1973, a house fire killed six siblings, making a major  
26 contribution to deaths due misadventure in this group.  
27  
28

29  
30 As infant and childhood deaths fell, numbers of deaths of adults increased. Many of these  
31 have been among young adults (ages 15 to <45 years) with high numbers of both natural  
32 death and deaths of misadventure. The latter include motor vehicle accidents, drownings,  
33 homicide, and suicide; there were 50 suicides (50% of deaths of misadventure) between  
34 1985 and 2010, of which 47 (94%) were among males.  
35  
36

37  
38 Since 1975 most deaths are in people of  $\geq 45$  years, and most of these are of natural causes.  
39 The numbers have not perceptibly increased since the early 1990s. Only 13 (2.5%) of these  
40 older adult deaths were due to misadventure.  
41

42  
43 Figure 3 shows the trends in natural deaths in adults over time, by primary causal  
44 assignment. Numbers peaked in the later 1980s but have since had an indeterminate or  
45 falling trend. Through the mid-1980s there were substantial numbers of natural deaths with  
46 no further details and deaths with assignments of "old age" or debility", but there have  
47 been more "organ-system" assignments since the early 1990s. Among specific assignments,  
48 cardiovascular deaths, and cancer/liver/other deaths were represented over the continuum,  
49 while pulmonary (respiratory) deaths became prominent but more recently have been  
50 decreasing. Renal deaths become prominent in the 1980s; there were 25 renal deaths in the  
51 1980s, 42 in the 1990s and 52 from 2000 to 2009, constituting 14.7, 24.1 and 31.7% of all  
52 natural deaths in those intervals.  
53  
54  
55  
56  
57  
58  
59  
60

1  
2  
3 Figures 4 A-C show the smoothed estimated rates of natural deaths by age-group since  
4 1986.<sup>17</sup> Rates of death in infants and children have fallen remarkably (4A). There was an  
5 early increase in death rates among young adults (4A), followed by a progressive decline  
6 since the mid-1990s. Death rates of people age  $\geq 45$  years have markedly declined, at least  
7 until the last few years of the observation interval (4B). The net effect of all these changes  
8 is a decrease overall death rates of the entire population.  
9

10  
11 These trends are further summarised in Table 1, which shows the rates of natural deaths by  
12 age-group in the first and last 5-year blocks of the observation interval. Death rates of  
13 infants and children fell by 88.9 %, those of young adults fell by 23.5%, while of people age  
14  $\geq 45$  years fell by 65.1%. For the population as a whole, rates of natural death fell by 51.6 %.  
15  
16

17  
18 Figures 5 A-D show that the population age structure has changed over <40 years to include  
19 higher numbers and proportions of young and middle age adults.<sup>17,18</sup> In addition, the size of  
20 the total population has increased by 85%.  
21  
22

## 23 Discussion

24  
25 This is the most complete description of deaths in any indigenous Australian community. It  
26 shows a profound change in patterns, rates and causes of death over a 51 year interval.  
27 Infant and childhood deaths have fallen dramatically; now most people die as adults ( $\geq 15$   
28 years), and of natural causes. Furthermore, in the last 25 years, rates of natural deaths of  
29 adults have been falling. The population is increasing and is progressively ageing.  
30  
31

32  
33 With continued improvements in prevention and treatment of infectious diseases, adult  
34 deaths are increasingly due to non-communicable diseases, with chronic lung disease,  
35 cardiovascular disease and renal disease making the greatest contribution. These chronic  
36 diseases have usually overlapped and been co-contributors to death, although this is  
37 obscured by our use of mutually exclusive categories of primary cause of adult death.  
38 Among specific assignments, cardiovascular deaths, and cancer/liver/other deaths etc. have  
39 been represented over several decades, while pulmonary deaths became prominent in the  
40 1970s, but have decreased since the early 1990s. Kidney failure has become prominent  
41 since the 1980s, and is now the single leading assignment.  
42  
43  
44

45  
46 The still excessive (although improving) rates of natural deaths are compatible with the  
47 "Barker hypothesis", which proposes that survivors of lower birthweights have accentuated  
48 susceptibility to chronic diseases and premature natural death in adult life.<sup>15,16,19</sup> We have  
49 shown that the dramatic reductions in early life mortality have been experienced across the  
50 birthweight spectrum, so that, against a background of seriously low birthweights, large  
51 cohorts of underweight infants, who were previously at greatest risk for early death, have  
52 now survived to adult life. As adults, they have enhanced susceptibility to chronic disease, as  
53 the hypothesis proposes and as we have demonstrated.<sup>15,20,21</sup> Through 2010, rates of  
54 natural adult deaths before the age of 41, in Tiwi people of low birthweight, were twice that  
55  
56  
57  
58  
59  
60

1  
2  
3 of those with higher birthweights, with the greatest accentuation of risk being for  
4 pulmonary deaths, a 6-fold increase.<sup>16</sup>  
5

6  
7 The continued evolution of the chronic disease rates and patterns and rates over time is  
8 probably influenced by improving birthweights, changing age structure among adults,  
9 improved prevention, screening and management of chronic disease and changes in  
10 competing causes of deaths. With reductions in deaths from pulmonary disease and  
11 postponement of cardiovascular deaths, flowing from a secular increase in birthweights,<sup>13</sup>  
12 and from better medical management, coexisting nephropathy has more opportunity to  
13 pursue its more leisurely course to renal failure.<sup>22</sup> We have published extensively on the  
14 expression, course and biopsy representation of the underlying renal disease.<sup>12</sup> It is clearly  
15 multideterminant with risk enhanced by low birthweights, inflammation and infection,  
16 episodes of post-streptococcal glomerulo nephritis and higher BMIs and diabetes in adult  
17 life.<sup>23,24</sup>  
18  
19  
20  
21

22 Availability and use of the clinic-based death records and the supporting parish burial  
23 records sets this study apart. The NT-wide government register of deaths dates only back to  
24 the mid-1980s, and in that register, community assignment has sometimes been  
25 incomplete. Moreover, government records do not capture the full burden of renal failure,  
26 due to deficient documentation of a renal cause of death, both in people receiving renal  
27 replacement therapy (RRT), and in those dying of renal failure without receiving RRT.<sup>14,25</sup>  
28 Our composite definition of “renal deaths” as the start of RRT and a renal death without RRT  
29 more fully reveals the burden of renal failure disease. That approach is necessary for  
30 monitoring, prevention and intervention strategies, especially in the context of the burden  
31 and costs of RRT.<sup>13,26</sup> Furthermore, it is the only way that kidney failure rates can be  
32 compared with populations in other countries for whom RRT is not widely available.  
33  
34  
35  
36  
37

38 Our data also reveal an excess of deaths by misadventure in young adults in more recent  
39 years. Such deaths, often alcohol or drug-fuelled, are prominent among young Aboriginal  
40 adults nationwide, and are of grave concern.<sup>27,28</sup>  
41  
42

43 Limitations include the fact that some Tiwi deaths were probably not captured in our data  
44 sources. This is more likely in the earlier years, so that that the earlier numbers and rates of  
45 deaths, as well as the subsequent fall in deaths, have probably been understated.  
46 Moreover, from 1985 to 2009, the government agencies recorded 18% fewer deaths for the  
47 Tiwi community than we have recorded, with under-identification varying from 10 to 30%  
48 over five consecutive 5 years intervals (In an email from Y Zhao, ([yuejen.zhao@nt.gov.au](mailto:yuejen.zhao@nt.gov.au))  
49 2016 Oct 24). An additional limitation is assignment of a single category of cause of death,  
50 whereas natural deaths in adults have multiple causes and associated conditions; the  
51 coexistence of cardiovascular risk and lung disease, and of renal disease with cardiovascular  
52 disease are well recognised. However, the use of a single underlying cause of death is  
53 dictated by the detail of the source data. It is also the approach employed until recently for  
54 the mortality component of the study of Global Burden of Disease.  
55  
56  
57  
58  
59  
60

1  
2  
3  
4 Is it credible that about half the deaths in Tiwi people in the 1960s were in subjects less than  
5 15 years of age? The World Health Organization estimated that, in 1955, fully 40% of global  
6 deaths were in children age <5 years, so presumably an even greater proportion were  
7 deaths of people <15 year old).<sup>29</sup> Furthermore, analyses of skeletal remains of some  
8 premodern cultures have suggested that up to 68% of deaths occurred people <15 years old  
9 (Chamberlain cited in Roser, 2006).<sup>1,30</sup> Hart's comment that, around 1928, five of 15  
10 bestowed wives (females promised in marriage to specific Tiwi community members), died  
11 before puberty, supports a high childhood mortality.<sup>3</sup>

12  
13  
14  
15  
16 Other Aboriginal groups in remote areas of Australia over the same intervals have  
17 undoubtedly experienced similar transitions. NT government agencies have described  
18 similar trends in early life mortality since 1967, and improvements in natural death rates  
19 overall since the late 1980s (Figures 6 and 7).<sup>31</sup> In the Shire of Broome, Western Australia,  
20 Gracey et al. described excessive levels of Aboriginal infant and childhood infection and  
21 under-nutrition in the 1970s and 1980s and increasing deaths by misadventure in young  
22 Aboriginal adults between 1971 and 1994.<sup>32</sup> Our findings are also consistent with events in  
23 many other countries and regions. Figure 8 shows the fall in early life mortality since 1960,  
24 which is most dramatic in disadvantaged populations like Yemen, Afghanistan, Bangladesh  
25 and Nepal,<sup>33</sup> while Figure 9 shows the simultaneous increase in life expectancy at birth,  
26 again most marked in disadvantaged settings.<sup>34</sup> Our Tiwi data show that the improvement in  
27 life expectancy is a function of reduced early life mortality as well as increasing adult  
28 longevity.

29  
30  
31  
32  
33  
34  
35 These changes represent triumphs of inter-sectoral improvements, public health policy and  
36 health care more broadly, which are to be celebrated. This is especially welcome news for  
37 the Tiwi Aboriginal people, whose mortality rates have been the worst in Australia,<sup>11</sup> and for  
38 remote-living Aboriginal people more broadly. It is also comforting for health care providers  
39 and policy makers to see such large scale progress demonstrated through an historical  
40 perspective, and should support resolve to stay the course in ongoing improvements.<sup>8</sup> More  
41 broadly, this information should moderate the negative discourse which has pervaded the  
42 Aboriginal health literature.

43  
44  
45  
46  
47 Encouraging as these trends are, further improvement in adult death rates can still be  
48 anticipated. Birthweights continue to improve, so that accentuated chronic disease risk from  
49 that source should decline; adult health services continue to improve, especially in  
50 prevention, screening and management of chronic disease,<sup>8</sup> and rates of smoking are  
51 falling.<sup>35</sup> Continuing challenges, however, include high rates of obesity,<sup>36</sup> poor diet,  
52 especially sugar excess,<sup>37</sup> drug use, alcohol abuse, and foetal alcohol syndrome.<sup>7</sup>  
53  
54  
55  
56  
57  
58  
59  
60 Interpersonal violence, especially high rates of suicide and accidents, remain serious  
challenges. Efforts to improve education, skills training, employment opportunities,  
empowerment and socioeconomic status must be unflagging and be robustly supported.

1  
2  
3 Acknowledgements: We are very grateful to Tiwi Land Council and the Tiwi people for their  
4 continuing support of this research. We specifically acknowledge the expertise and  
5 dedication of the sisters of the order of Our Lady of the Sacred Heart (OLSH) who  
6 maintained fastidious clinical records which now underlie much of this report. We are  
7 grateful to the clinic staff in the communities of Wurrumiyanga (previously known as Ngiuu)  
8 on Bathurst Island, and of Milikapiti and Pirlangimpi on Melville Island. We thank the  
9 Catholic Diocese of Darwin for allowing access to the medical records, and supplying records  
10 of deaths and burial recorded by the parish. We thank NT Renal Services for supplying  
11 records of Tiwi people who started dialysis. We thank Centre of Chronic Disease staff for  
12 their contribution to data management and analyses throughout the course of this and  
13 related projects.  
14  
15  
16  
17  
18  
19  
20  
21  
22  
23  
24  
25  
26  
27  
28  
29  
30  
31  
32  
33  
34  
35  
36  
37  
38  
39  
40  
41  
42  
43  
44  
45  
46  
47  
48  
49  
50  
51  
52  
53  
54  
55  
56  
57  
58  
59  
60



## References

1. Roser M. Population: Life Expectancy. Child Mortality. [cited 2016 Aug 18]. Available from: <http://ourworldindata.org/>
2. Lorenzo R, Naghavi M, Foreman K, Lim S, Shibuya K, Aboyans V et al., Global and regional mortality from 235 causes of death for 20 age groups in 1990 and 2010: a systematic analysis for the Global Burden of Disease Study 2010. *The Lancet* 2012;380(9858):2095–2128.
3. Hart CWM, Pilling AR, Goodale JC. *The Tiwi of North Australia*. New York: Holt, Rinehart and Winston; 1988.
4. National Archives of Australia. Bishop Francis Xavier Gsell MSC-Fact sheet 151. National Archives of Australia: 2016 [cited 2016, July 7]. Available from: <http://www.naa.gov.au/collection/fact-sheets/fs151.aspx>
5. Commonwealth of Australia. Handbook of the 44th Parliament (2014) "Part 5 - Referendums and Plebiscites - Referendum results". Parliamentary Library of Australia. [cited 2016 Dec 26 ]. Available from: [http://parlinfo.aph.gov.au/parlInfo/download/handbook/newhandbook/2014-10-31/toc\\_pdf\\_repeat/Part%205%20-%20Referendums%20and%20Plebiscites.pdf;fileType=application%2Fpdf](http://parlinfo.aph.gov.au/parlInfo/download/handbook/newhandbook/2014-10-31/toc_pdf_repeat/Part%205%20-%20Referendums%20and%20Plebiscites.pdf;fileType=application%2Fpdf)
6. Kettle E. *Health Services in the Northern Territory – a history 1824-1970. Volume 2*. Australian National University. North Australia Research unit, Darwin; 1991. [cited 2016 Aug 18]. Available from: <https://digitalcollections.anu.edu.au/handle/1885/46992>
7. Hargrave, John C. *The best of both worlds: Aboriginal health then and now*. The Seventh Eric Johnston Lecture, 1992. Occasional papers; no. 36. State Library of the Northern Territory, Darwin; 1993 [cited 2016 Aug 18]. Available from: [https://www.nt.gov.au/\\_\\_data/assets/pdf\\_file/0008/241892/occpaper36.pdf](https://www.nt.gov.au/__data/assets/pdf_file/0008/241892/occpaper36.pdf)
8. Hoy WE. Chronic disease care in remote Aboriginal Australia has been transformed. *Personal View, BMJ* 2013; 347:f6127. doi: <http://dx.doi.org/10.1136/bmj.f6127>
9. Hargrave J. *Medical survey of the Bathurst Island Mission. March-May 1957. Report to the NT Department of health, 1957*. Darwin: Australian Archives, 1957.
10. Commonwealth of Australia. *The Northern Territory Report: 1953-1955*.

- 1  
2  
3 Commonwealth Government, Canberra; 1956 [cited 2016 Aug 23]. Available from:  
4 [http://aiatsis.gov.au/sites/default/files/catalogue\\_resources/59270.pdf](http://aiatsis.gov.au/sites/default/files/catalogue_resources/59270.pdf)  
5  
6  
7 11. Jain SK, editor. Trends in mortality by causes of death in Australia, the States and  
8 Territories during 1971-1992, and in statistical subdivisions during 1991-1992. Cat. No.  
9 3313.0. National Centre for Epidemiology and Population Health and Australian Bureau  
10 of Statistics, Canberra, 1994 [cited 2016 Aug 18]. Available from:  
11 [http://www.ausstats.abs.gov.au/ausstats/free.nsf/0/8C850BD253D26CE3CA25722500](http://www.ausstats.abs.gov.au/ausstats/free.nsf/0/8C850BD253D26CE3CA25722500049511/$File/33130_1971-92.pdf)  
12 [049511/\\$File/33130\\_1971-92.pdf](http://www.ausstats.abs.gov.au/ausstats/free.nsf/0/8C850BD253D26CE3CA25722500049511/$File/33130_1971-92.pdf)  
13  
14  
15  
16  
17 12. Spencer JS, Silva D, Snelling P, Hoy WE. An epidemic of renal failure among Australian  
18 Aborigines. *Med J Aust* 168:537–541, 1998.  
19  
20 13. Australian Indigenous Health *InfoNet*. Chronic conditions: Review of kidney disease  
21 among Indigenous people. Last update Sept 2015. [cited 2016 Sep 01]. Available from:  
22 <http://www.healthinfonet.ecu.edu.au/chronic-conditions>.  
23  
24  
25  
26 14. Hoy WE, Mott SA, McDonald, S. An expanded nationwide view of chronic kidney  
27 disease in Aboriginal Australians. *Nephrology (Carlton)*. 2016 Apr 14. doi:  
28 10.1111/nep.12798. [Epub ahead of print].  
29  
30  
31  
32 15. Hoy WE, Nicol JL. Birthweight and natural deaths in a remote Australian Aboriginal  
33 community. *Med J Aust*. 2010; 192(1): 14-19.  
34  
35  
36 16. Hoy WE, Nicol JL. The Barker hypothesis confirmed: Association of low birthweight and  
37 all- cause natural deaths in adults in a remote Australian Aboriginal community.  
38 Submitted to *J Dev Orig Health Dis.*, May 2017.  
39  
40  
41 17. Australian Bureau of Statistics. Historical Reference and Information. ABS,  
42 Commonwealth of Australia, 11 Sept 2013 [cited 2016 Sep 11]. Available from:  
43 [http://www.abs.gov.au/websitedbs/censushome.nsf/home/historicalinformation?ope](http://www.abs.gov.au/websitedbs/censushome.nsf/home/historicalinformation?opendocument&navpos=320)  
44 [ndocument&navpos=320](http://www.abs.gov.au/websitedbs/censushome.nsf/home/historicalinformation?opendocument&navpos=320)  
45  
46  
47  
48  
49 18. Peterson N, Taylor J. Demographic transition in a hunter-gatherer population the Tiwi  
50 case, 1929-1996. *Australian Aboriginal Studies* 1998;1:11-27.  
51  
52 19. Barker DJP, Osmond C, Golding J, et al. Growth in utero, blood pressure in childhood  
53 and adult life, and mortality from cardiovascular disease. *Br Med J* 1998;298:564–7.  
54  
55  
56 20. Hoy WE, Rees M, Kile E, Mathews JD, Pugsley DJ, Wang Z. Low birth weight and renal  
57 disease in Australian Aborigines. *The Lancet* 352:1826–1827, 1998.  
58  
59  
60

- 1  
2  
3 21. Singh GR, Hoy WE. The association between birth weight and current blood pressure: a  
4 cross-sectional study in an Australian Aboriginal community. *Med J Aust*, 179:532–535,  
5 2003.  
6  
7
- 8 22. Grams ME, Coresh J, Segev DL, Kucirka LM, Tighiouart H, Samak MJ. Vascular Disease,  
9 ESRD, and Death: Interpreting Competing Risk Analyses. *Clin J Am Soc Nephrol*. 2012  
10 Oct 5; 7(10): 1606–1614. Published online 2012 Aug 2. doi: [10.2215/CJN.03460412](https://doi.org/10.2215/CJN.03460412)  
11  
12
- 13 23. Hoy WE, Kincaid-Smith P, Hughson MD, Fogo A, Sinniah R, Dowling J, Samuel T, Mott  
14 SA, Douglas-Denton R, Bertram JF. Invited Review for World Kidney Forum, CKD in  
15 Aboriginal Australians. *American Journal of Kidney Diseases*, 56(5):983-993.2010.  
16  
17
- 18 24. Hoy WE, Kondalsamy Chennakes S, McDonald S P, Cass, A.,Singh G R., Bertram J F,  
19 Hughson M D, Chronic kidney disease in Aboriginal Australians. In: El Nahas M (Ed.),  
20 *Kidney Disease in Ethnic Minorities and the Developing World*. New York, U.S: Taylor &  
21 Francis;2005:305-333.  
22  
23
- 24 25. Australian Institute of Health and Welfare. Assessment of the coding of ESKD in deaths  
25 and hospitalisation data. A working paper using linked hospitalisation and deaths data  
26 from Western Australia and New South Wales. Cat. no. PHE 182. Canberra: AIHW;  
27 2014.  
28  
29
- 30 26. You J, Hoy WE, Zhao Y, Beaver C, Eager K. End-stage renal disease in the Northern  
31 Territory: current and future treatment costs. *Med J Aust* 176(10):461–465, 2002.  
32  
33
- 34 27. Australian Bureau of Statistics. Leading causes of Aboriginal and Torres Strait Islander  
35 deaths. 3303.0 Causes of Death, Australia, 2013. Commonwealth of Australia, 2015.  
36 [cited 2016 Jan 01]. Available from:  
37 [http://www.abs.gov.au/ausstats/abs@.nsf/Lookup/by%20Subject/3303.0~2013~Main  
38 %20Features~Leading%20Causes%20of%20Aboriginal%20and%20Torres%20Strait%20Islander%20Deaths~10015](http://www.abs.gov.au/ausstats/abs@.nsf/Lookup/by%20Subject/3303.0~2013~Main%20Features~Leading%20Causes%20of%20Aboriginal%20and%20Torres%20Strait%20Islander%20Deaths~10015)  
39  
40
- 41 28. Australian Indigenous Health/InfoNet (2016) Summary of Aboriginal and Torres Strait  
42 Islander health, 2015. [cited 2016 Jan 01]. Available from:  
43 from <http://www.healthinonet.ecu.edu.au/health-facts/summary>  
44  
45
- 46 29. World Health Organization. 50 Facts: Global health situation and trends 1955-2025.  
47 World Health Report; 2016 [cited 2016 Aug 23]. Available from:  
48  
49  
50  
51  
52  
53  
54  
55  
56  
57  
58  
59  
60

- 1  
2  
3 [http://www.who.int/whr/1998/media\\_centre/50facts/en/](http://www.who.int/whr/1998/media_centre/50facts/en/)  
4  
5 30. Hill K. The decline of childhood mortality. John Hopkins University;1990 [cited 2016  
6 Aug 23]. Available from: <https://jscholarship.library.jhu.edu/handle/1774.2/936>  
7  
8 31. Northern Territory Department of Health. Mortality in the Northern Territory 1967-  
9 2006. Factsheet. 2011 [cited 2016, August 26]. Available from:  
10 <http://hdl.handle.net/10137/480>  
11  
12 32. Gracey M, Spargo RM. Deaths in Broome, Western Australia, 1883 to 1994. Aust N Z J  
13 Public Health, 1996; 20: 505-511.  
14  
15 33. UNICEF Global Database. Child Mortality Estimates: country-specific under-five  
16 mortality rate. UNICEF, 2015. [cited 2016 Aug 23]. Available from:  
17 <http://data.unicef.org/child-mortality/under-five.html>  
18  
19 34. The World Bank. Life expectancy at birth, total (years). World development indicators.  
20 World Bank Group IBRD IDA, 2016. [cited 2016 Aug 23]. Available from:  
21 <http://data.worldbank.org/indicator/SP.DYN.LE00.IN> Ditto  
22  
23 35. Australian Bureau of Statistics, National Aboriginal and Torres Strait Islander Social  
24 Survey, 2014-15. Cat no. 4714.0. ABS; 2016 [cited 2016 Aug 23]. Available  
25 from: [http://www.abs.gov.au/ausstats/abs@.nsf/Lookup/4714.0main+features12201](http://www.abs.gov.au/ausstats/abs@.nsf/Lookup/4714.0main+features122014-15)  
26 4-15  
27  
28 36. Australian Bureau of Statistics. Australian Aboriginal and Torres Strait Islander Health  
29 Survey: Updated results, 2012-2013. Cat no. 4727.0.55.006; 2014 [cited 2016 Aug 23].  
30 Available from:  
31 [http://www.abs.gov.au/ausstats/abs@.nsf/Lookup/by%20Subject/4727.0.55.006~201](http://www.abs.gov.au/ausstats/abs@.nsf/Lookup/by%20Subject/4727.0.55.006~2012%E2%80%9313~Main%20Features~Overweight%20and%20obesity~12)  
32 [2%E2%80%9313~Main%20Features~Overweight%20and%20obesity~12](http://www.abs.gov.au/ausstats/abs@.nsf/Lookup/by%20Subject/4727.0.55.006~2012%E2%80%9313~Main%20Features~Overweight%20and%20obesity~12).  
33  
34 37. Hoy WE, Manning RW, Tungatalum L, Hoy PW, Mott SA, Eddy D, Ball PA. A profile of  
35 sales audits of a remote Aboriginal community's general store: 1992 and 2011.  
36 ANZJPH, Letter, 38(1):94. 4 Feb 2014:  
37  
38  
39  
40  
41  
42  
43  
44  
45  
46  
47  
48  
49  
50  
51  
52  
53  
54  
55  
56  
57  
58  
59  
60

1  
2  
3 Contributors: WH conceived and designed this work, collected data, directed data analyses,  
4 interpreted the findings and wrote the manuscript. BMcL conducted field work, and  
5 performed data collection and data preparation. SM prepared data, performed analyses and  
6 contributed to interpretation, produced figures and tables, and coordinated preparation  
7 and editing of the manuscript. All authors had full access to all of the data in the study and  
8 can take responsibility for the integrity of the data and the accuracy of the data analysis. All  
9 authors reviewed, revised and approved the manuscript.  
10  
11  
12

13  
14 Funding: This work has been supported by past grants from the National Health and Medical  
15 Research Council of Australia (NHMRC); #511081, #921134, #951250 and #951342, and  
16 from the Colonial Foundation of Australia. It is currently supported by the NHMRC Centre of  
17 Research Excellence in Chronic Kidney Disease in Australia; # 1079502. Past grants have  
18 specifically supported patient recruitment, data collection and data management of a  
19 broader study within which this study is embedded. Current support has enabled analyses  
20 and preparation of this manuscript. The funders had no role in preparation or conduct of  
21 the study or writing or submission of the manuscript.  
22  
23  
24

25  
26 Competing interests: All authors have completed the ICMJE uniform disclosure form  
27 at [www.icmje.org/coi\\_disclosure.pdf](http://www.icmje.org/coi_disclosure.pdf) and declare: authors had financial support from  
28 National Health & Medical Research Council of Australia (Centre for Research Excellence in  
29 Chronic Kidney Disease, APP1079502 and or Australia Fellowship, APP511081) for the  
30 submitted work; no financial relationships with any organisations that might have an  
31 interest in the submitted work in the previous three years; no other relationships or  
32 activities that could appear to have influenced the submitted work.  
33  
34  
35

36  
37 Transparency: The lead author affirms that the manuscript is an honest, accurate, and  
38 transparent account of the study being reported; that no important aspects of the study  
39 have been omitted; and that any discrepancies from the study as planned have been  
40 explained.  
41

42  
43 Ethical approval: Human Research Ethics Committee of the Northern Territory Department  
44 of health and Community Services and Menzies School of Health Research (91/20, 94/02  
45 and 03/51); The University of Queensland (2004000028).  
46

47 Provenance and peer review: Not commissioned; externally peer reviewed.  
48

49 Data sharing statement: Data are potentially accessible for all legitimate parties under  
50 standard and usual conditions.  
51  
52  
53  
54  
55  
56  
57  
58  
59  
60

Table 1. Mean (95%CI) natural death rate per 100,000 population by five-year intervals and age-group

| Time interval | <15 years        | 15-44 years      | 45+ years           | All ages           |
|---------------|------------------|------------------|---------------------|--------------------|
| 1986-1990     | 547.4 (406, 689) | 426.3 (240, 613) | 8065.4 (6778, 9353) | 1480.7 (1240,1721) |
| 2006-2010     | 60.5 (0, 202)    | 326.3 (140, 513) | 2815.2 (1528, 4103) | 716.8 (476,957)    |

Note: The mean of aggregate natural deaths over years 2001-2010 is used for deaths of those <15 years of age.

Sources: 1986-2011 census data, Australian Bureau of Statistics (Catalogues: 1987, #2460.0; 2012,#2002.0).<sup>17</sup>

1  
2  
3  
4  
5  
6  
7  
8  
9  
10  
11  
12  
13  
14  
15  
16  
17  
18  
19  
20  
21  
22  
23  
24  
25  
26  
27  
28  
29  
30  
31  
32  
33  
34  
35  
36  
37  
38  
39  
40  
41  
42  
43  
44  
45  
46  
47  
48  
49  
50  
51  
52  
53  
54  
55  
56  
57  
58  
59  
60

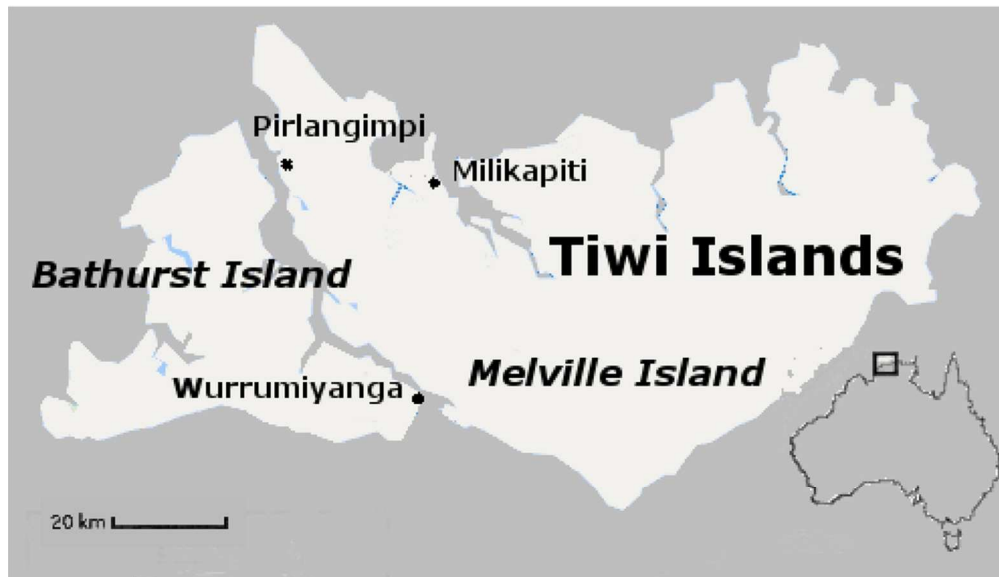

Figure 1. The Tiwi Islands, Northern Territory, Australia

Note: Wurrumiyanga was formerly named Nguui.

Source: Adapted from Google Map data. The Tiwi Islands. Google; ©2017 [cited 2017 Jan 10]. Available from: <https://www.google.com.au/maps/@-12.2087082,130.7314414,8.75z>

100x58mm (300 x 300 DPI)

view only

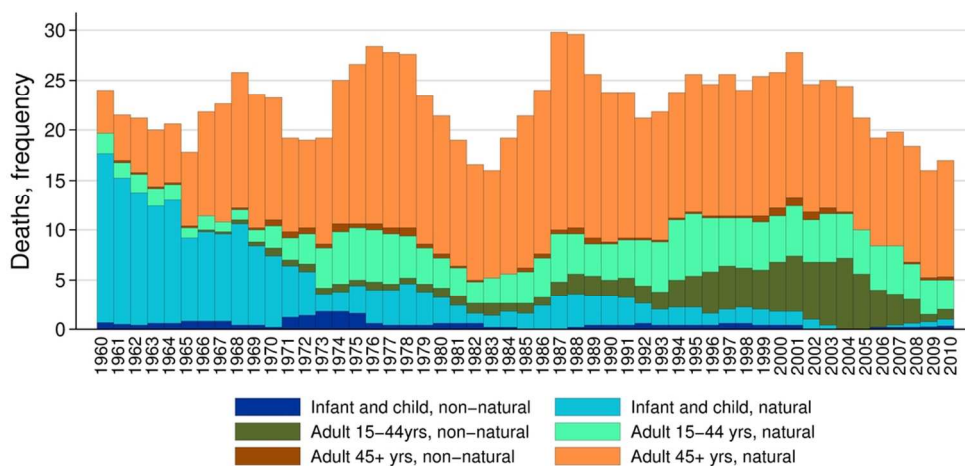

Figure 2. Numbers of Tiwi deaths by age-group and broad cause of death, 1960-2010  
 Note: A five-year rolling average of frequencies is presented; people who have started dialysis are included among natural deaths.

101x50mm (300 x 300 DPI)

Review only



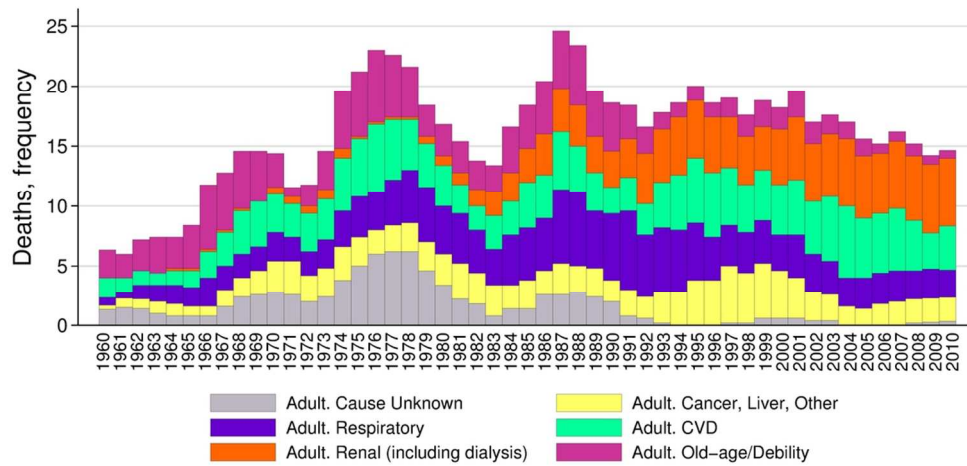

Figure 3. Numbers of Tiwi natural adult deaths by age-group and cause of death, 1960-2010  
Note: A five-year rolling average of frequencies is presented; people who have started dialysis are included among renal deaths.

101x50mm (300 x 300 DPI)

Review only

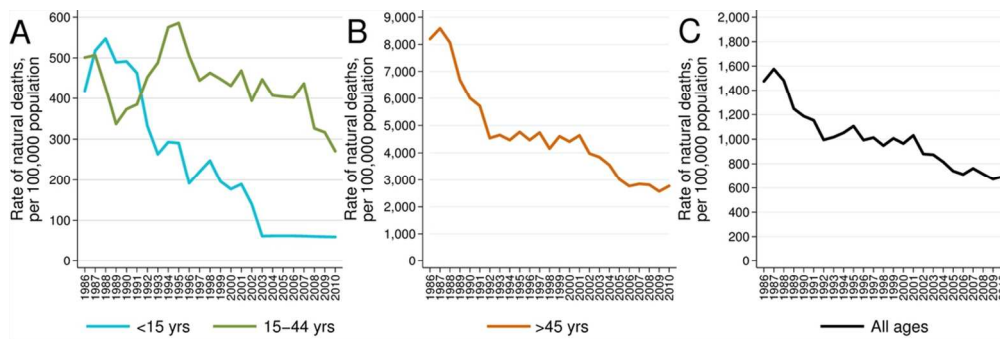

Figures 4 A-C. Tiwi rates of natural death per 100,000 population by age-group, 1986-2010  
 Note: The figure presents a five-year rolling average of natural death rates by age-group: <15 and 15-45 years (A); ≥45 years (B); all ages (C). People who started dialysis are included among natural deaths. The low rates of death depicted for those <15 years from 2003 to 2010 are each based upon the average of the very small number of events (four) that occurred between 2001 and 2010.

Sources of 1986-2010 population data: quinquennial Census estimates (Australian Bureau of Statistics Catalogues: 1987, #2460.0; 1993, #2730.7; 2000, #70609; 2007, #2001.0; 2002, #2002.0; 2012, #2002.0);17

101x33mm (300 x 300 DPI)

Review only

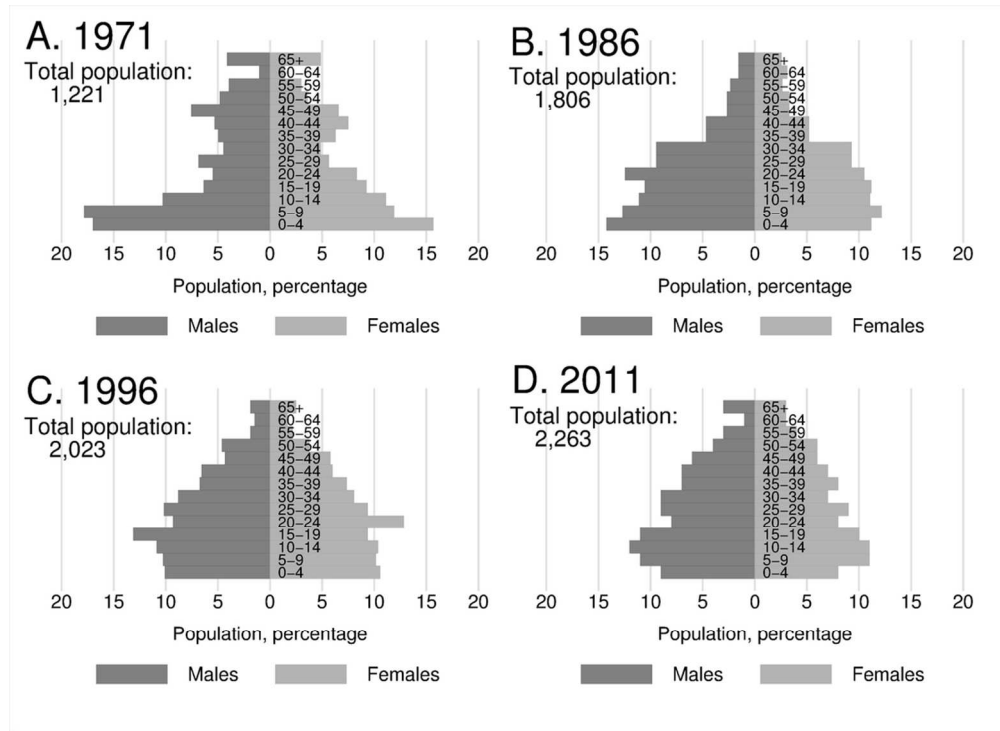

Figures 5 A-D. Age distribution of the Tiwi population at four time-points, by sex, 1971-2011  
 Note: The figure presents population pyramids and total population for 1971 (A); 1986 (B); 1996 (C); 2011 (D).  
 Sources: A, cited in Peterson, 1988;18 B-D, census data, Australian Bureau of Statistics (Catalogues: 1987, #2460.0; 2000, #70609; 2012,#2002.0).17

101x73mm (300 x 300 DPI)

only

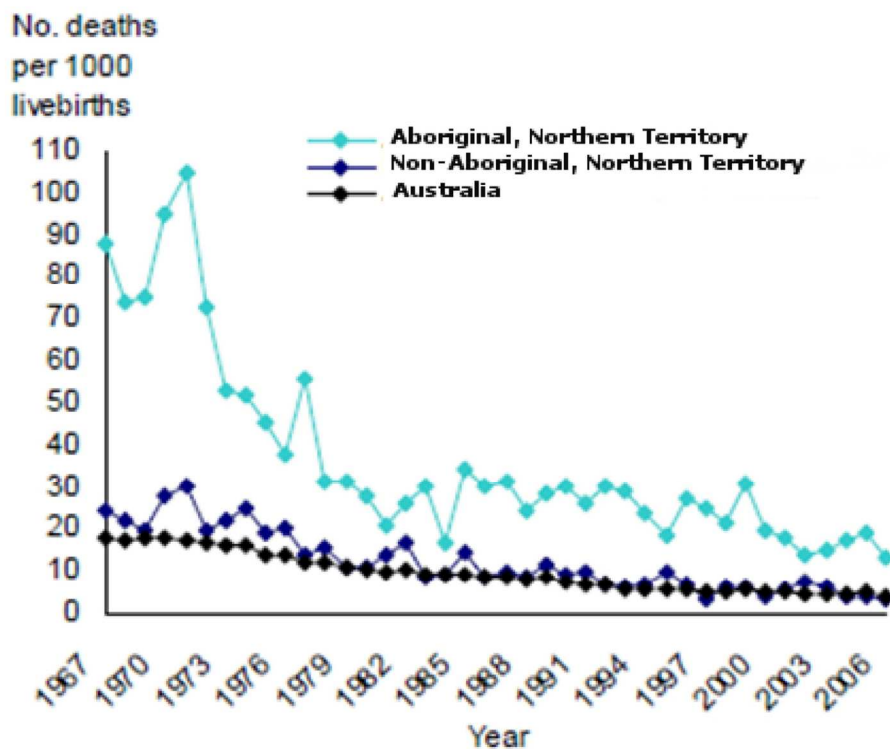

Figure 6. Infant mortality, Northern Territory and Australia, 1967-2007  
 Source: Northern Territory Department of Health, 2011.31

131x103mm (300 x 300 DPI)

For peer review only

1  
2  
3  
4  
5  
6  
7  
8  
9  
10  
11  
12  
13  
14  
15  
16  
17  
18  
19  
20  
21  
22  
23  
24  
25  
26  
27  
28  
29  
30  
31  
32  
33  
34  
35  
36  
37  
38  
39  
40  
41  
42  
43  
44  
45  
46  
47  
48  
49  
50  
51  
52  
53  
54  
55  
56  
57  
58  
59  
60



Figure 7. Leading causes of death in the Aboriginal population of the Northern Territory: 1985-2006  
Source: Northern Territory Department of Health, 2011.31

137x112mm (300 x 300 DPI)

only

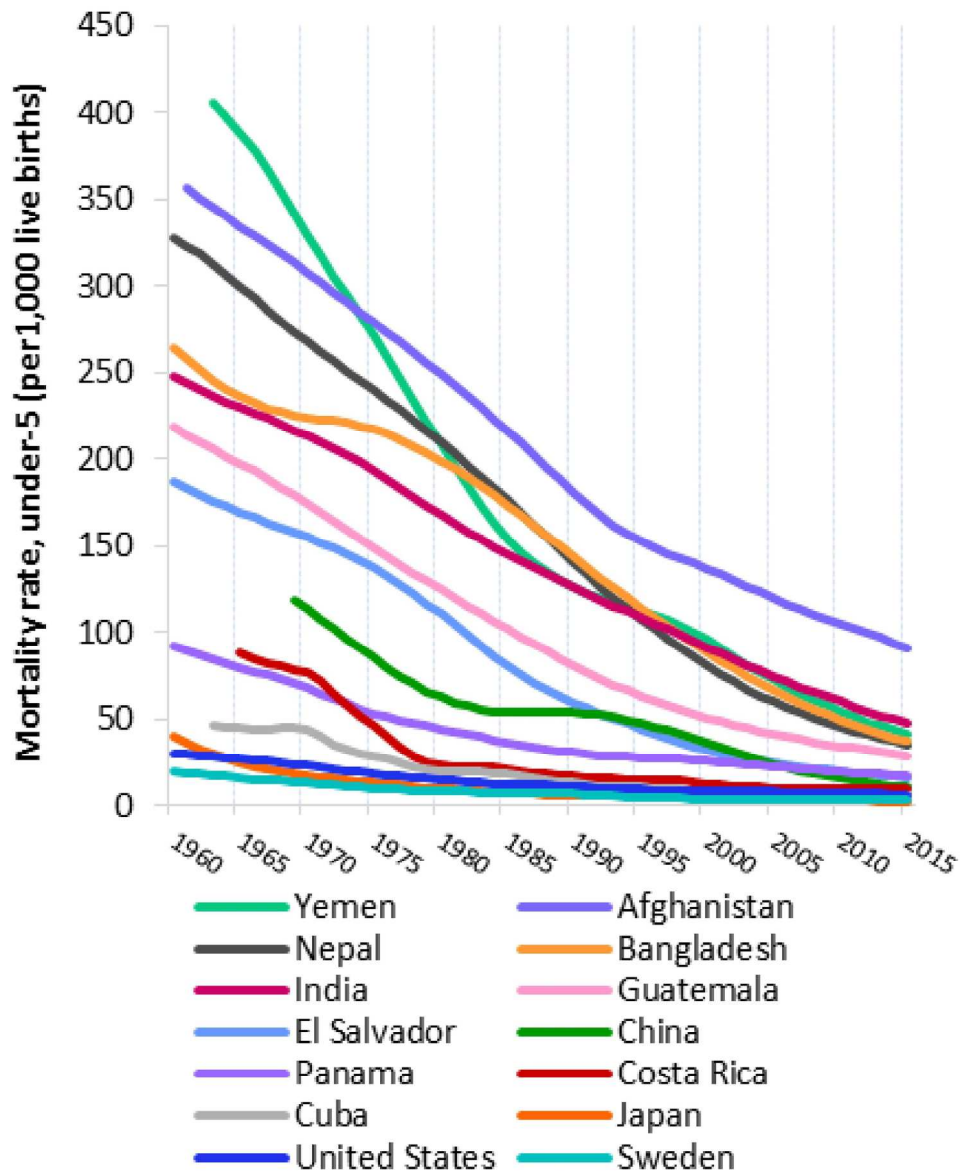

Figure 8. Under-five mortality rates for selected countries, 1960-2015  
 Source: adapted from UNICEF Global Database, 2015.33

189x223mm (300 x 300 DPI)



Figure 9. Life expectancy at birth for selected countries, 1960-2013

Source: adapted from The World Bank, 2016.<sup>34</sup>

Source notes: Derived from male and female life expectancy at birth from sources such as: United Nations Population Division; World Population Prospects; United Nations Statistical Division. Population and Vital Statistics Report (various years); Census reports and other statistical publications from national statistical offices; Eurostat: Demographic Statistics; Secretariat of the Pacific Community: Statistics and Demography Programme; and U.S. Census Bureau: International Database.

189x223mm (300 x 300 DPI)

Supplementary Table 1. Frequencies of Tiwi deaths by age-group and time interval, 1960-2010

| Age-group         | Deaths N (%), by time interval |                  |                 |                  |                 |                  |                  |                  |                  |                 |                 |                    |
|-------------------|--------------------------------|------------------|-----------------|------------------|-----------------|------------------|------------------|------------------|------------------|-----------------|-----------------|--------------------|
|                   | 1960-1964                      | 1965-1969        | 1970-1974       | 1975-1979        | 1980-1984       | 1985-1989        | 1990-1994        | 1995-1999        | 2000-2004        | 2005-2009       | 2010            | Total              |
| Under 15 years    | 69 (65.1)                      | 48 (42.9)        | 29 (30.5)       | 20 (14.4)        | 8 (9.6)         | 17 (11.4)        | 13 (12.3)        | 10 (7.8)         | 5 (4.1)          | 2 (2.0)         | 1 (6.3)         | 222 (19.2)         |
| 15 - <45 years    | 9 (8.5)                        | 6 (5.4)          | 19 (20.0)       | 28 (20.1)        | 16 (19.3)       | 31 (20.8)        | 32 (30.2)        | 46 (35.9)        | 50 (40.7)        | 40 (40.4)       | 2 (12.5)        | 279 (24.1)         |
| 45 years and over | 28 (26.4)                      | 58 (51.8)        | 47 (49.5)       | 91 (65.5)        | 59 (71.1)       | 101 (67.8)       | 61 (57.6)        | 72 (56.3)        | 68 (55.3)        | 57 (57.6)       | 13 (81.3)       | 655 (56.7)         |
| <b>Total</b>      | <b>106 (100)</b>               | <b>112 (100)</b> | <b>95 (100)</b> | <b>139 (100)</b> | <b>83 (100)</b> | <b>149 (100)</b> | <b>106 (100)</b> | <b>128 (100)</b> | <b>123 (100)</b> | <b>99 (100)</b> | <b>16 (100)</b> | <b>1,156 (100)</b> |

Note: 5-yearly time intervals are presented except for the single year of 2010; people who started dialysis are included among deaths



## STROBE Statement—checklist of items that should be included in reports of observational studies

|                           | Item No | Recommendation                                                                                                                                                                                                                                                                                                                                                                                                                                                                                        | Page No.(s) [Paragraph No.(s)] |
|---------------------------|---------|-------------------------------------------------------------------------------------------------------------------------------------------------------------------------------------------------------------------------------------------------------------------------------------------------------------------------------------------------------------------------------------------------------------------------------------------------------------------------------------------------------|--------------------------------|
| <b>Title and abstract</b> | 1       | (a) Indicate the study's design with a commonly used term in the title or the abstract                                                                                                                                                                                                                                                                                                                                                                                                                | 1                              |
|                           |         | (b) Provide in the abstract an informative and balanced summary of what was done and what was found                                                                                                                                                                                                                                                                                                                                                                                                   | 2                              |
| <b>Introduction</b>       |         |                                                                                                                                                                                                                                                                                                                                                                                                                                                                                                       |                                |
| Background/rationale      | 2       | Explain the scientific background and rationale for the investigation being reported                                                                                                                                                                                                                                                                                                                                                                                                                  | 3[1-9]                         |
| Objectives                | 3       | State specific objectives, including any prespecified hypotheses                                                                                                                                                                                                                                                                                                                                                                                                                                      | 3[1]                           |
| <b>Methods</b>            |         |                                                                                                                                                                                                                                                                                                                                                                                                                                                                                                       |                                |
| Study design              | 4       | Present key elements of study design early in the paper                                                                                                                                                                                                                                                                                                                                                                                                                                               | 4[6]-5[5]                      |
| Setting                   | 5       | Describe the setting, locations, and relevant dates, including periods of recruitment, exposure, follow-up, and data collection                                                                                                                                                                                                                                                                                                                                                                       | 4[6]-5[5]                      |
| Participants              | 6       | (a) <i>Cohort study</i> —Give the eligibility criteria, and the sources and methods of selection of participants. Describe methods of follow-up<br><i>Case-control study</i> —Give the eligibility criteria, and the sources and methods of case ascertainment and control selection. Give the rationale for the choice of cases and controls<br><i>Cross-sectional study</i> —Give the eligibility criteria, and the sources and methods of selection of participants                                | 4[4] 5[5]                      |
|                           |         | (b) <i>Cohort study</i> —For matched studies, give matching criteria and number of exposed and unexposed<br><i>Case-control study</i> —For matched studies, give matching criteria and the number of controls per case                                                                                                                                                                                                                                                                                | -                              |
| Variables                 | 7       | Clearly define all outcomes, exposures, predictors, potential confounders, and effect modifiers. Give diagnostic criteria, if applicable                                                                                                                                                                                                                                                                                                                                                              | 4[5]-5[4]                      |
| Data sources/measurement  | 8*      | For each variable of interest, give sources of data and details of methods of assessment (measurement). Describe comparability of assessment methods if there is more than one group                                                                                                                                                                                                                                                                                                                  | 4[5]-5[4]                      |
| Bias                      | 9       | Describe any efforts to address potential sources of bias                                                                                                                                                                                                                                                                                                                                                                                                                                             | 5[1-3] 7[3-4] 8[1,3]           |
| Study size                | 10      | Explain how the study size was arrived at                                                                                                                                                                                                                                                                                                                                                                                                                                                             | 4[5]-5[3]                      |
| Quantitative variables    | 11      | Explain how quantitative variables were handled in the analyses. If applicable, describe which groupings were chosen and why                                                                                                                                                                                                                                                                                                                                                                          | 4[5]-5[4]                      |
| Statistical methods       | 12      | (a) Describe all statistical methods, including those used to control for confounding                                                                                                                                                                                                                                                                                                                                                                                                                 | 5[3]                           |
|                           |         | (b) Describe any methods used to examine subgroups and interactions                                                                                                                                                                                                                                                                                                                                                                                                                                   | 5[4]                           |
|                           |         | (c) Explain how missing data were addressed<br><br>We believe that the ascertainment of deaths overall is as good as it can be. We have accessed the original sources for this information (4[5]). There are no published government estimates prior to 1985. From 1985, our ascertainment compares favourably with that of government agencies (8[3]). Subjects included are those with available death data, plus age at death or age-group and natural or unnatural cause of death classification. |                                |

As a more detailed description of the cause of death was not consistently documented until after 1985 we restricted analyses by cause of death to 1985-2010. Additionally, as census data also became available from that time, death rates were calculated in the same time period.

(d) *Cohort study*—If applicable, explain how loss to follow-up was addressed

*Case-control study*—If applicable, explain how matching of cases and controls was addressed

*Cross-sectional study*—If applicable, describe analytical methods taking account of sampling strategy

(e) Describe any sensitivity analyses

Continued on next page

| Results           |     | Page No.(s)<br>[Paragraph<br>No.(s)]                                                                                                                                                                                                                                                                                                                                                                          |
|-------------------|-----|---------------------------------------------------------------------------------------------------------------------------------------------------------------------------------------------------------------------------------------------------------------------------------------------------------------------------------------------------------------------------------------------------------------|
| Participants      | 13* | (a) Report numbers of individuals at each stage of study—eg numbers potentially eligible, examined for eligibility, confirmed eligible, included in the study, completing follow-up, and analysed                                                                                                                                                                                                             |
|                   |     | (b) Give reasons for non-participation at each stage                                                                                                                                                                                                                                                                                                                                                          |
|                   |     | (c) Consider use of a flow diagram                                                                                                                                                                                                                                                                                                                                                                            |
| Descriptive data  | 14* | (a) Give characteristics of study participants (eg demographic, clinical, social) and information on exposures and potential confounders                                                                                                                                                                                                                                                                      |
|                   |     | (b) Indicate number of participants with missing data for each variable of interest                                                                                                                                                                                                                                                                                                                           |
|                   |     | (c) <i>Cohort study</i> —Summarise follow-up time (eg, average and total amount)                                                                                                                                                                                                                                                                                                                              |
| Outcome data      | 15* | <i>Cohort study</i> —Report numbers of outcome events or summary measures over time                                                                                                                                                                                                                                                                                                                           |
|                   |     | <i>Case-control study</i> —Report numbers in each exposure category, or summary measures of exposure                                                                                                                                                                                                                                                                                                          |
|                   |     | <i>Cross-sectional study</i> —Report numbers of outcome events or summary measures                                                                                                                                                                                                                                                                                                                            |
| Main results      | 16  | (a) Give unadjusted estimates and, if applicable, confounder-adjusted estimates and their precision (eg, 95% confidence interval). Make clear which confounders were adjusted for and why they were included<br>(b) Report category boundaries when continuous variables were categorized<br>(c) If relevant, consider translating estimates of relative risk into absolute risk for a meaningful time period |
| Other analyses    | 17  | Report other analyses done—eg analyses of subgroups and interactions, and sensitivity analyses                                                                                                                                                                                                                                                                                                                |
| <b>Discussion</b> |     |                                                                                                                                                                                                                                                                                                                                                                                                               |
| Key results       | 18  | Summarise key results with reference to study objectives                                                                                                                                                                                                                                                                                                                                                      |
| Limitations       | 19  | Discuss limitations of the study, taking into account sources of potential bias or imprecision. Discuss both direction and magnitude of any potential bias                                                                                                                                                                                                                                                    |
| Interpretation    | 20  | Give a cautious overall interpretation of results considering objectives, limitations, multiplicity of analyses, results from similar studies, and other relevant evidence                                                                                                                                                                                                                                    |

1  
2 Generalisability 21 Discuss the generalisability (external validity) of the study results 9[1]

---

3 **Other information**

---

4 Funding 22 Give the source of funding and the role of the funders for the present study and, 11[3]  
5 if applicable, for the original study on which the present article is based  
6  
7

8 \*Give information separately for cases and controls in case-control studies and, if applicable, for exposed and  
9 unexposed groups in cohort and cross-sectional studies.  
10

11 **Note:** An Explanation and Elaboration article discusses each checklist item and gives methodological background and  
12 published examples of transparent reporting. The STROBE checklist is best used in conjunction with this article (freely  
13 available on the Web sites of PLoS Medicine at <http://www.plosmedicine.org/>, Annals of Internal Medicine at  
14 <http://www.annals.org/>, and Epidemiology at <http://www.epidem.com/>). Information on the STROBE Initiative is  
15 available at [www.strobe-statement.org](http://www.strobe-statement.org).  
16  
17  
18  
19  
20  
21  
22  
23  
24  
25  
26  
27  
28  
29  
30  
31  
32  
33  
34  
35  
36  
37  
38  
39  
40  
41  
42  
43  
44  
45  
46  
47  
48  
49  
50  
51  
52  
53  
54  
55  
56  
57  
58  
59  
60

# BMJ Open

## Transformation of mortality in a remote Australian Aboriginal community: a retrospective observational study

|                                 |                                                                                                                                                                                                                                                                                                                                                    |
|---------------------------------|----------------------------------------------------------------------------------------------------------------------------------------------------------------------------------------------------------------------------------------------------------------------------------------------------------------------------------------------------|
| Journal:                        | <i>BMJ Open</i>                                                                                                                                                                                                                                                                                                                                    |
| Manuscript ID                   | bmjopen-2017-016094.R2                                                                                                                                                                                                                                                                                                                             |
| Article Type:                   | Research                                                                                                                                                                                                                                                                                                                                           |
| Date Submitted by the Author:   | 28-Jun-2017                                                                                                                                                                                                                                                                                                                                        |
| Complete List of Authors:       | Hoy, Wendy; The University of Queensland, Centre for Chronic Disease, UQCCR, Faculty of Medicine<br>Mott, Susan; The University of Queensland, Centre for Chronic Disease, UQCCR, Faculty of Medicine<br>McLeod, Beverly ; The University of Queensland, Centre for Chronic Disease, UQCCR, Faculty of Medicine; Menzies School of Health Research |
| <b>Primary Subject Heading</b>: | Epidemiology                                                                                                                                                                                                                                                                                                                                       |
| Secondary Subject Heading:      | Public health                                                                                                                                                                                                                                                                                                                                      |
| Keywords:                       | Australian Aboriginal, Mortality transition, Demographic profile, Remote-living, Chronic disease                                                                                                                                                                                                                                                   |
|                                 |                                                                                                                                                                                                                                                                                                                                                    |

SCHOLARONE™  
Manuscripts

1  
2  
3 **Transformation of mortality in a remote Australian Aboriginal community: a retrospective**  
4  
5 **observational study**  
6

7  
8 **Hoy WE**  
9

10 *Corresponding author,*

11 The University of Queensland,

12  
13 Director of the CKD.CRE and the Centre for Chronic Disease and Professor of Medicine

14  
15 Centre for Chronic Disease, Faculty of Medicine, The University of Queensland, Health  
16  
17 Sciences Building, Level 8, Royal Brisbane & Women's Hospital , Herston, Queensland 4029,  
18  
19 Australia. w.hoy@uq.edu.au, +61 7 3346 4809;  
20

21 **Mott SA**  
22

23 The University of Queensland,

24  
25 Senior Research Officer,  
26

27  
28 Centre for Chronic Disease, Faculty of Medicine, The University of Queensland, Health  
29  
30 Sciences Building, Level 8, Royal Brisbane & Women's Hospital , Herston, Queensland 4029,  
31  
32 Australia;  
33

34 **McLeod BJ**  
35

36 Retired,

37  
38 Centre for Chronic Disease, Faculty of Medicine, The University of Queensland, Health  
39  
40 Sciences Building, Level 8, Royal Brisbane & Women's Hospital , Herston, Queensland 4029,  
41  
42 Australia; and Menzies School of Health Research, Royal Darwin Hospital Campus, PO Box  
43  
44 41096, Casuarina NT 0811.  
45  
46  
47  
48  
49  
50  
51  
52  
53  
54  
55  
56  
57  
58  
59  
60

## Abstract

**Objectives** To describe trends in ages and causes of deaths in a remote-living Australian Aboriginal group over a recent 50 year period.

**Design** A retrospective observational study, from 1960 to 2010, of deaths and people starting dialysis, using data from local clinic, parish, dialysis and birthweight registers.

**Setting** A remote island community in the Top End of Australia's Northern Territory, where a Catholic Mission was established in 1911. The estimated Aboriginal population was about 800 in 1960 and 2,260 in 2011.

**Participants** All Aboriginal residents of this community whose deaths had been recorded.

**Outcome measures** Annual frequencies and rates of terminal events (deaths and dialysis starts) by age-group and cause of death.

**Results** In all, and against a background of high rates of low birthweight, 223 deaths in infants and children and 934 deaths in adults (age  $\geq 15$  years) were recorded; 88% were of natural causes. Most deaths in the 1960s were in infants and children. However, these fell dramatically, across the birthweight spectrum, while adult deaths progressively increased. The leading causes of adult natural deaths were chronic lung disease, cardiovascular disease and, more recently, renal failure, and rates were increased two-fold in those of low birthweight. However, rates of natural adult deaths have been falling briskly since 1986, most markedly among people of age 45+ years. The population is increasing and its age structure is maturing.

**Conclusions** The changes in death profiles, the expression of the Barker hypothesis and the ongoing increases in adult life expectancy, reflect epidemiologic and health transitions of astonishing rapidity. These probably flow from advances in public health policy and health care delivery, as well as improved inter-sectoral services, which are all to be celebrated. Other remote communities in Australia are experiencing the same phenomena, and similar events are well advanced in many developing countries.

## Strengths and limitations of this study

- The broad sweep and historical depth of this study, the unique data sources and the integration of clinical and demographic information have allowed delineation of the profound and recent transformation of mortality not previously appreciated in the Australian Aboriginal setting.
- It is inevitable that we have failed to capture some deaths in the past, which probably resulted in understatement of the magnitude of this transition. In some recorded natural deaths the assignments were approximate and the contribution of multiple causes was underestimated.

## Background

Recent literature describes a rapid shift in patterns and causes of death in most countries and regions. Infant and childhood deaths have decreased, life expectancy has increased,<sup>1</sup> and more deaths in adults are associated with non-communicable chronic diseases.<sup>2</sup> Here we describe such a transition in a remote-living Aboriginal Australian group over the last 51 years.

The Tiwi people live in three major communities (and several smaller ones) on Bathurst and Melville Islands off the coast of the Northern Territory, about 90 km by sea from Darwin (Figure 1). They lived in relative isolation for perhaps 7,000 to 15,000 years, and consider themselves distinct from mainland Aboriginal people, with their own unique origins, language, and customs.<sup>3</sup>

In 1911, a Catholic mission was established by the Missionaries of the Sacred Heart (MSC), led by Father Francis Xavier Gsell.<sup>4</sup> Changes followed in lifestyle (from nomadic hunter gatherers to living in fixed dwellings), in diet (from food from the bush and sea to depot supplies of less perishable, high caloric density food, of flour, fat, meat and sugar), in family and community structures (from polygamy and networks of carers within extended families to monogamy), and in the establishment of dormitories, schools and clinics. Transition has been especially accelerated since World War 2. Cigarettes were widely introduced around this time (anecdotal evidence). The 1967 referendum formally recognised Aboriginal people in Australia<sup>5</sup> and they were thenceforth included as residents in the national census. Legal access to alcohol began around that time. The first social club, serving alcohol, was opened in the largest Tiwi community in 1967.

Some early insights into remote-living Aboriginal people in the NT are provided by Ellen Kettle, the first Rural Survey Sister in the NT, who pioneered mobile health work in isolated areas and established health records for individuals, and by Dr John Hargrave, the first Aboriginal Health Officer, who personally examined members of many communities in 1957/1958. Both advanced understanding of Aboriginal health and development of services and policy. They described endemic conditions (yaws, malaria, infestations, trachoma), imported conditions like leprosy, syphilis (arguably), tuberculosis, measles, small pox and influenza. They documented florid malnutrition and frank starvation, high infant and maternal mortality and conspicuously low birthweight. They then described, over time, dramatic reductions in infant mortality, the appearance of alcohol related disorders, and of occasional overweight and obesity, as well as the emergence of non-communicable chronic diseases.<sup>6,7</sup>

These phenomena occurred against a background of continuous improvements in remote Aboriginal health services, including management of infections and infestations, immunisations, better obstetric services, better maternal and child care, and cancer surveillance. Chronic non-communicable diseases, predominantly type 2 diabetes,

1  
2  
3 cardiovascular disease, chronic lung disease and chronic kidney disease now dominate the  
4 adult health profile and are the focus of most of health service provision for remote-living  
5 Australian Aboriginal adults.<sup>8</sup>  
6

7  
8 Clinical services were established by the mission, starting as first aid facilities on the beach  
9 at Nguuu (now Wurrumiyanga) on Bathurst Island. These eventually evolved into a clinic and  
10 local hospital, run by the Sisters of the Order of Our Lady of Sacred Heart (OLSH), with  
11 additional clinics in the Melville Island communities of Milikapiti and Pirlangimpi. Medical  
12 records were established for individuals, along with clinic-based registers for births and  
13 deaths. Doctors from Darwin eventually provided backup support. More recently, there  
14 have been resident doctors for intermittent periods. Local hospital beds were closed in the  
15 early 1990s, and all persons needing hospital admission were thenceforth streamed to the  
16 Royal Darwin Hospital, transported by small plane. Responsibility for clinical services was  
17 transferred from the mission to the NT government in the early/mid-1990s.  
18  
19

20  
21  
22 Anthropologist Charles Hart enumerated a Tiwi population of 1,062 in 1928.<sup>3</sup> Dr John  
23 Hargrave estimated the Tiwi population at about 800 to 900 in 1957, compatible with a  
24 1954 Commonwealth Government estimate of 920.<sup>9,10</sup> Regular government census  
25 estimates have been published every five years since 1986.  
26  
27

28  
29 Traditionally, Tiwi people have only occasionally transmigrated, usually for purposes of  
30 intermarriage according to tribal edicts. The destinations of people who travel, and the  
31 movements and locations of community members, are known by all. Deaths of people who  
32 die out of community (usually in Darwin or while visiting other communities) are  
33 documented in their medical records on in their “home” community clinic and added to the  
34 death register.  
35  
36

37  
38 Death rates in the Tiwi community, along with those in Aboriginal people in Arnhem Land,  
39 have among been the highest in Australia: in the 1990s, with age-standardisation, they were  
40 six times those of the Australian mainstream.<sup>11</sup> This generally reflects the much younger age  
41 of Tiwi people at death. Cases of kidney failure began to attract attention in the 1980s;<sup>12</sup> for  
42 several decades Tiwi people had the highest rates of renal failure yet described, and the first  
43 hemodialysis unit in a remote Aboriginal location was established in Wurrumiyanga on  
44 Bathurst Island in the late 1990s. High renal failure rates have followed in other remote  
45 communities. The characteristics and speculative causes of the renal disease have been  
46 described extensively.<sup>12,13,14</sup> We have previously described the high rates of low  
47 birthweight in this community and the risk exacerbations for natural deaths in infants,  
48 children and young adults associated with low birthweight.<sup>15,16</sup>  
49  
50  
51  
52

### 53 **Aims and objectives**

54  
55 To describe trends in mortality over more than fifty years in a remote Aboriginal community  
56 in the Northern Territory (NT) of Australia.  
57  
58  
59  
60



## Methods

Data sources were the written logs of deaths maintained by the clinics, dialysis unit records of NT Renal Services, and in this staunchly Catholic community, records maintained by the parish priests of all funerals and burials. We report recorded deaths over the 51 year period from 1960 to 2010, beginning when clinic recording of details of death (age, date and explanation) was becoming more systematic.

One thousand, one hundred and ninety deaths were ascertained, and with exclusion of 34 who lacked a recorded cause of death, date of birth or date of death, 1,156 were included in analyses. Amongst them, some details were sometimes still lacking. Eighty five of 1,017 people (8.4%) who died as adults (at  $\geq 15$  years of age) of natural causes, did not have a precise cause of death recorded: they were described as natural deaths of unknown cause. Deaths of misadventure had been clearly documented. Deaths in those age  $< 15$  years had clear natural or non-natural death assignments.

Age was documented or age group was inferred for the 1,156 deaths. Analyses were conducted using broad age-groups, rather than a single year of age. Sixteen death records lacked a date of birth but did have date of death and cause of death – based on cause of death, clinical judgement and local knowledge they were assigned an age of 50 years, which put them into the category of the oldest adults ( $\geq 45$  years). Five did not have date of birth but did have date of death and cause of death had been recorded as old age. They were assigned an age of death of 60 years, which also put them into the category of the oldest adults ( $\geq 45$  years).

Starting in the 1980s, maintenance dialysis has been available to Tiwi persons with end-stage renal disease; numbers of patients starting treatment increased steadily until apparently stabilising at about 6 persons a year in the early 2000s. In this study, initiation of dialysis is considered a natural (renal) death, occurring when dialysis began, because without that treatment all participants would have died shortly thereafter. There was no additional assignment of date or cause of death when they finally expired.

Description of cause of death became more detailed over time. In the early years the only discrimination for some deaths was of natural versus unnatural causes, while, in later years, there was more detailed narrative on cause(s) and associations of death. In the early years, deaths in people over 60 years of age often received a causal assignment of “old age” or “debility”, but with time “disease or organ-specific” assignments increased for them as well. In some recorded natural deaths the assignments were approximate and the contribution of multiple causes was underestimated. Cause of death was assigned by clinic directors and always took into account the previous health profile of each deceased person. In the context of sometimes sparse clinical detail, and conforming to the methodology for the Global Burden of Disease study, we derived and assigned a principal cause of death only.

Unnatural deaths, or deaths of misadventure, included those due to vehicular accidents, drownings, fire (burns and smoke inhalation), homicide, suicide, poisonings, jelly fish stings,

1  
2  
3 crocodile and shark attacks etc. We defined the main categories of natural deaths as  
4 cardiovascular (heart attack, congestive heart failure, ischemic heart disease, coronary  
5 artery disease and stroke), respiratory (chronic lung disease, chronic obstructive airways  
6 disease, chronic bronchitis, bronchiectasis, pneumonia), renal (death with terminal renal  
7 failure, and also, after 1985, institution of dialysis in people with terminal renal failure),  
8 various other causes (eg sepsis, liver failure, lupus, cancer etc.), and debility or old age.  
9 When there was uncertainty about deaths or persons, data were checked with several  
10 senior community members, who had lived through much of the study interval and had  
11 known most community members.  
12  
13  
14

15  
16 Analyses were conducted using Stata 14 (StataCorp. 2015. *Stata Statistical Software:  
17 Release 14*. College Station, TX: StataCorp LP). Numbers and rates of deaths were calculated  
18 by age-group and cause of death. Five-year moving averages were created using the  
19 tssmooth package. Mortality rates, per 100,000 population, could be calculated only since  
20 1986, the first year of the subsequent quinquennial national census that specifically  
21 enumerated Aboriginal Tiwi people. Total population estimates were also taken from census  
22 figures.<sup>17</sup>  
23  
24  
25

## 26 Results

27  
28 Among the 1,156 deaths, 222 (19.2 %) were in infants and children (<1 years and 1 to <15  
29 years respectively), and 934 (78.5%) were deaths of adults (at ages  $\geq 15$  years). Twenty-five  
30 (11.3%) deaths of infants and children were deaths of misadventure and 197 (88.7%) were  
31 of natural causes. Among adults, 114 (12.2%) of deaths were due to misadventure and 820  
32 (87.8%) were natural deaths.  
33  
34  
35

36 Figure 2 shows numbers of all deaths by major cause group (natural and misadventure),  
37 age-group and interval (frequencies are tabulated in Supplementary Table 1). Early on, most  
38 deaths were in infants and children. These fell rapidly at first, then more slowly. The main  
39 categories of death in infants and children were diarrhoea, respiratory disease and failure to  
40 thrive, with some cases of sudden infant death, and a few congenital abnormalities.<sup>15</sup> In  
41 1973, a house fire killed six siblings, making a major contribution to deaths of misadventure  
42 in this group.  
43  
44  
45

46 As infant and childhood deaths fell, numbers of deaths of adults increased. Many of these  
47 have been among young adults (ages 15 to <45 years) with high numbers of both natural  
48 death and deaths of misadventure. The latter include motor vehicle accidents, drownings,  
49 homicide, and suicide; there were 50 suicides (50% of deaths of misadventure) between  
50 1985 and 2010, of which 47 (94%) were among males.  
51  
52  
53

54 Since 1975 most deaths are in people of  $\geq 45$  years, and most of these are of natural causes.  
55 The numbers have not perceptibly increased since the early 1990s. Only 13 (2.5%) of these  
56 older adult deaths were due to misadventure.  
57  
58  
59  
60

1  
2  
3 Figure 3 shows the trends in natural deaths in adults over time, by primary causal  
4 assignment. Numbers peaked in the later 1980s but have since had an indeterminate or  
5 falling trend. Through the mid-1980s there were substantial numbers of natural deaths with  
6 no further details and deaths with assignments of “old age” or debility”, but there have  
7 been more “organ-system” assignments since the early 1990s. Among specific assignments,  
8 cardiovascular deaths, and cancer/liver/other deaths were represented over the continuum,  
9 while pulmonary (respiratory) deaths became prominent but more recently have been  
10 decreasing. Renal deaths become prominent in the 1980s; there were 25 renal deaths in the  
11 1980s, 42 in the 1990s and 52 from 2000 to 2009, constituting 14·7, 24·1 and 31·7% of all  
12 natural deaths in those intervals.  
13  
14  
15  
16

17  
18 Figures 4 A-C show the smoothed estimated rates of natural deaths by age-group since  
19 1986.<sup>17</sup> Rates of death in infants and children have fallen remarkably (4A). There was an  
20 early increase in death rates among young adults (4A), followed by a progressive decline  
21 since the mid-1990s. Death rates of people age  $\geq 45$  years have markedly declined, at least  
22 until the last few years of the observation interval (4B). The net effect of all these changes  
23 is a decrease overall death rates of the entire population.  
24  
25

26  
27 These trends are further summarised in Table 1, which shows the rates of natural deaths by  
28 age-group in the first and last 5-year blocks of the observation interval. Death rates of  
29 infants and children fell by 88·9 %, those of young adults fell by 23·5%, while of people age  
30  $\geq 45$  years fell by 65·1%. For the population as a whole, rates of natural death fell by 51·6 %.  
31  
32

33  
34 Figures 5 A-D show that the population age structure has changed over <40 years to include  
35 higher numbers and proportions of young and middle age adults.<sup>17,18</sup> In addition, the size of  
36 the total population has increased by 85%.  
37

### 38 Discussion

39  
40 This is the most complete description of deaths in any indigenous Australian community. It  
41 shows a profound change in patterns, rates and causes of death over a 51 year interval.  
42 Infant and childhood deaths have fallen dramatically; now most people die as adults ( $\geq 15$   
43 years), and of natural causes. Furthermore, in the last 25 years, rates of natural deaths of  
44 adults have been falling. The population is increasing and is progressively ageing.  
45  
46

47  
48 With continued improvements in prevention and treatment of infectious diseases, adult  
49 deaths are increasingly due to non-communicable diseases, with chronic lung disease,  
50 cardiovascular disease and renal disease making the greatest contribution. These chronic  
51 diseases have usually overlapped and been co-contributors to death, although this is  
52 obscured by our use of mutually exclusive categories of primary cause of adult death.  
53 Among specific assignments, cardiovascular deaths, and cancer/liver/other deaths etc. have  
54 been represented over several decades, while pulmonary deaths became prominent in the  
55 1970s, but have decreased since the early 1990s. Kidney failure has become prominent  
56 since the 1980s, and is now the single leading assignment.  
57  
58  
59  
60

1  
2  
3  
4 The still excessive (although improving) rates of natural deaths are compatible with the  
5 “Barker hypothesis”, which proposes that survivors of lower birthweights have accentuated  
6 susceptibility to chronic diseases and premature natural death in adult life.<sup>15,16,19</sup> We have  
7 shown that the dramatic reductions in early life mortality have been experienced across the  
8 birthweight spectrum, so that, against a background of seriously low birthweights, large  
9 cohorts of underweight infants, who were previously at greatest risk for early death, have  
10 now survived to adult life. As adults, they have enhanced susceptibility to chronic disease, as  
11 the hypothesis proposes and as we have demonstrated.<sup>15,20,21</sup> Through 2010, rates of  
12 natural adult deaths before the age of 41, in Tiwi people of low birthweight, were twice that  
13 of those with higher birthweights, with the greatest accentuation of risk being for  
14 pulmonary deaths, a 6-fold increase.<sup>16</sup>

15  
16  
17  
18  
19 The continued evolution of the chronic disease rates and patterns and rates over time is  
20 probably influenced by improving birthweights, changing age structure among adults,  
21 improved prevention, screening and management of chronic disease and changes in  
22 competing causes of deaths. With reductions in deaths from pulmonary disease and  
23 postponement of cardiovascular deaths, flowing from a secular increase in birthweights,<sup>13</sup>  
24 and from better medical management, coexisting nephropathy has more opportunity to  
25 pursue its more leisurely course to renal failure.<sup>22</sup> We have published extensively on the  
26 expression, course and biopsy representation of the underlying renal disease.<sup>12</sup> It is clearly  
27 multideterminant with risk enhanced by low birthweights, inflammation and infection,  
28 episodes of post-streptococcal glomerulo nephritis and higher BMIs and diabetes in adult  
29 life.<sup>23,24</sup>

30  
31  
32  
33  
34  
35 Availability and use of the clinic-based death records and the supporting parish burial  
36 records sets this study apart. The NT-wide government register of deaths dates only back to  
37 the mid-1980s, and in that register, community assignment has sometimes been  
38 incomplete. Moreover, government records do not capture the full burden of renal failure,  
39 due to deficient documentation of a renal cause of death, both in people receiving renal  
40 replacement therapy (RRT), and in those dying of renal failure without receiving RRT.<sup>14,25</sup>  
41 Our composite definition of “renal deaths” as the start of RRT and a renal death without RRT  
42 more fully reveals the burden of renal failure disease. That approach is necessary for  
43 monitoring, prevention and intervention strategies, especially in the context of the burden  
44 and costs of RRT.<sup>13,26</sup> Furthermore, it is the only way that kidney failure rates can be  
45 compared with populations in other countries for whom RRT is not widely available.

46  
47  
48  
49  
50 Our data also reveal an excess of deaths by misadventure in young adults in more recent  
51 years. Such deaths, often alcohol or drug-fuelled, are prominent among young Aboriginal  
52 adults nationwide, and are of grave concern.<sup>27,28</sup>

53  
54  
55  
56  
57  
58  
59  
60  
61  
62  
63  
64  
65  
66  
67  
68  
69  
70  
71  
72  
73  
74  
75  
76  
77  
78  
79  
80  
81  
82  
83  
84  
85  
86  
87  
88  
89  
90  
91  
92  
93  
94  
95  
96  
97  
98  
99  
100  
101  
102  
103  
104  
105  
106  
107  
108  
109  
110  
111  
112  
113  
114  
115  
116  
117  
118  
119  
120  
121  
122  
123  
124  
125  
126  
127  
128  
129  
130  
131  
132  
133  
134  
135  
136  
137  
138  
139  
140  
141  
142  
143  
144  
145  
146  
147  
148  
149  
150  
151  
152  
153  
154  
155  
156  
157  
158  
159  
160  
161  
162  
163  
164  
165  
166  
167  
168  
169  
170  
171  
172  
173  
174  
175  
176  
177  
178  
179  
180  
181  
182  
183  
184  
185  
186  
187  
188  
189  
190  
191  
192  
193  
194  
195  
196  
197  
198  
199  
200  
201  
202  
203  
204  
205  
206  
207  
208  
209  
210  
211  
212  
213  
214  
215  
216  
217  
218  
219  
220  
221  
222  
223  
224  
225  
226  
227  
228  
229  
230  
231  
232  
233  
234  
235  
236  
237  
238  
239  
240  
241  
242  
243  
244  
245  
246  
247  
248  
249  
250  
251  
252  
253  
254  
255  
256  
257  
258  
259  
260  
261  
262  
263  
264  
265  
266  
267  
268  
269  
270  
271  
272  
273  
274  
275  
276  
277  
278  
279  
280  
281  
282  
283  
284  
285  
286  
287  
288  
289  
290  
291  
292  
293  
294  
295  
296  
297  
298  
299  
300  
301  
302  
303  
304  
305  
306  
307  
308  
309  
310  
311  
312  
313  
314  
315  
316  
317  
318  
319  
320  
321  
322  
323  
324  
325  
326  
327  
328  
329  
330  
331  
332  
333  
334  
335  
336  
337  
338  
339  
340  
341  
342  
343  
344  
345  
346  
347  
348  
349  
350  
351  
352  
353  
354  
355  
356  
357  
358  
359  
360  
361  
362  
363  
364  
365  
366  
367  
368  
369  
370  
371  
372  
373  
374  
375  
376  
377  
378  
379  
380  
381  
382  
383  
384  
385  
386  
387  
388  
389  
390  
391  
392  
393  
394  
395  
396  
397  
398  
399  
400  
401  
402  
403  
404  
405  
406  
407  
408  
409  
410  
411  
412  
413  
414  
415  
416  
417  
418  
419  
420  
421  
422  
423  
424  
425  
426  
427  
428  
429  
430  
431  
432  
433  
434  
435  
436  
437  
438  
439  
440  
441  
442  
443  
444  
445  
446  
447  
448  
449  
450  
451  
452  
453  
454  
455  
456  
457  
458  
459  
460  
461  
462  
463  
464  
465  
466  
467  
468  
469  
470  
471  
472  
473  
474  
475  
476  
477  
478  
479  
480  
481  
482  
483  
484  
485  
486  
487  
488  
489  
490  
491  
492  
493  
494  
495  
496  
497  
498  
499  
500  
501  
502  
503  
504  
505  
506  
507  
508  
509  
510  
511  
512  
513  
514  
515  
516  
517  
518  
519  
520  
521  
522  
523  
524  
525  
526  
527  
528  
529  
530  
531  
532  
533  
534  
535  
536  
537  
538  
539  
540  
541  
542  
543  
544  
545  
546  
547  
548  
549  
550  
551  
552  
553  
554  
555  
556  
557  
558  
559  
560  
561  
562  
563  
564  
565  
566  
567  
568  
569  
570  
571  
572  
573  
574  
575  
576  
577  
578  
579  
580  
581  
582  
583  
584  
585  
586  
587  
588  
589  
590  
591  
592  
593  
594  
595  
596  
597  
598  
599  
600  
601  
602  
603  
604  
605  
606  
607  
608  
609  
610  
611  
612  
613  
614  
615  
616  
617  
618  
619  
620  
621  
622  
623  
624  
625  
626  
627  
628  
629  
630  
631  
632  
633  
634  
635  
636  
637  
638  
639  
640  
641  
642  
643  
644  
645  
646  
647  
648  
649  
650  
651  
652  
653  
654  
655  
656  
657  
658  
659  
660  
661  
662  
663  
664  
665  
666  
667  
668  
669  
670  
671  
672  
673  
674  
675  
676  
677  
678  
679  
680  
681  
682  
683  
684  
685  
686  
687  
688  
689  
690  
691  
692  
693  
694  
695  
696  
697  
698  
699  
700  
701  
702  
703  
704  
705  
706  
707  
708  
709  
710  
711  
712  
713  
714  
715  
716  
717  
718  
719  
720  
721  
722  
723  
724  
725  
726  
727  
728  
729  
730  
731  
732  
733  
734  
735  
736  
737  
738  
739  
740  
741  
742  
743  
744  
745  
746  
747  
748  
749  
750  
751  
752  
753  
754  
755  
756  
757  
758  
759  
760  
761  
762  
763  
764  
765  
766  
767  
768  
769  
770  
771  
772  
773  
774  
775  
776  
777  
778  
779  
780  
781  
782  
783  
784  
785  
786  
787  
788  
789  
790  
791  
792  
793  
794  
795  
796  
797  
798  
799  
800  
801  
802  
803  
804  
805  
806  
807  
808  
809  
810  
811  
812  
813  
814  
815  
816  
817  
818  
819  
820  
821  
822  
823  
824  
825  
826  
827  
828  
829  
830  
831  
832  
833  
834  
835  
836  
837  
838  
839  
840  
841  
842  
843  
844  
845  
846  
847  
848  
849  
850  
851  
852  
853  
854  
855  
856  
857  
858  
859  
860  
861  
862  
863  
864  
865  
866  
867  
868  
869  
870  
871  
872  
873  
874  
875  
876  
877  
878  
879  
880  
881  
882  
883  
884  
885  
886  
887  
888  
889  
890  
891  
892  
893  
894  
895  
896  
897  
898  
899  
900  
901  
902  
903  
904  
905  
906  
907  
908  
909  
910  
911  
912  
913  
914  
915  
916  
917  
918  
919  
920  
921  
922  
923  
924  
925  
926  
927  
928  
929  
930  
931  
932  
933  
934  
935  
936  
937  
938  
939  
940  
941  
942  
943  
944  
945  
946  
947  
948  
949  
950  
951  
952  
953  
954  
955  
956  
957  
958  
959  
960  
961  
962  
963  
964  
965  
966  
967  
968  
969  
970  
971  
972  
973  
974  
975  
976  
977  
978  
979  
980  
981  
982  
983  
984  
985  
986  
987  
988  
989  
990  
991  
992  
993  
994  
995  
996  
997  
998  
999  
1000

1  
2  
3 deaths, as well as the subsequent fall in deaths, have probably been understated.  
4 Moreover, from 1985 to 2009, the government agencies recorded 18% fewer deaths for the  
5 Tiwi community than we have recorded, with under-identification varying from 10 to 30%  
6 over five consecutive 5 years intervals (In an email from Y Zhao, ([yuejen.zhao@nt.gov.au](mailto:yuejen.zhao@nt.gov.au))  
7 2016 Oct 24). An additional limitation is assignment of a single category of cause of death,  
8 whereas natural deaths in adults have multiple causes and associated conditions; the  
9 coexistence of cardiovascular risk and lung disease, and of renal disease with cardiovascular  
10 disease are well recognised. However, the use of a single underlying cause of death is  
11 dictated by the detail of the source data. It is also the approach employed until recently for  
12 the mortality component of the study of Global Burden of Disease.  
13  
14  
15  
16  
17

18 Is it credible that about half the deaths in Tiwi people in the 1960s were in subjects less than  
19 15 years of age? The World Health Organization estimated that, in 1955, fully 40% of global  
20 deaths were in children age <5 years, so presumably an even greater proportion were  
21 deaths of people <15 year old).<sup>29</sup> Furthermore, analyses of skeletal remains of some  
22 premodern cultures have suggested that up to 68% of deaths occurred people <15 years old  
23 (Chamberlain cited in Roser, 2006).<sup>1,30</sup> Hart's comment that, around 1928, five of 15  
24 bestowed wives (females promised in marriage to specific Tiwi community members), died  
25 before puberty, supports a high childhood mortality.<sup>3</sup>  
26  
27  
28  
29

30 Other Aboriginal groups in remote areas of Australia over the same intervals have  
31 undoubtedly experienced similar transitions. NT government agencies have described  
32 similar trends in early life mortality since 1967, and improvements in natural death rates  
33 overall since the late 1980s (Figures 6 and 7).<sup>31</sup> In the Shire of Broome, Western Australia,  
34 Gracey et al. described excessive levels of Aboriginal infant and childhood infection and  
35 under-nutrition in the 1970s and 1980s and increasing deaths by misadventure in young  
36 Aboriginal adults between 1971 and 1994.<sup>32</sup> Our findings are also consistent with events in  
37 many other countries and regions. Figure 8 shows the fall in early life mortality since 1960,  
38 which is most dramatic in disadvantaged populations like Yemen, Afghanistan, Bangladesh  
39 and Nepal,<sup>33</sup> while Figure 9 shows the simultaneous increase in life expectancy at birth,  
40 again most marked in disadvantaged settings.<sup>34</sup> Our Tiwi data show that the improvement in  
41 life expectancy is a function of reduced early life mortality as well as increasing adult  
42 longevity.  
43  
44  
45  
46  
47

48 Gratifying as these reductions in adult death rates are, further improvements can still be  
49 anticipated. Birthweights continue to increase, so that accentuated chronic disease risk  
50 from that source should decline. In addition adult health services continue to improve,  
51 especially in prevention, screening and management of chronic disease,<sup>8</sup> and rates of  
52 smoking are falling.<sup>35</sup> Current challenges in all of remote Aboriginal Australia, however,  
53 include high rates of obesity,<sup>36</sup> poor diet, especially sugar excess,<sup>37</sup> drug use, alcohol abuse,  
54  
55  
56  
57  
58  
59  
60

1  
2  
3 and foetal alcohol syndrome,<sup>7</sup> and rates of interpersonal violence, as well as of suicide and  
4 accidents, remain high.  
5

6  
7 These changes described in the manuscript are especially welcome news for the Tiwi  
8 Aboriginal people, whose mortality rates have been the worst in Australia,<sup>11</sup> and for remote-  
9 living Aboriginal people more broadly. They represent triumphs of inter-sectoral  
10 improvements, public health policy and health care more broadly, which are to be  
11 celebrated. Health care providers and policy makers should be comforted to see such large  
12 scale progress demonstrated through an historical perspective, and encouraged in their  
13 resolve for ongoing improvements in preventative health care.<sup>8</sup> Better education, skills  
14 training, employment opportunities, empowerment and socioeconomic status must also be  
15 unflaggingly supported. More broadly, this information should moderate the negative  
16 discourse which has pervaded the Aboriginal health literature.  
17  
18  
19  
20  
21  
22  
23  
24  
25  
26  
27  
28  
29  
30  
31  
32  
33  
34  
35  
36  
37  
38  
39  
40  
41  
42  
43  
44  
45  
46  
47  
48  
49  
50  
51  
52  
53  
54  
55  
56  
57  
58  
59  
60

1  
2  
3 Acknowledgements: We are very grateful to Tiwi Land Council and the Tiwi people for their  
4 continuing support of this research. We specifically acknowledge the expertise and  
5 dedication of the sisters of the order of Our Lady of the Sacred Heart (OLSH) who  
6 maintained fastidious clinical records which now underlie much of this report. We are  
7 grateful to the clinic staff in the communities of Wurrumiyanga (previously known as Ngiuu)  
8 on Bathurst Island, and of Milikapiti and Pirlangimpi on Melville Island. We thank the  
9 Catholic Diocese of Darwin for allowing access to the medical records, and supplying records  
10 of deaths and burial recorded by the parish. We thank NT Renal Services for supplying  
11 records of Tiwi people who started dialysis. We thank Centre of Chronic Disease staff for  
12 their contribution to data management and analyses throughout the course of this and  
13 related projects.  
14  
15  
16  
17  
18  
19  
20  
21  
22  
23  
24  
25  
26  
27  
28  
29  
30  
31  
32  
33  
34  
35  
36  
37  
38  
39  
40  
41  
42  
43  
44  
45  
46  
47  
48  
49  
50  
51  
52  
53  
54  
55  
56  
57  
58  
59  
60

## References

1. Roser M. Population: Life Expectancy. Child Mortality. [cited 2016 Aug 18]. Available from: <http://ourworldindata.org/>
2. Lorenzo R, Naghavi M, Foreman K, Lim S, Shibuya K, Aboyans V et al., Global and regional mortality from 235 causes of death for 20 age groups in 1990 and 2010: a systematic analysis for the Global Burden of Disease Study 2010. *The Lancet* 2012;380(9858):2095–2128.
3. Hart CWM, Pilling AR, Goodale JC. *The Tiwi of North Australia*. New York: Holt, Rinehart and Winston; 1988.
4. National Archives of Australia. Bishop Francis Xavier Gsell MSC-Fact sheet 151. National Archives of Australia: 2016 [cited 2016, July 7]. Available from: <http://www.naa.gov.au/collection/fact-sheets/fs151.aspx>
5. Commonwealth of Australia. Handbook of the 44th Parliament (2014) "Part 5 - Referendums and Plebiscites - Referendum results". Parliamentary Library of Australia. [cited 2016 Dec 26 ]. Available from: [http://parlinfo.aph.gov.au/parlInfo/download/handbook/newhandbook/2014-10-31/toc\\_pdf\\_repeat/Part%205%20-%20Referendums%20and%20Plebiscites.pdf;fileType=application%2Fpdf](http://parlinfo.aph.gov.au/parlInfo/download/handbook/newhandbook/2014-10-31/toc_pdf_repeat/Part%205%20-%20Referendums%20and%20Plebiscites.pdf;fileType=application%2Fpdf)
6. Kettle E. *Health Services in the Northern Territory – a history 1824-1970. Volume 2*. Australian National University. North Australia Research unit, Darwin; 1991. [cited 2016 Aug 18]. Available from: <https://digitalcollections.anu.edu.au/handle/1885/46992>
7. Hargrave, John C. *The best of both worlds: Aboriginal health then and now*. The Seventh Eric Johnston Lecture, 1992. Occasional papers; no. 36. State Library of the Northern Territory, Darwin; 1993 [cited 2016 Aug 18]. Available from: [https://www.nt.gov.au/\\_\\_data/assets/pdf\\_file/0008/241892/occpaper36.pdf](https://www.nt.gov.au/__data/assets/pdf_file/0008/241892/occpaper36.pdf)
8. Hoy WE. Chronic disease care in remote Aboriginal Australia has been transformed. *Personal View, BMJ* 2013; 347:f6127. doi: <http://dx.doi.org/10.1136/bmj.f6127>
9. Hargrave J. *Medical survey of the Bathurst Island Mission. March-May 1957. Report to the NT Department of health, 1957*. Darwin: Australian Archives, 1957.
10. Commonwealth of Australia. *The Northern Territory Report: 1953-1955*.



- 1  
2  
3 Commonwealth Government, Canberra; 1956 [cited 2016 Aug 23]. Available from:  
4 [http://aiatsis.gov.au/sites/default/files/catalogue\\_resources/59270.pdf](http://aiatsis.gov.au/sites/default/files/catalogue_resources/59270.pdf)  
5  
6  
7 11. Jain SK, editor. Trends in mortality by causes of death in Australia, the States and  
8 Territories during 1971-1992, and in statistical subdivisions during 1991-1992. Cat. No.  
9 3313.0. National Centre for Epidemiology and Population Health and Australian Bureau  
10 of Statistics, Canberra, 1994 [cited 2016 Aug 18]. Available from:  
11 [http://www.ausstats.abs.gov.au/ausstats/free.nsf/0/8C850BD253D26CE3CA25722500](http://www.ausstats.abs.gov.au/ausstats/free.nsf/0/8C850BD253D26CE3CA25722500049511/$File/33130_1971-92.pdf)  
12 [049511/\\$File/33130\\_1971-92.pdf](http://www.ausstats.abs.gov.au/ausstats/free.nsf/0/8C850BD253D26CE3CA25722500049511/$File/33130_1971-92.pdf)  
13  
14  
15  
16  
17 12. Spencer JS, Silva D, Snelling P, Hoy WE. An epidemic of renal failure among Australian  
18 Aborigines. *Med J Aust* 168:537–541, 1998.  
19  
20 13. Australian Indigenous Health *InfoNet*. Chronic conditions: Review of kidney disease  
21 among Indigenous people. Last update Sept 2015. [cited 2016 Sep 01]. Available from:  
22 <http://www.healthinfonet.ecu.edu.au/chronic-conditions>.  
23  
24  
25  
26 14. Hoy WE, Mott SA, McDonald, S. An expanded nationwide view of chronic kidney  
27 disease in Aboriginal Australians. *Nephrology (Carlton)*. 2016 Apr 14. doi:  
28 10.1111/nep.12798. [Epub ahead of print].  
29  
30  
31  
32 15. Hoy WE, Nicol JL. Birthweight and natural deaths in a remote Australian Aboriginal  
33 community. *Med J Aust*. 2010; 192(1): 14-19.  
34  
35  
36 16. Hoy WE, Nicol JL. The Barker hypothesis confirmed: Association of low birthweight and  
37 all- cause natural deaths in adults in a remote Australian Aboriginal community.  
38 Submitted to *J Dev Orig Health Dis.*, May 2017.  
39  
40  
41 17. Australian Bureau of Statistics. Historical Reference and Information. ABS,  
42 Commonwealth of Australia, 11 Sept 2013 [cited 2016 Sep 11]. Available from:  
43 [http://www.abs.gov.au/websitedbs/censushome.nsf/home/historicalinformation?ope](http://www.abs.gov.au/websitedbs/censushome.nsf/home/historicalinformation?opendocument&navpos=320)  
44 [ndocument&navpos=320](http://www.abs.gov.au/websitedbs/censushome.nsf/home/historicalinformation?opendocument&navpos=320)  
45  
46  
47  
48  
49 18. Peterson N, Taylor J. Demographic transition in a hunter-gatherer population the Tiwi  
50 case, 1929-1996. *Australian Aboriginal Studies* 1998;1:11-27.  
51  
52  
53 19. Barker DJP, Osmond C, Golding J, et al. Growth in utero, blood pressure in childhood  
54 and adult life, and mortality from cardiovascular disease. *Br Med J* 1998;298:564–7.  
55  
56 20. Hoy WE, Rees M, Kile E, Mathews JD, Pugsley DJ, Wang Z. Low birth weight and renal  
57 disease in Australian Aborigines. *The Lancet* 352:1826–1827, 1998.  
58  
59  
60

- 1  
2  
3 21. Singh GR, Hoy WE. The association between birth weight and current blood pressure: a  
4 cross-sectional study in an Australian Aboriginal community. *Med J Aust*, 179:532–535,  
5 2003.  
6  
7  
8 22. Grams ME, Coresh J, Segev DL, Kucirka LM, Tighiouart H, Samak MJ. Vascular Disease,  
9 ESRD, and Death: Interpreting Competing Risk Analyses. *Clin J Am Soc Nephrol*. 2012  
10 Oct 5; 7(10): 1606–1614. Published online 2012 Aug 2. doi: [10.2215/CJN.03460412](https://doi.org/10.2215/CJN.03460412)  
11  
12  
13 23. Hoy WE, Kincaid-Smith P, Hughson MD, Fogo A, Sinniah R, Dowling J, Samuel T, Mott  
14 SA, Douglas-Denton R, Bertram JF. Invited Review for World Kidney Forum, CKD in  
15 Aboriginal Australians. *American Journal of Kidney Diseases*, 56(5):983-993.2010.  
16  
17 24. Hoy WE, Kondalsamy Chennakes S, McDonald S P, Cass, A.,Singh G R., Bertram J F,  
18 Hughson M D, Chronic kidney disease in Aboriginal Australians. In: El Nahas M (Ed.),  
19 *Kidney Disease in Ethnic Minorities and the Developing World*. New York, U.S: Taylor &  
20 Francis;2005:305-333.  
21  
22  
23 25. Australian Institute of Health and Welfare. Assessment of the coding of ESKD in deaths  
24 and hospitalisation data. A working paper using linked hospitalisation and deaths data  
25 from Western Australia and New South Wales. Cat. no. PHE 182. Canberra: AIHW;  
26 2014.  
27  
28 26. You J, Hoy WE, Zhao Y, Beaver C, Eager K. End-stage renal disease in the Northern  
29 Territory: current and future treatment costs. *Med J Aust* 176(10):461–465, 2002.  
30  
31  
32 27. Australian Bureau of Statistics. Leading causes of Aboriginal and Torres Strait Islander  
33 deaths. 3303.0 Causes of Death, Australia, 2013. Commonwealth of Australia, 2015.  
34 [cited 2016 Jan 01]. Available from:  
35 [http://www.abs.gov.au/ausstats/abs@.nsf/Lookup/by%20Subject/3303.0~2013~Main](http://www.abs.gov.au/ausstats/abs@.nsf/Lookup/by%20Subject/3303.0~2013~Main%20Features~Leading%20Causes%20of%20Aboriginal%20and%20Torres%20Strait%20Islander%20Deaths~10015)  
36 [%20Features~Leading%20Causes%20of%20Aboriginal%20and%20Torres%20Strait%20Islander%20Deaths~10015](http://www.abs.gov.au/ausstats/abs@.nsf/Lookup/by%20Subject/3303.0~2013~Main%20Features~Leading%20Causes%20of%20Aboriginal%20and%20Torres%20Strait%20Islander%20Deaths~10015)  
37  
38  
39 28. Australian Indigenous Health/InfoNet (2016) Summary of Aboriginal and Torres Strait  
40 Islander health, 2015. [cited 2016 Jan 01]. Available from:  
41 from <http://www.healthinonet.ecu.edu.au/health-facts/summary>  
42  
43  
44 29. World Health Organization. 50 Facts: Global health situation and trends 1955-2025.  
45 World Health Report; 2016 [cited 2016 Aug 23]. Available from:  
46  
47  
48  
49  
50  
51  
52  
53  
54  
55  
56  
57  
58  
59  
60

- 1  
2  
3 [http://www.who.int/whr/1998/media\\_centre/50facts/en/](http://www.who.int/whr/1998/media_centre/50facts/en/)  
4  
5 30. Hill K. The decline of childhood mortality. John Hopkins University;1990 [cited 2016  
6 Aug 23]. Available from: <https://jscholarship.library.jhu.edu/handle/1774.2/936>  
7  
8 31. Northern Territory Department of Health. Mortality in the Northern Territory 1967-  
9 2006. Factsheet. 2011 [cited 2016, August 26]. Available from:  
10 <http://hdl.handle.net/10137/480>  
11  
12 32. Gracey M, Spargo RM. Deaths in Broome, Western Australia, 1883 to 1994. Aust N Z J  
13 Public Health, 1996; 20: 505-511.  
14  
15 33. UNICEF Global Database. Child Mortality Estimates: country-specific under-five  
16 mortality rate. UNICEF, 2015. [cited 2016 Aug 23]. Available from:  
17 <http://data.unicef.org/child-mortality/under-five.html>  
18  
19 34. The World Bank. Life expectancy at birth, total (years). World development indicators.  
20 World Bank Group IBRD IDA, 2016. [cited 2016 Aug 23]. Available from:  
21 <http://data.worldbank.org/indicator/SP.DYN.LE00.IN> Ditto  
22  
23 35. Australian Bureau of Statistics, National Aboriginal and Torres Strait Islander Social  
24 Survey, 2014-15. Cat no. 4714.0. ABS; 2016 [cited 2016 Aug 23]. Available  
25 from: [http://www.abs.gov.au/ausstats/abs@.nsf/Lookup/4714.0main+features12201](http://www.abs.gov.au/ausstats/abs@.nsf/Lookup/4714.0main+features122014-15)  
26 4-15  
27  
28 36. Australian Bureau of Statistics. Australian Aboriginal and Torres Strait Islander Health  
29 Survey: Updated results, 2012-2013. Cat no. 4727.0.55.006; 2014 [cited 2016 Aug 23].  
30 Available from:  
31 [http://www.abs.gov.au/ausstats/abs@.nsf/Lookup/by%20Subject/4727.0.55.006~201](http://www.abs.gov.au/ausstats/abs@.nsf/Lookup/by%20Subject/4727.0.55.006~2012%E2%80%9313~Main%20Features~Overweight%20and%20obesity~12)  
32 [2%E2%80%9313~Main%20Features~Overweight%20and%20obesity~12](http://www.abs.gov.au/ausstats/abs@.nsf/Lookup/by%20Subject/4727.0.55.006~2012%E2%80%9313~Main%20Features~Overweight%20and%20obesity~12).  
33  
34 37. Hoy WE, Manning RW, Tungatalum L, Hoy PW, Mott SA, Eddy D, Ball PA. A profile of  
35 sales audits of a remote Aboriginal community's general store: 1992 and 2011.  
36 ANZJPH, Letter, 38(1):94. 4 Feb 2014:  
37  
38  
39  
40  
41  
42  
43  
44  
45  
46  
47  
48  
49  
50  
51  
52  
53  
54  
55  
56  
57  
58  
59  
60

1  
2  
3 Contributors: WH conceived and designed this work, collected data, directed data analyses,  
4 interpreted the findings and wrote the manuscript. BMcL conducted field work, and  
5 performed data collection and data preparation. SM prepared data, performed analyses and  
6 contributed to interpretation, produced figures and tables, and coordinated preparation  
7 and editing of the manuscript. All authors had full access to all of the data in the study and  
8 can take responsibility for the integrity of the data and the accuracy of the data analysis. All  
9 authors reviewed, revised and approved the manuscript.  
10  
11  
12

13  
14 Funding: This work has been supported by past grants from the National Health and Medical  
15 Research Council of Australia (NHMRC); #511081, #921134, #951250 and #951342, and  
16 from the Colonial Foundation of Australia. It is currently supported by the NHMRC Centre of  
17 Research Excellence in Chronic Kidney Disease in Australia; # 1079502. Past grants have  
18 specifically supported patient recruitment, data collection and data management of a  
19 broader study within which this study is embedded. Current support has enabled analyses  
20 and preparation of this manuscript. The funders had no role in preparation or conduct of  
21 the study or writing or submission of the manuscript.  
22  
23  
24

25  
26 Competing interests: All authors have completed the ICMJE uniform disclosure form  
27 at [www.icmje.org/coi\\_disclosure.pdf](http://www.icmje.org/coi_disclosure.pdf) and declare: authors had financial support from  
28 National Health & Medical Research Council of Australia (Centre for Research Excellence in  
29 Chronic Kidney Disease, APP1079502 and or Australia Fellowship, APP511081) for the  
30 submitted work; no financial relationships with any organisations that might have an  
31 interest in the submitted work in the previous three years; no other relationships or  
32 activities that could appear to have influenced the submitted work.  
33  
34  
35

36  
37 Transparency: The lead author affirms that the manuscript is an honest, accurate, and  
38 transparent account of the study being reported; that no important aspects of the study  
39 have been omitted; and that any discrepancies from the study as planned have been  
40 explained.  
41

42  
43 Ethical approval: Human Research Ethics Committee of the Northern Territory Department  
44 of health and Community Services and Menzies School of Health Research (91/20, 94/02  
45 and 03/51); The University of Queensland (2004000028).  
46

47 Provenance and peer review: Not commissioned; externally peer reviewed.  
48

49  
50 Data sharing statement: Grouped, de-identified data can be requested from the Corresponding  
51 Author, Wendy E Hoy ([w.hoy@uq.edu.au](mailto:w.hoy@uq.edu.au)).  
52  
53  
54  
55  
56  
57  
58  
59  
60

Table 1. Mean (95%CI) natural death rate per 100,000 population by five-year intervals and age-group

| Time interval | <15 years        | 15-44 years      | 45+ years           | All ages           |
|---------------|------------------|------------------|---------------------|--------------------|
| 1986-1990     | 547.4 (406, 689) | 426.3 (240, 613) | 8065.4 (6778, 9353) | 1480.7 (1240,1721) |
| 2006-2010     | 60.5 (0, 202)    | 326.3 (140, 513) | 2815.2 (1528, 4103) | 716.8 (476,957)    |

Note: The mean of aggregate natural deaths over years 2001-2010 is used for deaths of those <15 years of age.

Sources: 1986-2011 census data, Australian Bureau of Statistics (Catalogues: 1987, #2460.0; 2012,#2002.0).<sup>17</sup>

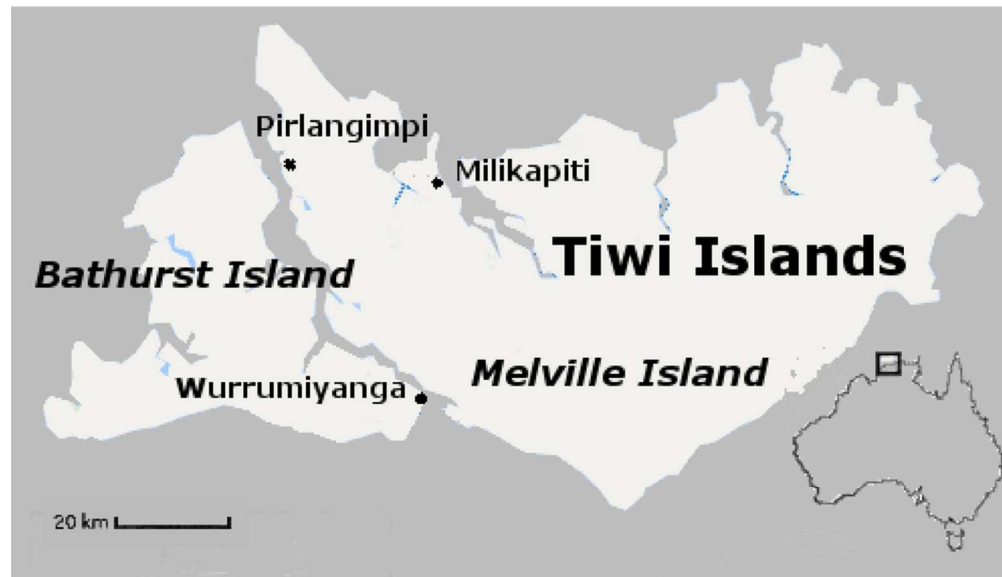

Figure 1. The Tiwi Islands, Northern Territory, Australia

Note: Wurrumiyanga was formerly named Nguui.

Source: Adapted from Google Map data. The Tiwi Islands. Google; ©2017 [cited 2017 Jan 10]. Available from: <https://www.google.com.au/maps/@-12.2087082,130.7314414,8.75z>

100x58mm (300 x 300 DPI)

1  
2  
3  
4  
5  
6  
7  
8  
9  
10  
11  
12  
13  
14  
15  
16  
17  
18  
19  
20  
21  
22  
23  
24  
25  
26  
27  
28  
29  
30  
31  
32  
33  
34  
35  
36  
37  
38  
39  
40  
41  
42  
43  
44  
45  
46  
47  
48  
49  
50  
51  
52  
53  
54  
55  
56  
57  
58  
59  
60

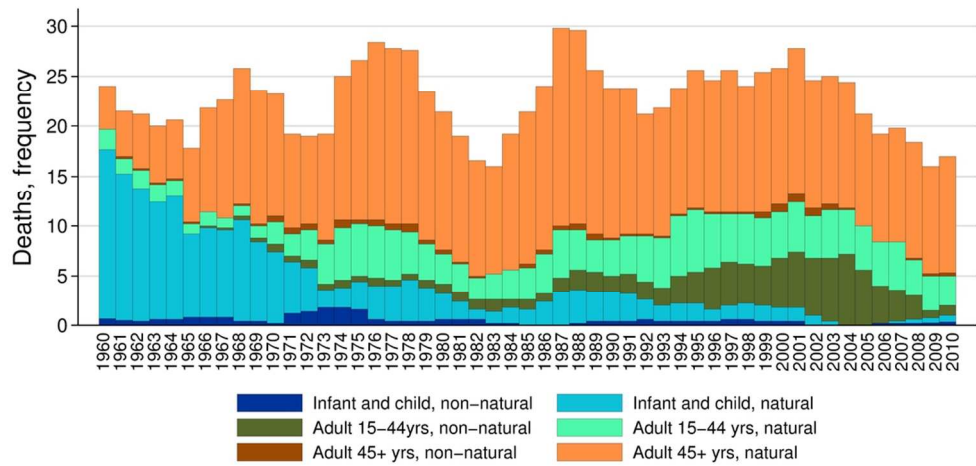

Figure 2. Numbers of Tiwi deaths by age-group and broad cause of death, 1960-2010  
 Note: A five-year rolling average of frequencies is presented; people who have started dialysis are included among natural deaths.

101x50mm (300 x 300 DPI)



Figure 3. Numbers of Tiwi natural adult deaths by age-group and cause of death, 1960-2010  
 Note: A five-year rolling average of frequencies is presented; people who have started dialysis are included among renal deaths.

101x50mm (300 x 300 DPI)

Review only



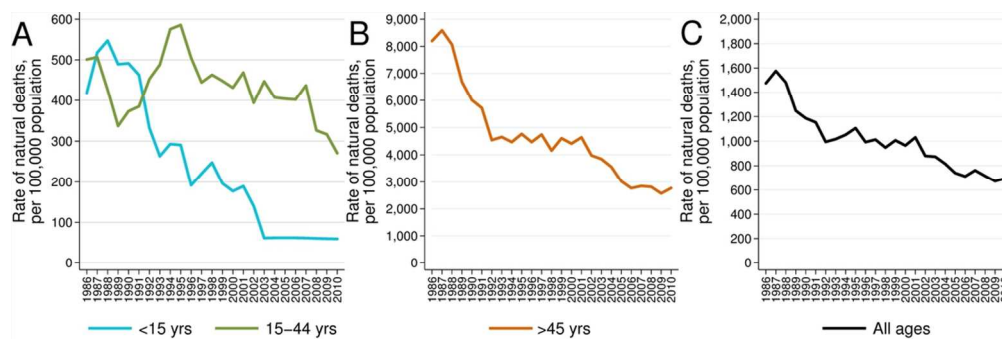

Figures 4 A-C. Tiwi rates of natural death per 100,000 population by age-group, 1986-2010

Note: The figure presents a five-year rolling average of natural death rates by age-group: <15 and 15-45 years (A);  $\geq 45$  years (B); all ages (C). People who started dialysis are included among natural deaths. The low rates of death depicted for those <15 years from 2003 to 2010 are each based upon the average of the very small number of events (four) that occurred between 2001 and 2010.

Sources of 1986-2010 population data: quinquennial Census estimates (Australian Bureau of Statistics Catalogues: 1987, #2460.0; 1993, #2730.7; 2000, #70609; 2007, #2001.0; 2002, #2002.0; 2012, #2002.0);17

101x33mm (300 x 300 DPI)

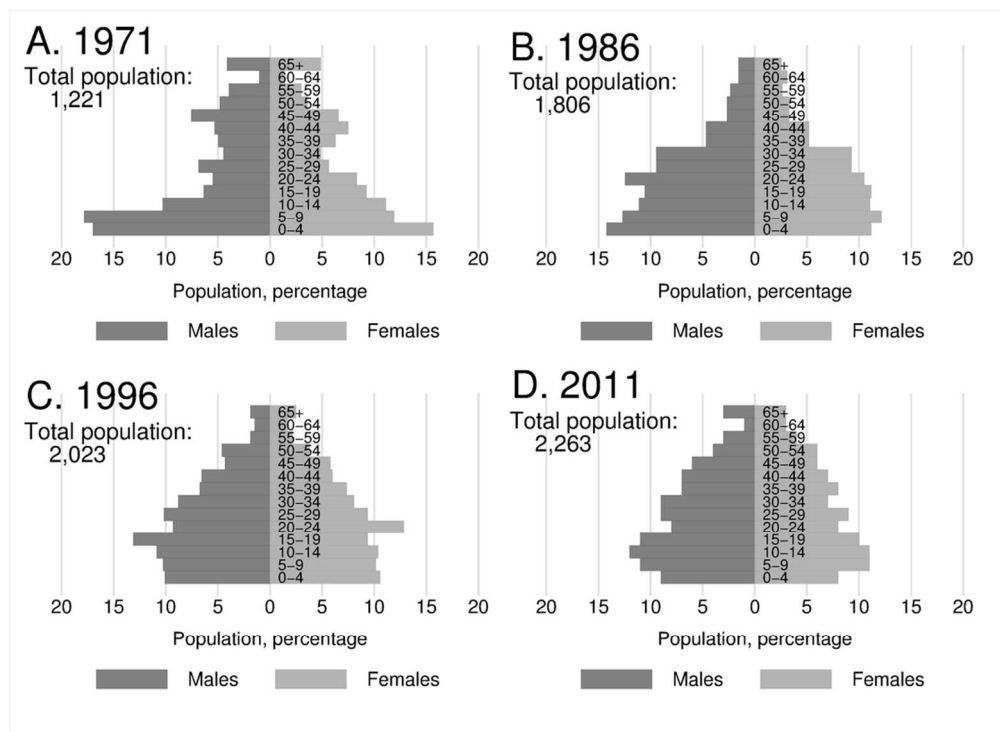

Figures 5 A-D. Age distribution of the Tiwi population at four time-points, by sex, 1971-2011  
 Note: The figure presents population pyramids and total population for 1971 (A); 1986 (B); 1996 (C); 2011 (D).

Sources: A, cited in Peterson, 1988;18 B-D, census data, Australian Bureau of Statistics (Catalogues: 1987, #2460.0; 2000, #70609; 2012,#2002.0).17

101x73mm (300 x 300 DPI)

only

1  
2  
3  
4  
5  
6  
7  
8  
9  
10  
11  
12  
13  
14  
15  
16  
17  
18  
19  
20  
21  
22  
23  
24  
25  
26  
27  
28  
29  
30  
31  
32  
33  
34  
35  
36  
37  
38  
39  
40  
41  
42  
43  
44  
45  
46  
47  
48  
49  
50  
51  
52  
53  
54  
55  
56  
57  
58  
59  
60

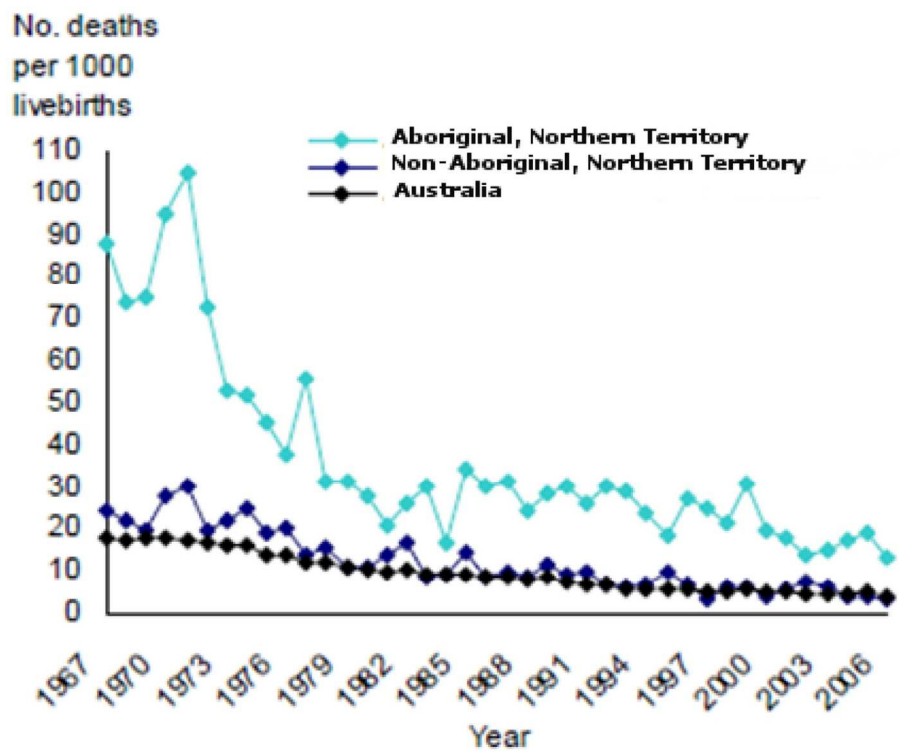

Figure 6. Infant mortality, Northern Territory and Australia, 1967-2007  
Source: Northern Territory Department of Health, 2011.31

131x103mm (300 x 300 DPI)

only

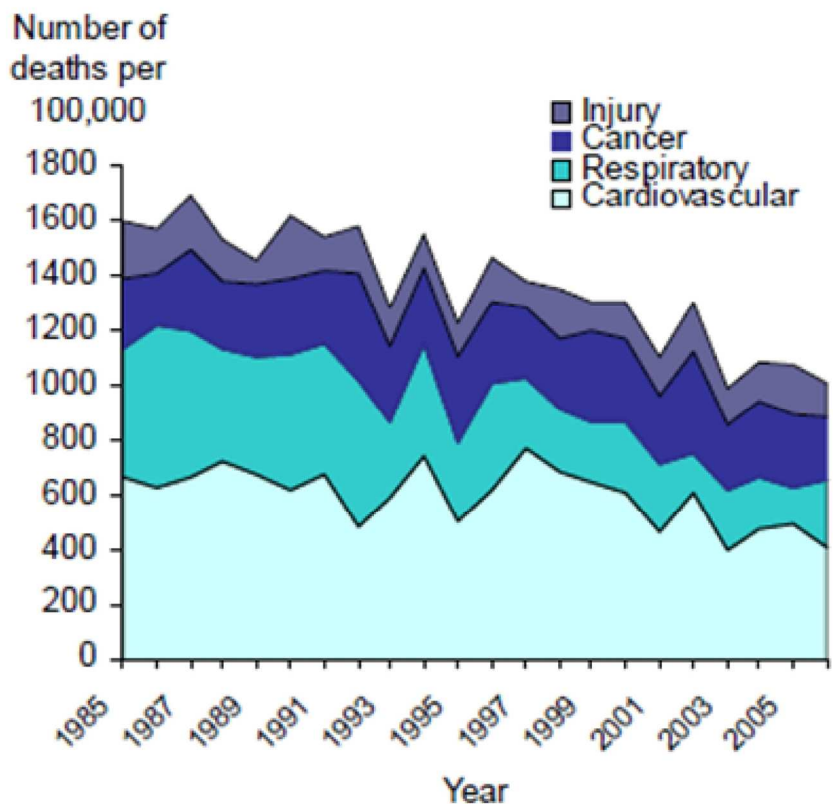

Figure 7. Leading causes of death in the Aboriginal population of the Northern Territory: 1985-2006  
 Source: Northern Territory Department of Health, 2011.31

137x112mm (300 x 300 DPI)

only

1  
2  
3  
4  
5  
6  
7  
8  
9  
10  
11  
12  
13  
14  
15  
16  
17  
18  
19  
20  
21  
22  
23  
24  
25  
26  
27  
28  
29  
30  
31  
32  
33  
34  
35  
36  
37  
38  
39  
40  
41  
42  
43  
44  
45  
46  
47  
48  
49  
50  
51  
52  
53  
54  
55  
56  
57  
58  
59  
60

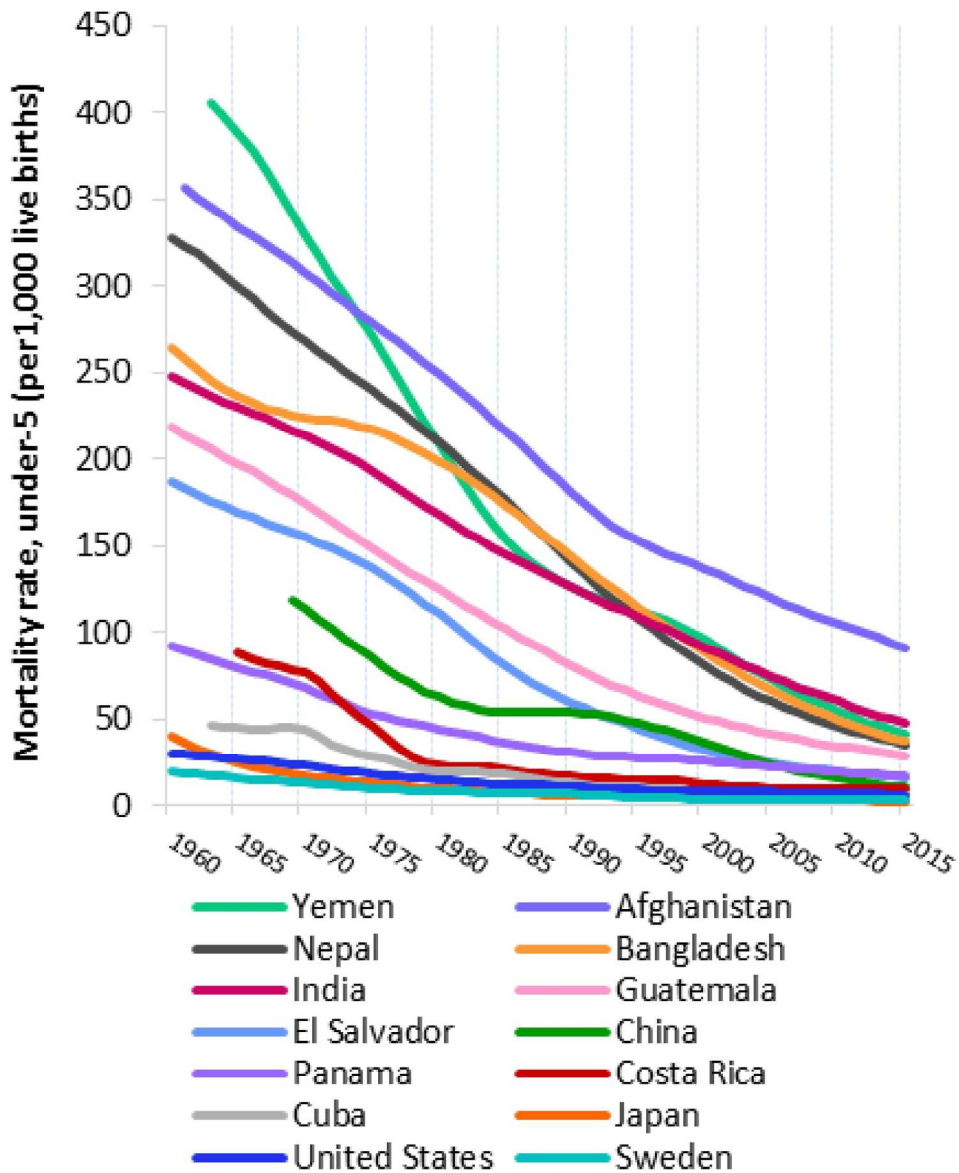

Figure 8. Under-five mortality rates for selected countries, 1960-2015  
Source: adapted from UNICEF Global Database, 2015.33

189x223mm (300 x 300 DPI)

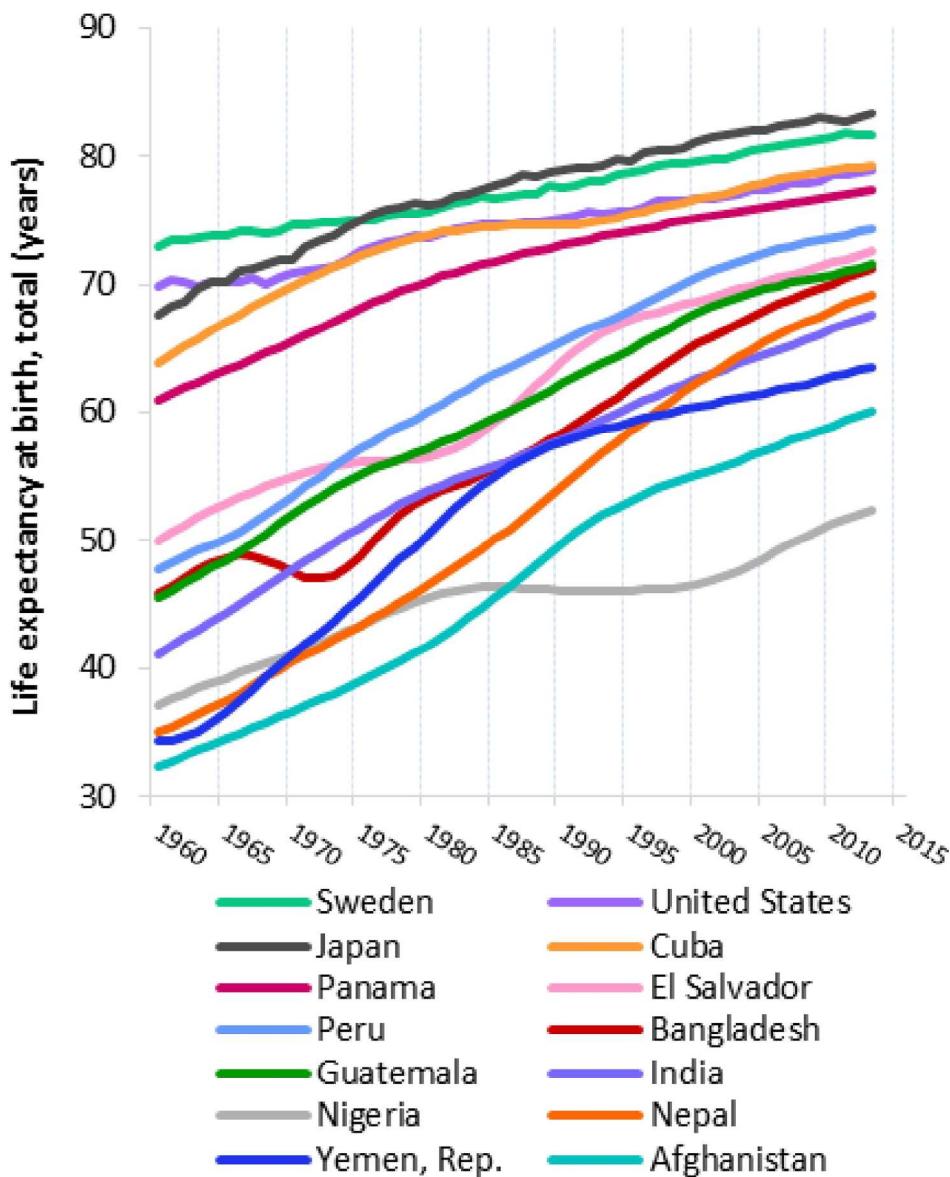

Figure 9. Life expectancy at birth for selected countries, 1960-2013

Source: adapted from The World Bank, 2016.<sup>34</sup>

Source notes: Derived from male and female life expectancy at birth from sources such as: United Nations Population Division; World Population Prospects; United Nations Statistical Division. Population and Vital Statistics Report (various years); Census reports and other statistical publications from national statistical offices; Eurostat: Demographic Statistics; Secretariat of the Pacific Community: Statistics and Demography Programme; and U.S. Census Bureau: International Database.

189x223mm (300 x 300 DPI)

1  
2  
3  
4  
5  
6  
7  
8  
9  
10  
11  
12  
13  
14  
15  
16  
17  
18  
19  
20  
21  
22  
23  
24  
25  
26  
27  
28  
29  
30  
31  
32  
33  
34  
35  
36  
37  
38  
39  
40  
41  
42  
43  
44  
45  
46  
47

**Supplementary Table 1. Frequencies of Tiwi deaths by age-group and time interval, 1960-2010**

| Age-group         | Deaths N (%), by time interval |                  |                 |                  |                 |                  |                  |                  |                  |                 |                 |                    |
|-------------------|--------------------------------|------------------|-----------------|------------------|-----------------|------------------|------------------|------------------|------------------|-----------------|-----------------|--------------------|
|                   | 1960-1964                      | 1965-1969        | 1970-1974       | 1975-1979        | 1980-1984       | 1985-1989        | 1990-1994        | 1995-1999        | 2000-2004        | 2005-2009       | 2010            | Total              |
| Under 15 years    | 69 (65.1)                      | 48 (42.9)        | 29 (30.5)       | 20 (14.4)        | 8 (9.6)         | 17 (11.4)        | 13 (12.3)        | 10 (7.8)         | 5 (4.1)          | 2 (2.0)         | 1 (6.3)         | 222 (19.2)         |
| 15 - <45 years    | 9 (8.5)                        | 6 (5.4)          | 19 (20.0)       | 28 (20.1)        | 16 (19.3)       | 31 (20.8)        | 32 (30.2)        | 46 (35.9)        | 50 (40.7)        | 40 (40.4)       | 2 (12.5)        | 279 (24.1)         |
| 45 years and over | 28 (26.4)                      | 58 (51.8)        | 47 (49.5)       | 91 (65.5)        | 59 (71.1)       | 101 (67.8)       | 61 (57.6)        | 72 (56.3)        | 68 (55.3)        | 57 (57.6)       | 13 (81.3)       | 655 (56.7)         |
| <b>Total</b>      | <b>106 (100)</b>               | <b>112 (100)</b> | <b>95 (100)</b> | <b>139 (100)</b> | <b>83 (100)</b> | <b>149 (100)</b> | <b>106 (100)</b> | <b>128 (100)</b> | <b>123 (100)</b> | <b>99 (100)</b> | <b>16 (100)</b> | <b>1,156 (100)</b> |

Note: 5-yearly time intervals are presented except for the single year of 2010; people who started dialysis are included among deaths

Peer review only

## STROBE Statement—checklist of items that should be included in reports of observational studies

|                           | Item No | Recommendation                                                                                                                                                                                                                                                                                                                                                                                                                                                                                        | Page No.(s) [Paragraph No.(s)] |
|---------------------------|---------|-------------------------------------------------------------------------------------------------------------------------------------------------------------------------------------------------------------------------------------------------------------------------------------------------------------------------------------------------------------------------------------------------------------------------------------------------------------------------------------------------------|--------------------------------|
| <b>Title and abstract</b> | 1       | (a) Indicate the study's design with a commonly used term in the title or the abstract                                                                                                                                                                                                                                                                                                                                                                                                                | 1                              |
|                           |         | (b) Provide in the abstract an informative and balanced summary of what was done and what was found                                                                                                                                                                                                                                                                                                                                                                                                   | 2                              |
| <b>Introduction</b>       |         |                                                                                                                                                                                                                                                                                                                                                                                                                                                                                                       |                                |
| Background/rationale      | 2       | Explain the scientific background and rationale for the investigation being reported                                                                                                                                                                                                                                                                                                                                                                                                                  | 3[1-9]                         |
| Objectives                | 3       | State specific objectives, including any prespecified hypotheses                                                                                                                                                                                                                                                                                                                                                                                                                                      | 3[1]                           |
| <b>Methods</b>            |         |                                                                                                                                                                                                                                                                                                                                                                                                                                                                                                       |                                |
| Study design              | 4       | Present key elements of study design early in the paper                                                                                                                                                                                                                                                                                                                                                                                                                                               | 4[6]-5[5]                      |
| Setting                   | 5       | Describe the setting, locations, and relevant dates, including periods of recruitment, exposure, follow-up, and data collection                                                                                                                                                                                                                                                                                                                                                                       | 4[6]-5[5]                      |
| Participants              | 6       | (a) <i>Cohort study</i> —Give the eligibility criteria, and the sources and methods of selection of participants. Describe methods of follow-up<br><i>Case-control study</i> —Give the eligibility criteria, and the sources and methods of case ascertainment and control selection. Give the rationale for the choice of cases and controls<br><i>Cross-sectional study</i> —Give the eligibility criteria, and the sources and methods of selection of participants                                | 4[4] 5[5]                      |
|                           |         | (b) <i>Cohort study</i> —For matched studies, give matching criteria and number of exposed and unexposed<br><i>Case-control study</i> —For matched studies, give matching criteria and the number of controls per case                                                                                                                                                                                                                                                                                | -                              |
| Variables                 | 7       | Clearly define all outcomes, exposures, predictors, potential confounders, and effect modifiers. Give diagnostic criteria, if applicable                                                                                                                                                                                                                                                                                                                                                              | 4[5]-5[4]                      |
| Data sources/measurement  | 8*      | For each variable of interest, give sources of data and details of methods of assessment (measurement). Describe comparability of assessment methods if there is more than one group                                                                                                                                                                                                                                                                                                                  | 4[5]-5[4]                      |
| Bias                      | 9       | Describe any efforts to address potential sources of bias                                                                                                                                                                                                                                                                                                                                                                                                                                             | 5[1-3] 7[3-4] 8[1,3]           |
| Study size                | 10      | Explain how the study size was arrived at                                                                                                                                                                                                                                                                                                                                                                                                                                                             | 4[5]-5[3]                      |
| Quantitative variables    | 11      | Explain how quantitative variables were handled in the analyses. If applicable, describe which groupings were chosen and why                                                                                                                                                                                                                                                                                                                                                                          | 4[5]-5[4]                      |
| Statistical methods       | 12      | (a) Describe all statistical methods, including those used to control for confounding                                                                                                                                                                                                                                                                                                                                                                                                                 | 5[3]                           |
|                           |         | (b) Describe any methods used to examine subgroups and interactions                                                                                                                                                                                                                                                                                                                                                                                                                                   | 5[4]                           |
|                           |         | (c) Explain how missing data were addressed<br><br>We believe that the ascertainment of deaths overall is as good as it can be. We have accessed the original sources for this information (4[5]). There are no published government estimates prior to 1985. From 1985, our ascertainment compares favourably with that of government agencies (8[3]). Subjects included are those with available death data, plus age at death or age-group and natural or unnatural cause of death classification. |                                |



As a more detailed description of the cause of death was not consistently documented until after 1985 we restricted analyses by cause of death to 1985-2010. Additionally, as census data also became available from that time, death rates were calculated in the same time period.

(d) *Cohort study*—If applicable, explain how loss to follow-up was addressed

*Case-control study*—If applicable, explain how matching of cases and controls was addressed

*Cross-sectional study*—If applicable, describe analytical methods taking account of sampling strategy

(e) Describe any sensitivity analyses

Continued on next page

| Results           |     | Page No.(s)<br>[Paragraph<br>No.(s)]                                                                                                                                                                                                                                                                                                                                                                          |
|-------------------|-----|---------------------------------------------------------------------------------------------------------------------------------------------------------------------------------------------------------------------------------------------------------------------------------------------------------------------------------------------------------------------------------------------------------------|
| Participants      | 13* | (a) Report numbers of individuals at each stage of study—eg numbers potentially eligible, examined for eligibility, confirmed eligible, included in the study, completing follow-up, and analysed                                                                                                                                                                                                             |
|                   |     | (b) Give reasons for non-participation at each stage                                                                                                                                                                                                                                                                                                                                                          |
|                   |     | (c) Consider use of a flow diagram                                                                                                                                                                                                                                                                                                                                                                            |
| Descriptive data  | 14* | (a) Give characteristics of study participants (eg demographic, clinical, social) and information on exposures and potential confounders                                                                                                                                                                                                                                                                      |
|                   |     | (b) Indicate number of participants with missing data for each variable of interest                                                                                                                                                                                                                                                                                                                           |
|                   |     | (c) <i>Cohort study</i> —Summarise follow-up time (eg, average and total amount)                                                                                                                                                                                                                                                                                                                              |
| Outcome data      | 15* | <i>Cohort study</i> —Report numbers of outcome events or summary measures over time                                                                                                                                                                                                                                                                                                                           |
|                   |     | <i>Case-control study</i> —Report numbers in each exposure category, or summary measures of exposure                                                                                                                                                                                                                                                                                                          |
|                   |     | <i>Cross-sectional study</i> —Report numbers of outcome events or summary measures                                                                                                                                                                                                                                                                                                                            |
| Main results      | 16  | (a) Give unadjusted estimates and, if applicable, confounder-adjusted estimates and their precision (eg, 95% confidence interval). Make clear which confounders were adjusted for and why they were included<br>(b) Report category boundaries when continuous variables were categorized<br>(c) If relevant, consider translating estimates of relative risk into absolute risk for a meaningful time period |
| Other analyses    | 17  | Report other analyses done—eg analyses of subgroups and interactions, and sensitivity analyses                                                                                                                                                                                                                                                                                                                |
| <b>Discussion</b> |     |                                                                                                                                                                                                                                                                                                                                                                                                               |
| Key results       | 18  | Summarise key results with reference to study objectives                                                                                                                                                                                                                                                                                                                                                      |
| Limitations       | 19  | Discuss limitations of the study, taking into account sources of potential bias or imprecision. Discuss both direction and magnitude of any potential bias                                                                                                                                                                                                                                                    |
| Interpretation    | 20  | Give a cautious overall interpretation of results considering objectives, limitations, multiplicity of analyses, results from similar studies, and other relevant evidence                                                                                                                                                                                                                                    |

1  
2  
3  
4  
5  
6  
7  
8  
9  
10  
11  
12  
13  
14  
15  
16  
17  
18  
19  
20  
21  
22  
23  
24  
25  
26  
27  
28  
29  
30  
31  
32  
33  
34  
35  
36  
37  
38  
39  
40  
41  
42  
43  
44  
45  
46  
47  
48  
49  
50  
51  
52  
53  
54  
55  
56  
57  
58  
59  
60

|                  |    |                                                                       |      |
|------------------|----|-----------------------------------------------------------------------|------|
| Generalisability | 21 | Discuss the generalisability (external validity) of the study results | 9[1] |
|------------------|----|-----------------------------------------------------------------------|------|

---

**Other information**

---

|         |    |                                                                                                                                                               |       |
|---------|----|---------------------------------------------------------------------------------------------------------------------------------------------------------------|-------|
| Funding | 22 | Give the source of funding and the role of the funders for the present study and, if applicable, for the original study on which the present article is based | 11[3] |
|---------|----|---------------------------------------------------------------------------------------------------------------------------------------------------------------|-------|

\*Give information separately for cases and controls in case-control studies and, if applicable, for exposed and unexposed groups in cohort and cross-sectional studies.

**Note:** An Explanation and Elaboration article discusses each checklist item and gives methodological background and published examples of transparent reporting. The STROBE checklist is best used in conjunction with this article (freely available on the Web sites of PLoS Medicine at <http://www.plosmedicine.org/>, Annals of Internal Medicine at <http://www.annals.org/>, and Epidemiology at <http://www.epidem.com/>). Information on the STROBE Initiative is available at [www.strobe-statement.org](http://www.strobe-statement.org).
