# Supplementary material for: Transformation of mortality in a remote Australian Aboriginal community: a retrospective observational study
Source: PubMed Central journal article supplement — BMJ Open. 2017 Aug 11;7(8):e016094. doi: 10.1136/bmjopen-2017-016094 (PMC5629742; doi:10.1136/bmjopen-2017-016094), 2017-08-11
Supplement: bmjopen-2017-016094supp001.pdf [file bmjopen-2017-016094supp001.pdf]

**Supplementary Table 1. Frequencies of Tiwi deaths by age-group and time interval, 1960-2010**

| Age-group         | Deaths N (%), by time interval |                  |                 |                  |                 |                  |                  |                  |                  |                 |                 |                    |
|-------------------|--------------------------------|------------------|-----------------|------------------|-----------------|------------------|------------------|------------------|------------------|-----------------|-----------------|--------------------|
|                   | 1960-1964                      | 1965-1969        | 1970-1974       | 1975-1979        | 1980-1984       | 1985-1989        | 1990-1994        | 1995-1999        | 2000-2004        | 2005-2009       | 2010            | Total              |
| Under 15 years    | 69 (65.1)                      | 48 (42.9)        | 29 (30.5)       | 20 (14.4)        | 8 (9.6)         | 17 (11.4)        | 13 (12.3)        | 10 (7.8)         | 5 (4.1)          | 2 (2.0)         | 1 (6.3)         | 222 (19.2)         |
| 15 - <45 years    | 9 (8.5)                        | 6 (5.4)          | 19 (20.0)       | 28 (20.1)        | 16 (19.3)       | 31 (20.8)        | 32 (30.2)        | 46 (35.9)        | 50 (40.7)        | 40 (40.4)       | 2 (12.5)        | 279 (24.1)         |
| 45 years and over | 28 (26.4)                      | 58 (51.8)        | 47 (49.5)       | 91 (65.5)        | 59 (71.1)       | 101 (67.8)       | 61 (57.6)        | 72 (56.3)        | 68 (55.3)        | 57 (57.6)       | 13 (81.3)       | 655 (56.7)         |
| <b>Total</b>      | <b>106 (100)</b>               | <b>112 (100)</b> | <b>95 (100)</b> | <b>139 (100)</b> | <b>83 (100)</b> | <b>149 (100)</b> | <b>106 (100)</b> | <b>128 (100)</b> | <b>123 (100)</b> | <b>99 (100)</b> | <b>16 (100)</b> | <b>1,156 (100)</b> |

Note: 5-yearly time intervals are presented except for the single year of 2010; people who started dialysis are included among deaths
